# Supplementary material for: A DFT study of NHC-catalyzed reactions between 2-bromo-2-enals and acylhydrazones: mechanisms, and chemo- and stereoselectivities
Source: Royal Society of Chemistry journal article supplement (doi:10.1039/d2nj01078j), 2022-01-01
Supplement: d2nj01078j1.pdf [file d2nj01078j1.pdf]

Electronic Supplementary Material (ESI) for New Journal of Chemistry.

*Supporting Information*

**A DFT Study of NHC-Catalyzed Reactions between 2-Bromo-2-enals and  
Acylhydrazones: Mechanisms, Chemo- and Stereoselectivities**

**Yan Li\*, Lina Geng, Zhiyi Song, Zhiqiang Zhang**

*School of Chemical Engineering, University of Science and Technology Liaoning,  
Anshan 114051, P. R. China*

***Corresponding person: Yan Li***

***E-mail: yanli@ustl.edu.cn***

***Telephone: 86-412-5929627***

***Fax: 86-412-5929627***

## Content

|                                                                                                                                         |    |
|-----------------------------------------------------------------------------------------------------------------------------------------|----|
| <b>Computational Details</b> .....                                                                                                      | S2 |
| <b>Table 1</b> Different computational levels.....                                                                                      | S3 |
| <b>Table 2</b> Comparison of relative energies for stereoselective transition states at different levels. Energies are in kcal/mol..... | S4 |
| <b>Fig. S1</b> Energy profiles and optimized structures for direct proton transfer. ....                                                | S5 |
| <b>Fig. S2</b> Energy profiles and optimized structures for water-assisted proton transfer. ....                                        | S6 |
| <b>Fig. S3</b> Energy profiles and optimized structures for <b>M3</b> → <b>M4</b> conversion. ....                                      | S7 |
| <b>Fig. S4</b> Energy profiles for other possible pathways of steps 4-7.....                                                            | S8 |
| <b>Cartesian Coordinates</b> .....                                                                                                      | S9 |

## 1. Computational Details:

The extent of enantioselectivity, in terms of enantiomeric excess (ee %), was calculated by using the Boltzmann distribution of diastereomeric transition states with the following equations:

$$\frac{[R]}{[S]} = \frac{\exp(-G_{[R]}^\ddagger)}{\exp(-G_{[S]}^\ddagger)} = \exp(\Delta G^\ddagger / RT) \quad (1)$$

$$ee = \frac{[R]-[S]}{[R]+[S]} \times 100\% = \frac{\frac{[R]}{[S]} - 1}{\frac{[R]}{[S]} + 1} \times 100\% \quad (2)$$

Where  $G^\ddagger$  is the Gibbs free energy barrier of the competing diastereomeric transition state and  $\Delta G^\ddagger$  is the Gibbs free energy difference between the two diastereomeric transition states.

In distortion-interaction analysis, the transition state was divided into two fragments, followed by single point energy calculations on each fragment. The activation energy  $\Delta E^\ddagger$  was divided into  $\Delta E_{\text{dist}}^\ddagger$  and  $\Delta E_{\text{int}}^\ddagger$ , where  $\Delta E_{\text{dist}}^\ddagger$  and  $\Delta E_{\text{int}}^\ddagger$  are distortion energy and interaction energy, respectively. The distortion energy  $\Delta E_{\text{dist}}^\ddagger$  of each fragment is the energy difference between the distorted fragment and the corresponding optimized structure without the other fragment. The interaction energy  $\Delta E_{\text{int}}^\ddagger$  can be calculated using  $\Delta E_{\text{int}}^\ddagger = \Delta E^\ddagger - \Delta E_{\text{dist}}^\ddagger$ .

In global reactivity index (GRI) analysis, the electrophilicity index  $\omega$  which reflects the molecular global electrophilicity character can be measured with the expression  $\omega = (\mu^2/2\eta)$  (eV), where  $\mu$  is the electronic chemical potential and  $\eta$  is the chemical hardness. The values of  $\mu$  and  $\eta$  can be determined in terms of the one-electron energy of HOMO and LUMO ( $E_{\text{HOMO}}$  and  $E_{\text{LUMO}}$ ) using  $\mu \approx (E_{\text{HOMO}} - E_{\text{LUMO}})/2$  and  $\eta \approx (E_{\text{LUMO}} - E_{\text{HOMO}})$ . Within the Kohn–Sham scheme, the molecular nucleophilicity character is reflected by the value of the nucleophilicity index  $N$  as defined in  $N = E_{\text{HOMO}}(\text{Nu}) - E_{\text{LUMO}}(\text{TCE})$ , where  $E_{\text{LUMO}}(\text{TCE})$  is the LUMO energy of tetracyanoethylene (TCE).

Table S1 Different computational levels.

|           | Optimization |            |                 | Single Point Energy |                   |                 |
|-----------|--------------|------------|-----------------|---------------------|-------------------|-----------------|
|           | Functional   | Basis Set  | Solvation Model | Functional          | Basis Set         | Solvation Model |
| <b>L1</b> | M062-2X      | 6-31G(d,p) | IEF-PCM         | M062-2X-D3          | 6-311++G(2df,2pd) | IEF-PCM         |
| <b>L2</b> | B3LYP-D3     | 6-31G(d,p) | IEF-PCM         | B3LYP-D3            | 6-311++G(2df,2pd) | IEF-PCM         |
| <b>L3</b> | B3PW91-D3    | 6-31G(d,p) | IEF-PCM         | B3PW91-D3           | 6-311++G(2df,2pd) | IEF-PCM         |
| <b>L4</b> | wB97-XD      | 6-31G(d,p) | IEF-PCM         | wB97-XD             | 6-311++G(2df,2pd) | IEF-PCM         |
| <b>L5</b> | M06-2X       | 6-31G(d,p) | SMD             | M06-2X-D3           | 6-311++G(2df,2pd) | SMD             |

Table 2. Comparison of relative energies for stereoselective transition states at different levels. Energies are in kcal/mol.

|               | <b>L1</b> | <b>L2</b> | <b>L3</b> | <b>L4</b> | <b>L5</b> |
|---------------|-----------|-----------|-----------|-----------|-----------|
| <b>TS6(R)</b> | 0.0       | 0.0       | 0.0       | 0.0       | 0.0       |
| <b>TS6(S)</b> | 12.4      | 12.1      | 12.8      | 12.0      | 10.6      |

Fig. S1 Energy profiles and optimized structures for direct proton transfer. Bond distances are given in Å.

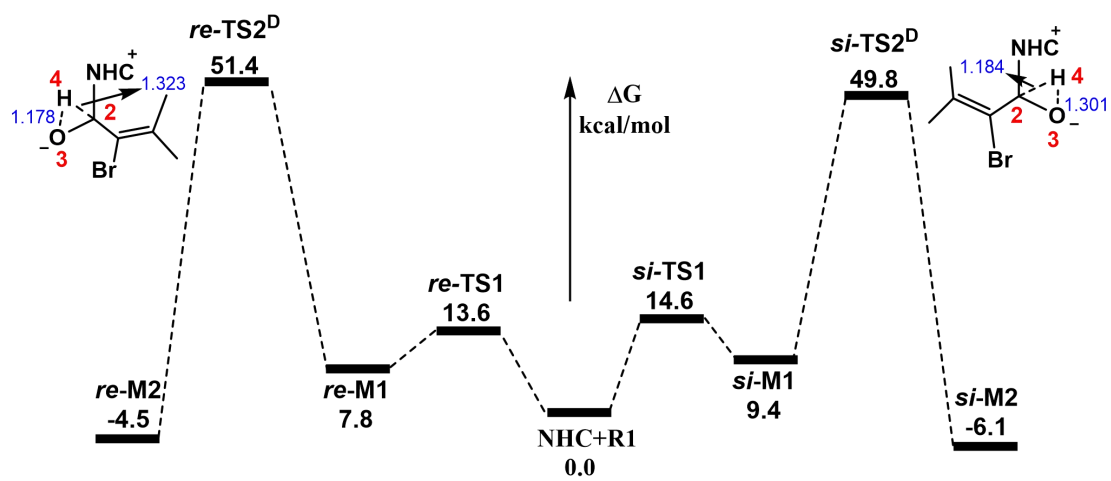

Fig. S2 Energy profiles and optimized structures for water-assisted proton transfer. Bond distances are given in Å.

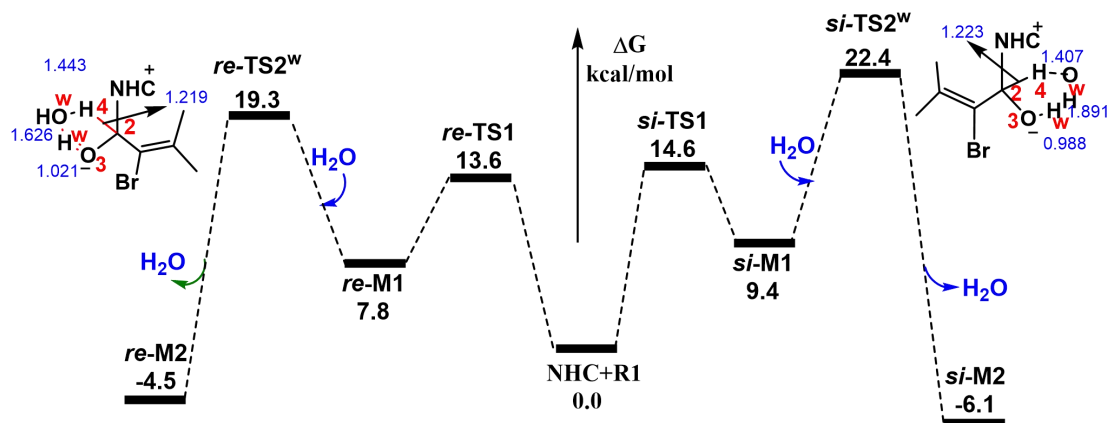

Fig. S3 Energy profiles and optimized structures for **M3** → **M4** conversion. Bond distances are given in Å.

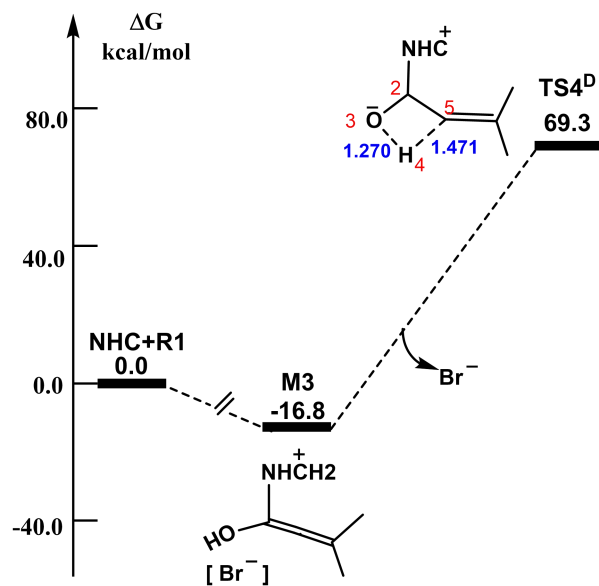



Fig. S4 Energy profiles for other possible pathways of steps 4-7.

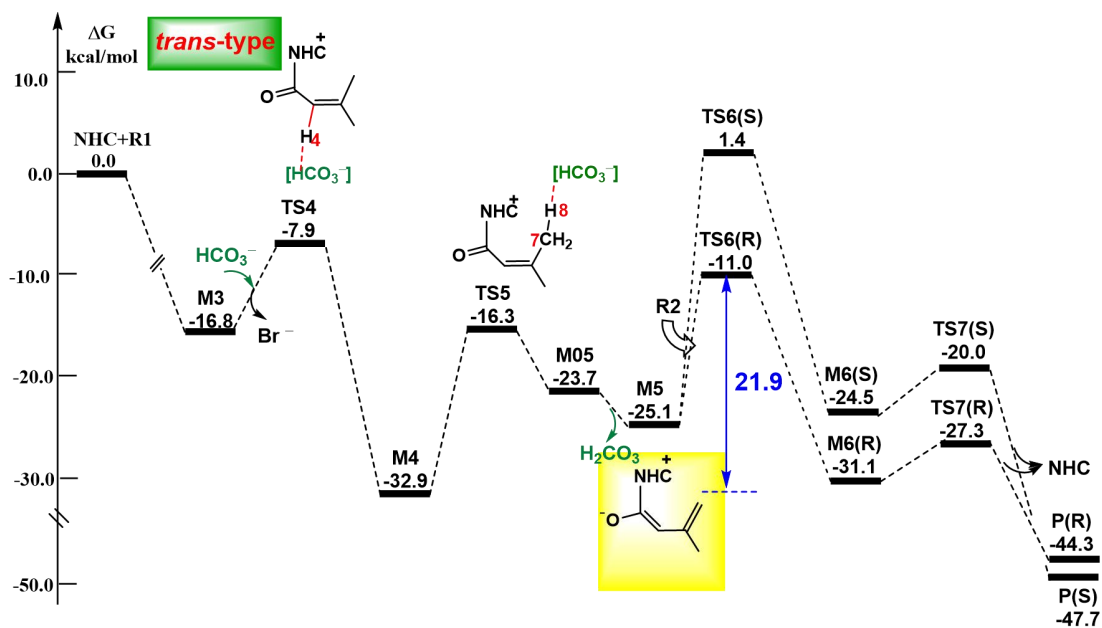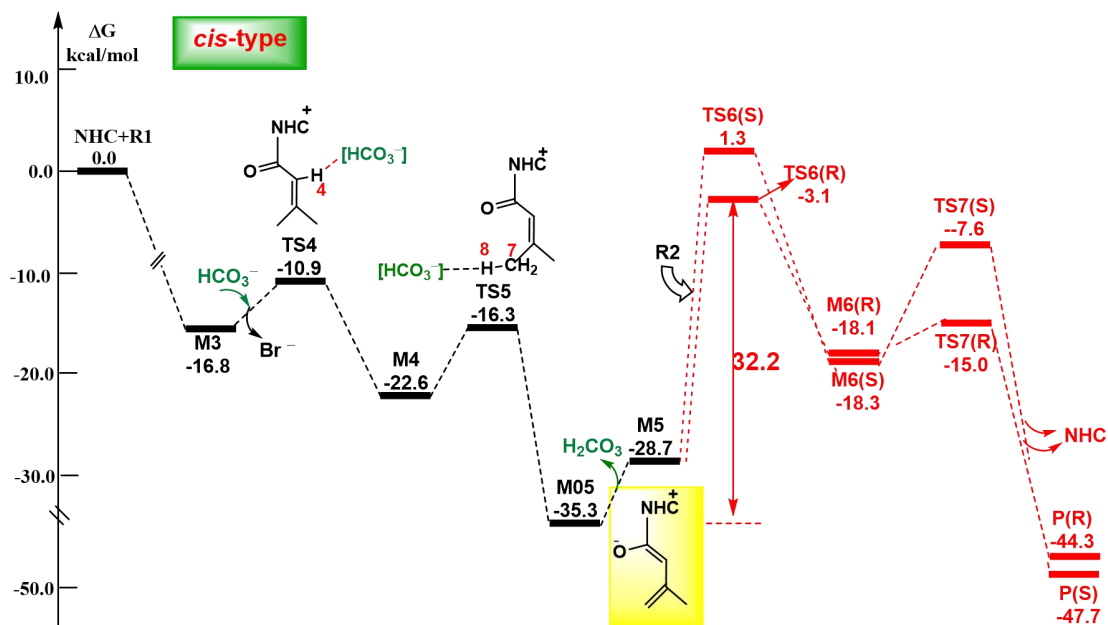

## Cartesian Coordinates

### NHC

|   |             |             |             |
|---|-------------|-------------|-------------|
| C | -4.52239000 | 0.92294200  | -0.37102600 |
| C | -3.61226100 | 0.77949300  | 0.67830400  |
| C | -3.23749400 | 1.86391800  | 1.46215500  |
| C | -3.80305000 | 3.10779300  | 1.18932000  |
| C | -4.72354600 | 3.25430800  | 0.14985400  |
| C | -5.08869400 | 2.16444200  | -0.63928600 |
| C | -4.72755300 | -0.38981900 | -1.08553400 |
| C | -4.22055600 | -1.40884300 | -0.04158200 |
| C | -3.14746700 | -0.65207200 | 0.78446200  |
| H | -2.51187300 | 1.74042600  | 2.25938800  |
| H | -3.52891400 | 3.96896200  | 1.78988500  |
| H | -5.16081600 | 4.22859500  | -0.04494500 |
| H | -5.80482200 | 2.28424000  | -1.44683400 |
| H | -4.12127400 | -0.41881400 | -1.99888000 |
| H | -5.04326200 | -1.64474700 | 0.63822600  |
| H | -5.76386700 | -0.58153500 | -1.37304300 |
| H | -3.09243600 | -1.01253000 | 1.81461000  |
| N | -1.83332000 | -0.85321600 | 0.16892300  |
| O | -3.78528900 | -2.65772200 | -0.53556200 |
| C | -0.68028200 | -0.21389000 | 0.54545900  |
| C | -1.58987000 | -1.76120100 | -0.82889300 |
| N | 0.19342400  | -0.80782100 | -0.29812800 |
| N | -0.33486700 | -1.75460700 | -1.15490900 |
| C | -2.68520900 | -2.59234900 | -1.42108600 |
| H | -2.98030700 | -2.18703900 | -2.39810800 |
| H | -2.33589100 | -3.61502500 | -1.57294600 |
| C | 1.57871800  | -0.47325700 | -0.40298700 |
| C | 1.89627100  | 0.87863700  | -0.52573100 |
| C | 2.57011400  | -1.46256000 | -0.37227200 |
| C | 3.22130700  | 1.27433200  | -0.64459600 |
| C | 3.89401300  | -1.03487100 | -0.52172800 |
| C | 4.22409500  | 0.30848400  | -0.65749600 |
| H | 3.46593800  | 2.32697200  | -0.73887500 |
| H | 4.68828300  | -1.77580700 | -0.51669000 |
| H | 1.08646400  | 1.59982300  | -0.52133500 |
| H | 5.26371300  | 0.60071100  | -0.76512400 |
| C | 2.26244900  | -2.93671100 | -0.17287100 |
| C | 3.18451600  | -3.57958400 | 0.86916300  |
| C | 2.34079000  | -3.68930500 | -1.50601400 |
| H | 1.23733300  | -3.01714100 | 0.19882800  |
| H | 3.18468800  | -3.01429900 | 1.80484200  |
| H | 2.84888300  | -4.59877400 | 1.08173700  |

|   |            |             |             |
|---|------------|-------------|-------------|
| H | 4.21639600 | -3.64537900 | 0.51060900  |
| H | 1.63042400 | -3.27317700 | -2.22299200 |
| H | 3.34929200 | -3.61317000 | -1.92735800 |
| H | 2.11386200 | -4.75022700 | -1.36061900 |

**R1**

|    |             |             |             |
|----|-------------|-------------|-------------|
| C  | -0.02946600 | 1.35287500  | 0.01525800  |
| C  | 1.20255600  | 0.80941700  | 0.01461600  |
| Br | 1.42116100  | -1.07037900 | 0.14997100  |
| C  | 2.47574400  | 1.54870600  | -0.08757700 |
| O  | 3.56823100  | 1.03164000  | -0.08370600 |
| H  | 2.37262200  | 2.64357000  | -0.17173000 |
| C  | -1.26003300 | 0.49508000  | 0.12448300  |
| H  | -1.24385400 | -0.07371400 | 1.05929500  |
| H  | -2.16657200 | 1.10108400  | 0.09157300  |
| H  | -1.28749900 | -0.23756400 | -0.68760900 |
| C  | -0.29597500 | 2.83023900  | -0.08918000 |
| H  | -0.87822400 | 3.14668400  | 0.78245200  |
| H  | 0.59016600  | 3.45668600  | -0.15657300 |
| H  | -0.91969100 | 3.01599600  | -0.96990000 |

**R2**

|   |             |             |             |
|---|-------------|-------------|-------------|
| C | -1.62176700 | 1.11959900  | -0.03607500 |
| N | -0.38626600 | 0.80121500  | 0.00146900  |
| N | 0.50310900  | 1.77056800  | 0.22855100  |
| O | 2.56466500  | 2.60695500  | 0.25461500  |
| C | 2.48503200  | 0.23551800  | 0.09543300  |
| C | 1.87611300  | -0.95546800 | 0.50605000  |
| C | 2.57830600  | -2.15375500 | 0.41447400  |
| C | 3.87527000  | -2.17695100 | -0.09063600 |
| C | 4.48524000  | -0.99154900 | -0.49589500 |
| C | 3.79625500  | 0.20933100  | -0.39288500 |
| H | 0.86330300  | -0.95700000 | 0.88522100  |
| H | 2.10432500  | -3.07433200 | 0.73843200  |
| H | 5.49739700  | -1.00305400 | -0.88630000 |
| H | 4.25861700  | 1.14586300  | -0.68495100 |
| C | -2.60677500 | 0.02770900  | -0.26408200 |
| O | -2.34345900 | -1.14595200 | -0.35838900 |
| O | -3.83931500 | 0.54694200  | -0.34849200 |
| C | -4.90792600 | -0.39575200 | -0.55424800 |
| C | -5.29487800 | -1.06879600 | 0.74860600  |
| H | -4.58941600 | -1.12777700 | -1.29986900 |
| H | -5.72573900 | 0.20228600  | -0.95835700 |
| H | -6.15042600 | -1.72847300 | 0.58428000  |

|   |             |             |             |
|---|-------------|-------------|-------------|
| H | -4.46407600 | -1.66669400 | 1.12781900  |
| H | -5.57109000 | -0.32224100 | 1.49681600  |
| H | -1.99436800 | 2.13829100  | 0.09032900  |
| H | 0.20603000  | 2.74245000  | 0.30855600  |
| C | 1.88194600  | 1.60051500  | 0.19779200  |
| H | 4.41152100  | -3.11776800 | -0.16518800 |

**H<sub>2</sub>O**

|   |            |            |             |
|---|------------|------------|-------------|
| O | 0.02545500 | 0.00000000 | 0.01817900  |
| H | 0.06657500 | 0.00000000 | 0.97972100  |
| H | 0.94804000 | 0.00000000 | -0.25602400 |

**HCO<sub>3</sub><sup>-</sup>**

|   |             |             |             |
|---|-------------|-------------|-------------|
| H | 1.68282400  | -0.44242300 | 0.00003000  |
| C | -0.12706100 | 0.08170900  | 0.00000400  |
| O | -1.29244200 | -0.33520000 | -0.00001200 |
| O | 0.34030300  | 1.24059200  | 0.00000800  |
| O | 0.85750500  | -0.94114700 | 0.00001900  |

**H<sub>2</sub>CO<sub>3</sub>**

|   |             |             |             |
|---|-------------|-------------|-------------|
| H | -1.61931800 | -0.75412000 | 0.00002700  |
| C | 0.05420600  | 0.12971300  | -0.00002300 |
| O | 0.73702000  | 1.11572700  | 0.00001900  |
| O | -1.27760000 | 0.15075400  | -0.00001600 |
| O | 0.51689100  | -1.13353700 | 0.00004700  |
| H | 1.48358600  | -1.08770800 | -0.00028800 |

**re-TS1**

|   |            |             |             |
|---|------------|-------------|-------------|
| C | 3.69180000 | -1.92000300 | -0.03485000 |
| C | 2.70324100 | -1.01801000 | 0.34917900  |
| C | 2.67707200 | -0.45388300 | 1.62193600  |
| C | 3.67722000 | -0.82616500 | 2.51761300  |
| C | 4.67362400 | -1.73108300 | 2.14257700  |
| C | 4.69092700 | -2.28338600 | 0.86389700  |
| C | 3.49767000 | -2.36452200 | -1.46297000 |
| C | 2.08580500 | -1.86976000 | -1.84904300 |
| C | 1.72947700 | -0.77036300 | -0.78290100 |
| H | 1.90287400 | 0.26205800  | 1.89764300  |
| H | 3.68341500 | -0.40619100 | 3.51824700  |
| H | 5.44275300 | -2.00834200 | 2.85694600  |
| H | 5.46575200 | -2.98794900 | 0.57586300  |
| H | 3.56103600 | -3.44864200 | -1.59787100 |
| H | 2.06490700 | -1.44297900 | -2.85286200 |
| H | 4.25028500 | -1.91152400 | -2.11745200 |

|    |             |             |             |
|----|-------------|-------------|-------------|
| H  | 1.84905400  | 0.23255000  | -1.19952400 |
| N  | 0.34260100  | -0.90819200 | -0.34774900 |
| O  | 1.14367400  | -2.93315300 | -1.90402700 |
| C  | -0.55891000 | 0.02929000  | 0.02947300  |
| C  | -0.20158700 | -2.15409100 | -0.17266300 |
| N  | -1.60364900 | -0.71812200 | 0.41448400  |
| N  | -1.41026300 | -2.07590400 | 0.29081800  |
| C  | 0.59762900  | -3.31881800 | -0.65375500 |
| H  | 1.38094400  | -3.58544500 | 0.06878100  |
| H  | -0.04575500 | -4.18230900 | -0.82239100 |
| C  | -2.83633100 | -0.22653900 | 0.95899600  |
| C  | -2.76631800 | 0.50554300  | 2.14319800  |
| C  | -4.04347800 | -0.48996800 | 0.30267000  |
| C  | -3.93955400 | 0.98326900  | 2.71361500  |
| C  | -5.20617600 | -0.01401000 | 0.91701600  |
| C  | -5.16163000 | 0.70831000  | 2.10457600  |
| H  | -3.89811100 | 1.56019300  | 3.63095100  |
| H  | -6.16689600 | -0.20607900 | 0.44853600  |
| H  | -1.79025800 | 0.71174300  | 2.57750500  |
| H  | -6.08435500 | 1.06637000  | 2.54987400  |
| C  | -4.11198600 | -1.25590000 | -1.00633700 |
| C  | -5.01871000 | -0.56385600 | -2.02910000 |
| C  | -4.56542800 | -2.69955900 | -0.75793500 |
| H  | -3.10293400 | -1.28943300 | -1.43042400 |
| H  | -4.72991400 | 0.48060400  | -2.17644600 |
| H  | -4.95271100 | -1.07896200 | -2.99158300 |
| H  | -6.06757600 | -0.58607800 | -1.71813800 |
| H  | -3.88059100 | -3.20500800 | -0.07346200 |
| H  | -5.56917100 | -2.71290100 | -0.31962400 |
| H  | -4.59808400 | -3.25735700 | -1.69876900 |
| C  | 0.04880500  | 2.89879300  | -1.56939000 |
| C  | 0.55548100  | 2.47057700  | -0.40784300 |
| Br | 2.40986200  | 2.62081000  | -0.00121300 |
| C  | -0.25028400 | 1.85669200  | 0.72265800  |
| O  | 0.23654400  | 1.70846200  | 1.86278400  |
| H  | -1.31652600 | 2.12850500  | 0.61313900  |
| C  | 0.83396900  | 3.57579500  | -2.65500700 |
| H  | 0.86453900  | 2.93858500  | -3.54667500 |
| H  | 0.33216100  | 4.50445700  | -2.94786600 |
| H  | 1.85437200  | 3.80308200  | -2.35062400 |
| C  | -1.42303800 | 2.70258600  | -1.86680700 |
| H  | -1.80023200 | 1.74834700  | -1.48691800 |
| H  | -2.02401800 | 3.50397100  | -1.42320000 |
| H  | -1.58845600 | 2.72782100  | -2.94693900 |

**si-TS1**

|   |              |              |              |
|---|--------------|--------------|--------------|
| C | 4. 95902900  | -0. 20281000 | 0. 18973400  |
| C | 3. 65300300  | -0. 67045300 | 0. 06706200  |
| C | 3. 32204900  | -1. 70290700 | -0. 80518000 |
| C | 4. 34243200  | -2. 25636200 | -1. 57594300 |
| C | 5. 65439200  | -1. 78894900 | -1. 46681800 |
| C | 5. 97417000  | -0. 76265200 | -0. 58063600 |
| C | 5. 05098000  | 0. 89275400  | 1. 22123100  |
| C | 3. 58751800  | 1. 28919000  | 1. 51641300  |
| C | 2. 71829400  | 0. 08487400  | 0. 98917100  |
| H | 2. 29816900  | -2. 06958000 | -0. 85897000 |
| H | 4. 11579800  | -3. 06213200 | -2. 26658500 |
| H | 6. 43428200  | -2. 23191300 | -2. 07842600 |
| H | 6. 99527600  | -0. 40248900 | -0. 49631300 |
| H | 5. 61152600  | 1. 76978600  | 0. 88393600  |
| H | 3. 41388700  | 1. 44255900  | 2. 58242300  |
| H | 5. 53654600  | 0. 52765300  | 2. 13286200  |
| H | 2. 37644400  | -0. 53592700 | 1. 82171500  |
| N | 1. 53244900  | 0. 58030300  | 0. 29721400  |
| O | 3. 24557400  | 2. 53486300  | 0. 92438900  |
| C | 0. 27076200  | 0. 08661000  | 0. 25118300  |
| C | 1. 61320500  | 1. 69504900  | -0. 49654700 |
| N | -0. 33676600 | 0. 94288600  | -0. 58154600 |
| N | 0. 47191500  | 1. 95370200  | -1. 05433600 |
| C | 2. 88639200  | 2. 47172300  | -0. 44687500 |
| H | 3. 66922700  | 1. 99545000  | -1. 05225900 |
| H | 2. 72853400  | 3. 49122100  | -0. 79820800 |
| C | -1. 70197900 | 0. 86597000  | -1. 00892400 |
| C | -2. 09275300 | -0. 30070700 | -1. 65666200 |
| C | -2. 58802300 | 1. 91601900  | -0. 73963900 |
| C | -3. 41112300 | -0. 44286600 | -2. 06877600 |
| C | -3. 90041500 | 1. 75424200  | -1. 19506000 |
| C | -4. 31053900 | 0. 59662900  | -1. 84991000 |
| H | -3. 72876800 | -1. 36287900 | -2. 54702400 |
| H | -4. 62128600 | 2. 54791800  | -1. 02268500 |
| H | -1. 36753300 | -1. 10149600 | -1. 78010800 |
| H | -5. 34030900 | 0. 50339400  | -2. 17960900 |
| C | -2. 16789300 | 3. 17805000  | -0. 00700900 |
| C | -3. 17791500 | 3. 58682000  | 1. 07035000  |
| C | -1. 93894600 | 4. 32221600  | -1. 00220000 |
| H | -1. 21384000 | 2. 97806400  | 0. 49300700  |
| H | -3. 38275800 | 2. 76469500  | 1. 76312800  |
| H | -2. 78594700 | 4. 43052300  | 1. 64547000  |

|    |             |             |             |
|----|-------------|-------------|-------------|
| H  | -4.12871300 | 3.90466900  | 0.63197600  |
| H  | -1.17410200 | 4.04840900  | -1.73221400 |
| H  | -2.86657200 | 4.55133600  | -1.53743800 |
| H  | -1.61672400 | 5.22663500  | -0.47702400 |
| C  | -2.31094700 | -0.89455700 | 1.82641600  |
| C  | -1.65322600 | -1.74412300 | 1.03069800  |
| Br | -2.57927800 | -3.09754000 | 0.06003400  |
| C  | -0.14594500 | -1.79743300 | 0.77997700  |
| O  | 0.31010000  | -2.51177600 | -0.13207900 |
| H  | 0.40800500  | -1.68461500 | 1.73591600  |
| C  | -3.80463800 | -0.82165700 | 1.96170600  |
| H  | -4.10702000 | -1.01620300 | 2.99669400  |
| H  | -4.13280200 | 0.19581400  | 1.71355000  |
| H  | -4.31555900 | -1.52131300 | 1.30278900  |
| C  | -1.57099000 | 0.16683100  | 2.60360200  |
| H  | -2.07177700 | 0.33983900  | 3.56108600  |
| H  | -0.52756900 | -0.08234600 | 2.80129300  |
| H  | -1.59164700 | 1.11490000  | 2.04783900  |

**re-M1**

|   |             |             |             |
|---|-------------|-------------|-------------|
| C | 3.67322700  | -1.81711400 | -0.07512800 |
| C | 2.71207200  | -0.92009600 | 0.38207000  |
| C | 2.71497100  | -0.42758700 | 1.68466200  |
| C | 3.71820600  | -0.87996300 | 2.53981400  |
| C | 4.68519100  | -1.78622200 | 2.09621400  |
| C | 4.67366100  | -2.25956100 | 0.78597800  |
| C | 3.46160500  | -2.15679900 | -1.52883200 |
| C | 2.07728800  | -1.56904700 | -1.88699400 |
| C | 1.73859100  | -0.56741800 | -0.71942500 |
| H | 1.94501300  | 0.28160800  | 1.99763800  |
| H | 3.75036900  | -0.52196600 | 3.56386200  |
| H | 5.45593500  | -2.12614700 | 2.78118100  |
| H | 5.42834000  | -2.96183100 | 0.44408800  |
| H | 3.47125600  | -3.23188100 | -1.73462800 |
| H | 2.09520400  | -1.03710100 | -2.83903900 |
| H | 4.23877900  | -1.70239800 | -2.15237600 |
| H | 1.86317200  | 0.46465500  | -1.04851900 |
| N | 0.34369400  | -0.73519700 | -0.29652900 |
| O | 1.09738600  | -2.58088000 | -2.07429000 |
| C | -0.55922100 | 0.13671700  | 0.19687600  |
| C | -0.22932800 | -1.97977200 | -0.26858700 |
| N | -1.63031300 | -0.61010600 | 0.47706700  |
| N | -1.44094800 | -1.93804400 | 0.19261900  |
| C | 0.54917400  | -3.09806300 | -0.87559300 |

|    |             |             |             |
|----|-------------|-------------|-------------|
| H  | 1.32843200  | -3.45282300 | -0.18714100 |
| H  | -0.10997600 | -3.92671900 | -1.13300600 |
| C  | -2.85476700 | -0.16436900 | 1.08016400  |
| C  | -2.76084100 | 0.46270200  | 2.32174700  |
| C  | -4.06769800 | -0.37576600 | 0.41682800  |
| C  | -3.92825000 | 0.87559700  | 2.95031700  |
| C  | -5.22207300 | 0.03169600  | 1.09304300  |
| C  | -5.15943000 | 0.64269400  | 2.34064300  |
| H  | -3.87461900 | 1.37224800  | 3.91284800  |
| H  | -6.18970100 | -0.12434900 | 0.62543800  |
| H  | -1.77131000 | 0.65031900  | 2.73670700  |
| H  | -6.07624700 | 0.95004200  | 2.83346700  |
| C  | -4.15480700 | -1.01058800 | -0.95952200 |
| C  | -5.06404200 | -0.21244700 | -1.89973300 |
| C  | -4.62027300 | -2.46721200 | -0.84915300 |
| H  | -3.15081600 | -1.00970700 | -1.39710200 |
| H  | -4.76138300 | 0.83716400  | -1.95134500 |
| H  | -5.01707200 | -0.63558100 | -2.90711200 |
| H  | -6.10889400 | -0.24967800 | -1.57723100 |
| H  | -3.93403600 | -3.04633800 | -0.22733900 |
| H  | -5.61852000 | -2.51397700 | -0.40090400 |
| H  | -4.67136300 | -2.92783200 | -1.84034300 |
| C  | -0.01027100 | 2.59375600  | -1.64723000 |
| C  | 0.43608100  | 2.34835900  | -0.41052200 |
| Br | 2.17238200  | 2.88127500  | 0.15259900  |
| C  | -0.33784600 | 1.58171000  | 0.69338100  |
| O  | 0.21752300  | 1.46262300  | 1.88616200  |
| H  | -1.35947400 | 2.03149200  | 0.67967300  |
| C  | 0.75634200  | 3.30866300  | -2.72383000 |
| H  | 0.77798100  | 2.70037400  | -3.63547000 |
| H  | 0.25247000  | 4.24718800  | -2.98130300 |
| H  | 1.77805100  | 3.53232200  | -2.42075600 |
| C  | -1.37420400 | 2.09514100  | -2.07607300 |
| H  | -2.05956300 | 1.92453500  | -1.24196200 |
| H  | -1.84035200 | 2.81826000  | -2.75208100 |
| H  | -1.27830500 | 1.15254700  | -2.63145600 |

**si-M1**

|   |            |             |             |
|---|------------|-------------|-------------|
| C | 5.02016500 | 0.03998300  | -0.12566000 |
| C | 3.76681600 | -0.56179700 | -0.19469200 |
| C | 3.45331300 | -1.51753300 | -1.15761000 |
| C | 4.44800800 | -1.85898700 | -2.07176200 |
| C | 5.71053200 | -1.26245500 | -2.01416900 |
| C | 6.00806500 | -0.31099300 | -1.04093300 |



|    |             |             |             |
|----|-------------|-------------|-------------|
| C  | 5.09803500  | 1.02231100  | 1.01492700  |
| C  | 3.64483000  | 1.17729700  | 1.51942100  |
| C  | 2.85571900  | -0.03415100 | 0.89226900  |
| H  | 2.45574000  | -1.96502200 | -1.17657000 |
| H  | 4.24050500  | -2.59876500 | -2.83819700 |
| H  | 6.46967500  | -1.54353900 | -2.73766400 |
| H  | 6.99018900  | 0.15079600  | -0.99990700 |
| H  | 5.49383000  | 2.00028800  | 0.72309800  |
| H  | 3.58707700  | 1.13712500  | 2.60765300  |
| H  | 5.73938800  | 0.64197500  | 1.81680600  |
| H  | 2.63925600  | -0.78891100 | 1.65212200  |
| N  | 1.57537300  | 0.42448000  | 0.35161600  |
| O  | 3.09197900  | 2.44332700  | 1.19014200  |
| C  | 0.39027700  | -0.20696500 | 0.23021700  |
| C  | 1.46455400  | 1.64383200  | -0.26029400 |
| N  | -0.38543200 | 0.65961700  | -0.42885500 |
| N  | 0.27545700  | 1.82157500  | -0.74469300 |
| C  | 2.63443300  | 2.56337400  | -0.14546700 |
| H  | 3.41489800  | 2.29984900  | -0.87249800 |
| H  | 2.32611400  | 3.59620500  | -0.30594200 |
| C  | -1.73072900 | 0.46151200  | -0.89612800 |
| C  | -1.95916900 | -0.64383000 | -1.70891900 |
| C  | -2.73393800 | 1.36849200  | -0.53633600 |
| C  | -3.23969800 | -0.85868300 | -2.20310600 |
| C  | -4.00260700 | 1.13214600  | -1.07254800 |
| C  | -4.25680400 | 0.03956000  | -1.89661300 |
| H  | -3.43803900 | -1.73037300 | -2.81723300 |
| H  | -4.81183200 | 1.81524500  | -0.83155300 |
| H  | -1.14206000 | -1.34414600 | -1.87498900 |
| H  | -5.25693800 | -0.11501800 | -2.28871000 |
| C  | -2.49548900 | 2.55247200  | 0.38340400  |
| C  | -3.54573000 | 2.62465200  | 1.49722000  |
| C  | -2.45471900 | 3.85870100  | -0.41831900 |
| H  | -1.51704700 | 2.42487400  | 0.85776000  |
| H  | -3.62773500 | 1.67263800  | 2.03052800  |
| H  | -3.27576700 | 3.40396200  | 2.21583600  |
| H  | -4.53444600 | 2.87292300  | 1.09964000  |
| H  | -1.66755200 | 3.82228100  | -1.17483000 |
| H  | -3.41245500 | 4.02589600  | -0.92232500 |
| H  | -2.26645900 | 4.70884900  | 0.24445500  |
| C  | -1.84759800 | -1.22232600 | 2.06894500  |
| C  | -1.26870900 | -1.90187000 | 1.07579900  |
| Br | -2.22112800 | -3.29996700 | 0.22079500  |
| C  | 0.16086600  | -1.70572700 | 0.50397400  |

|   |             |             |             |
|---|-------------|-------------|-------------|
| O | 0.45336100  | -2.31417900 | -0.63539200 |
| H | 0.84105400  | -1.93047100 | 1.36785200  |
| C | -3.28364700 | -1.43790700 | 2.47441200  |
| H | -3.42974000 | -2.43930800 | 2.89233300  |
| H | -3.59368800 | -0.70344300 | 3.22229500  |
| H | -3.94191800 | -1.35554100 | 1.60355200  |
| C | -1.08798600 | -0.16560800 | 2.83574600  |
| H | -1.31639600 | -0.25223200 | 3.90261000  |
| H | -0.00367500 | -0.24497600 | 2.72481000  |
| H | -1.39123600 | 0.84314300  | 2.52521500  |

**re-TS2**

|   |             |             |             |
|---|-------------|-------------|-------------|
| C | 4.17200100  | 1.38492900  | -0.43273400 |
| C | 2.98965200  | 0.65980000  | -0.54689400 |
| C | 2.45903400  | 0.29627500  | -1.78409800 |
| C | 3.16546300  | 0.67495600  | -2.92375100 |
| C | 4.35993700  | 1.39419100  | -2.82197000 |
| C | 4.87208100  | 1.75619300  | -1.57835000 |
| C | 4.50601100  | 1.66065400  | 1.01354600  |
| C | 3.24580300  | 1.24105300  | 1.81213200  |
| C | 2.38518400  | 0.39518700  | 0.81409100  |
| H | 1.52639600  | -0.27028800 | -1.86468600 |
| H | 2.78230200  | 0.40642300  | -3.90294000 |
| H | 4.89191100  | 1.67953500  | -3.72444400 |
| H | 5.79507900  | 2.32444700  | -1.50521800 |
| H | 4.74180100  | 2.71136500  | 1.21316500  |
| H | 3.50648700  | 0.63864400  | 2.68303600  |
| H | 5.37074800  | 1.07127000  | 1.33605000  |
| H | 2.41132900  | -0.66271900 | 1.07352100  |
| N | 0.98960200  | 0.84723400  | 0.82479500  |
| O | 2.54573500  | 2.34853800  | 2.36112900  |
| C | -0.06285100 | 0.25516700  | 0.18763200  |
| C | 0.73640700  | 2.19581300  | 0.86312300  |
| N | -0.89772500 | 1.27646100  | -0.08834100 |
| N | -0.40407100 | 2.48956800  | 0.33129800  |
| C | 1.79813800  | 3.08927600  | 1.41969900  |
| H | 2.43303900  | 3.46567200  | 0.60368100  |
| H | 1.35338100  | 3.94038800  | 1.93710800  |
| C | -2.13442500 | 1.23436300  | -0.82270300 |
| C | -2.04410700 | 1.12400300  | -2.20643700 |
| C | -3.35324300 | 1.32218000  | -0.14561700 |
| C | -3.20605200 | 1.11642700  | -2.96321000 |
| C | -4.50559400 | 1.30625600  | -0.93661900 |
| C | -4.43727800 | 1.20844700  | -2.32117100 |

|    |             |             |             |
|----|-------------|-------------|-------------|
| H  | -3.15109600 | 1.01239800  | -4.04146900 |
| H  | -5.47607600 | 1.33798800  | -0.45350000 |
| H  | -1.06655300 | 0.99758000  | -2.65668800 |
| H  | -5.35461800 | 1.18160000  | -2.90088600 |
| C  | -3.42628600 | 1.43002000  | 1.36521300  |
| C  | -4.65254100 | 0.71952800  | 1.94276200  |
| C  | -3.39881200 | 2.90330700  | 1.79798500  |
| H  | -2.53824100 | 0.92537800  | 1.76349600  |
| H  | -4.75229900 | -0.28409500 | 1.52090200  |
| H  | -4.55213600 | 0.64874100  | 3.03081500  |
| H  | -5.56718200 | 1.29010300  | 1.74102700  |
| H  | -2.50072800 | 3.41209900  | 1.43884400  |
| H  | -4.27338300 | 3.42717700  | 1.39556500  |
| H  | -3.43411400 | 2.97980200  | 2.89007500  |
| C  | 0.60600300  | -2.36909600 | 1.90696700  |
| C  | 0.58337300  | -2.08980600 | 0.59452800  |
| Br | 1.89757300  | -2.90531800 | -0.57909900 |
| C  | -0.34019200 | -1.15410100 | -0.12440600 |
| O  | -0.55061200 | -1.36482200 | -1.46036400 |
| H  | -1.48709500 | -1.31637500 | 0.40921200  |
| C  | 1.61528500  | -3.24703200 | 2.59380400  |
| H  | 1.10580600  | -4.07398700 | 3.10184900  |
| H  | 2.35263600  | -3.65727400 | 1.90598200  |
| H  | 2.13727700  | -2.67631000 | 3.37329300  |
| C  | -0.38378500 | -1.71080500 | 2.84398600  |
| H  | -1.35887300 | -1.55271400 | 2.37905800  |
| H  | -0.52338000 | -2.33555000 | 3.73213300  |
| H  | 0.00184000  | -0.74201500 | 3.19232100  |
| H  | -1.94761300 | -1.68645800 | -1.50635000 |
| C  | -3.56360000 | -1.78563300 | -0.30867200 |
| O  | -4.78591100 | -1.93857500 | -0.20113700 |
| O  | -2.78996800 | -1.52509400 | 0.71001600  |
| O  | -2.99049400 | -1.87865600 | -1.51011500 |

**re-TS2<sup>w</sup>**

|   |             |             |             |
|---|-------------|-------------|-------------|
| C | -4.81327300 | -0.20562700 | 0.09092400  |
| C | -3.57615000 | 0.43123500  | 0.14951200  |
| C | -3.39989000 | 1.74075700  | -0.29262800 |
| C | -4.51674900 | 2.40906700  | -0.79214400 |
| C | -5.76491200 | 1.78462700  | -0.84447800 |
| C | -5.92302000 | 0.47186800  | -0.40527200 |
| C | -4.72644300 | -1.61827400 | 0.61285000  |
| C | -3.21361400 | -1.90905100 | 0.74785000  |
| C | -2.52617800 | -0.49671100 | 0.72030900  |

|    |             |             |             |
|----|-------------|-------------|-------------|
| H  | -2.42784700 | 2.23980000  | -0.27337200 |
| H  | -4.41046000 | 3.42849200  | -1.14861500 |
| H  | -6.61979800 | 2.32452700  | -1.23986000 |
| H  | -6.89182900 | -0.01628800 | -0.45860200 |
| H  | -5.18812300 | -2.35725900 | -0.04939500 |
| H  | -2.97949700 | -2.41835100 | 1.68332100  |
| H  | -5.21655900 | -1.70697300 | 1.58826500  |
| H  | -2.19782500 | -0.19057800 | 1.71220000  |
| N  | -1.33800300 | -0.52097600 | -0.13600800 |
| O  | -2.74324700 | -2.79987700 | -0.25621000 |
| C  | -0.18530000 | 0.16855800  | -0.08123100 |
| C  | -1.30542000 | -1.27855300 | -1.27751200 |
| N  | 0.48488700  | -0.19541300 | -1.17720900 |
| N  | -0.19391400 | -1.11536900 | -1.92871100 |
| C  | -2.45445900 | -2.20290500 | -1.50600600 |
| H  | -3.31811700 | -1.65626800 | -1.90980000 |
| H  | -2.17250500 | -2.99392400 | -2.20071600 |
| C  | 1.75091500  | 0.33087700  | -1.60249200 |
| C  | 1.78263400  | 1.65821800  | -2.02406200 |
| C  | 2.88031100  | -0.48872100 | -1.55007700 |
| C  | 2.99153000  | 2.18577200  | -2.46206300 |
| C  | 4.07661200  | 0.07339200  | -2.00605700 |
| C  | 4.13310300  | 1.38582900  | -2.46509300 |
| H  | 3.04121900  | 3.21732100  | -2.79346100 |
| H  | 4.98038800  | -0.52878000 | -1.99685100 |
| H  | 0.88302200  | 2.26813000  | -1.94771500 |
| H  | 5.07737700  | 1.79059500  | -2.81536300 |
| C  | 2.82143200  | -1.91018500 | -1.02319500 |
| C  | 3.92096500  | -2.17444300 | 0.00831600  |
| C  | 2.88205100  | -2.91285500 | -2.18094300 |
| H  | 1.86500800  | -2.03985000 | -0.50585000 |
| H  | 3.86599400  | -1.44875300 | 0.82356100  |
| H  | 3.79572500  | -3.17345400 | 0.43590100  |
| H  | 4.91802500  | -2.12632200 | -0.44061000 |
| H  | 2.06165300  | -2.74574800 | -2.88346700 |
| H  | 3.82715000  | -2.81277700 | -2.72541800 |
| H  | 2.81478700  | -3.93685800 | -1.80200900 |
| C  | 2.67107900  | 1.42238000  | 1.69395900  |
| C  | 1.52859100  | 0.74092500  | 1.56760300  |
| Br | 1.34471500  | -1.03150000 | 2.34138600  |
| C  | 0.27656300  | 1.17848100  | 0.89032300  |
| O  | -0.76319700 | 1.52499700  | 1.78340700  |
| H  | 0.29906700  | 2.21503800  | 0.24108800  |
| C  | 3.89057000  | 0.93052000  | 2.42008000  |

|   |             |             |             |
|---|-------------|-------------|-------------|
| H | 4.71138300  | 0.79753800  | 1.70514200  |
| H | 4.21801200  | 1.68275000  | 3.14508900  |
| H | 3.71865600  | -0.00992600 | 2.94184300  |
| C | 2.83370000  | 2.78958300  | 1.07726200  |
| H | 1.93485900  | 3.15605700  | 0.58115700  |
| H | 3.12197600  | 3.50397700  | 1.85635600  |
| H | 3.65022000  | 2.76056000  | 0.34651200  |
| O | -0.50473700 | 3.28573900  | -0.19162800 |
| H | -1.00906100 | 2.40377600  | 1.40341000  |
| H | -0.20714900 | 4.18288700  | -0.00671700 |

**re-TS2<sup>D</sup>**

|   |             |             |             |
|---|-------------|-------------|-------------|
| C | 3.60832600  | -1.84203200 | 0.10672400  |
| C | 2.61195300  | -0.91176900 | 0.38806300  |
| C | 2.38505100  | -0.43561600 | 1.67851000  |
| C | 3.20591200  | -0.91596100 | 2.69610000  |
| C | 4.21711000  | -1.84220900 | 2.42471200  |
| C | 4.42565500  | -2.31371800 | 1.13119900  |
| C | 3.63041400  | -2.20332900 | -1.35783700 |
| C | 2.37847400  | -1.52649300 | -1.97004700 |
| C | 1.83550700  | -0.55868000 | -0.86038200 |
| H | 1.59205400  | 0.28484200  | 1.89972900  |
| H | 3.05781200  | -0.56539900 | 3.71226500  |
| H | 4.84383600  | -2.20304900 | 3.23430800  |
| H | 5.20596500  | -3.04124900 | 0.92769800  |
| H | 3.59570000  | -3.28352800 | -1.53558300 |
| H | 2.63191900  | -0.95464900 | -2.86266400 |
| H | 4.53788200  | -1.83121100 | -1.84366400 |
| H | 1.97061500  | 0.48504800  | -1.14739200 |
| N | 0.40501700  | -0.78846600 | -0.63451100 |
| O | 1.40970900  | -2.45944100 | -2.42785200 |
| C | -0.44135100 | -0.03344200 | 0.11658300  |
| C | -0.11747000 | -2.05370900 | -0.69400700 |
| N | -1.44291200 | -0.87781200 | 0.43353400  |
| N | -1.25009000 | -2.14001700 | -0.07027800 |
| C | 0.68595100  | -3.09884900 | -1.39832500 |
| H | 1.35358400  | -3.59910300 | -0.68127800 |
| H | 0.03457300  | -3.84615300 | -1.85237000 |
| C | -2.67494500 | -0.53049600 | 1.07632400  |
| C | -2.64974400 | -0.26000800 | 2.44180300  |
| C | -3.84588000 | -0.47203300 | 0.31109300  |
| C | -3.83859400 | 0.05075000  | 3.08962000  |
| C | -5.02630800 | -0.17110200 | 0.99697100  |
| C | -5.02761800 | 0.08140900  | 2.36501600  |

|    |             |             |             |
|----|-------------|-------------|-------------|
| H  | -3.83466300 | 0.26760400  | 4.15194800  |
| H  | -5.96104500 | -0.12661100 | 0.44631400  |
| H  | -1.69575000 | -0.25991800 | 2.95570700  |
| H  | -5.96172300 | 0.31506800  | 2.86571900  |
| C  | -3.84991200 | -0.73098100 | -1.18467900 |
| C  | -4.68805600 | 0.30024900  | -1.94677300 |
| C  | -4.33469400 | -2.15602500 | -1.47913300 |
| H  | -2.81762600 | -0.64376600 | -1.54427700 |
| H  | -4.39772600 | 1.32262600  | -1.68946800 |
| H  | -4.55314000 | 0.16368500  | -3.02350600 |
| H  | -5.75538200 | 0.18567900  | -1.73385000 |
| H  | -3.69766800 | -2.89242300 | -0.98392000 |
| H  | -5.36069900 | -2.28749300 | -1.11921300 |
| H  | -4.32448200 | -2.34834400 | -2.55619300 |
| C  | 0.08889100  | 2.59851900  | -1.62531400 |
| C  | 0.42475100  | 2.22326600  | -0.38140900 |
| Br | 2.11637700  | 2.82253200  | 0.33857600  |
| C  | -0.34046100 | 1.34911400  | 0.51299400  |
| O  | -0.24842000 | 1.56510500  | 1.95611300  |
| H  | -1.25109600 | 1.75717200  | 1.15016700  |
| C  | 0.99157500  | 3.42347400  | -2.50703200 |
| H  | 0.54660800  | 3.56375200  | -3.49434700 |
| H  | 1.16977700  | 4.40811500  | -2.06251200 |
| H  | 1.97294900  | 2.95516800  | -2.63121200 |
| C  | -1.24005700 | 2.18620500  | -2.20680200 |
| H  | -1.92311600 | 1.83776000  | -1.42841700 |
| H  | -1.69923500 | 3.02842000  | -2.73495700 |
| H  | -1.11441200 | 1.37888400  | -2.94029700 |

**re-M2**

|   |            |             |             |
|---|------------|-------------|-------------|
| C | 3.93112400 | 1.25798000  | -0.40710400 |
| C | 2.81301300 | 0.42705100  | -0.43297200 |
| C | 2.66262900 | -0.55229500 | -1.41279000 |
| C | 3.64543100 | -0.66616300 | -2.39235200 |
| C | 4.75883200 | 0.17730900  | -2.38325400 |
| C | 4.91354800 | 1.13851600  | -1.38728100 |
| C | 3.90179000 | 2.18523500  | 0.78130400  |
| C | 2.50963300 | 1.98276800  | 1.43065900  |
| C | 1.86486100 | 0.74275200  | 0.70276300  |
| H | 1.81073300 | -1.22559600 | -1.40147000 |
| H | 3.54700000 | -1.42087900 | -3.16567400 |
| H | 5.51586300 | 0.07536600  | -3.15439400 |
| H | 5.78749600 | 1.78336800  | -1.37497300 |
| H | 4.04222900 | 3.23834500  | 0.51477700  |

|    |             |             |             |
|----|-------------|-------------|-------------|
| H  | 2.59737800  | 1.77311000  | 2.49770600  |
| H  | 4.69417700  | 1.93199200  | 1.49281500  |
| H  | 1.78596200  | -0.09730500 | 1.39462200  |
| N  | 0.51672800  | 1.07722500  | 0.24173100  |
| O  | 1.70699800  | 3.15006100  | 1.37340900  |
| C  | -0.45060600 | 0.22831100  | -0.29424200 |
| C  | 0.27696300  | 2.32917400  | -0.29472900 |
| N  | -1.20520800 | 1.05572500  | -1.11745400 |
| N  | -0.75327600 | 2.37598500  | -1.05639800 |
| C  | 1.22009800  | 3.42537900  | 0.07655800  |
| H  | 2.03838300  | 3.48882300  | -0.65619000 |
| H  | 0.69956700  | 4.38341100  | 0.10256200  |
| C  | -2.58937000 | 0.85813100  | -1.42693700 |
| C  | -2.92186200 | 0.34579100  | -2.67816600 |
| C  | -3.57074400 | 1.20330900  | -0.48958800 |
| C  | -4.25458100 | 0.17497000  | -3.02670200 |
| C  | -4.90727200 | 1.02964700  | -0.86662500 |
| C  | -5.24957800 | 0.52383900  | -2.11528900 |
| H  | -4.51580500 | -0.22474200 | -4.00075400 |
| H  | -5.69484400 | 1.29975300  | -0.16861400 |
| H  | -2.11831500 | 0.07766700  | -3.35484200 |
| H  | -6.29560700 | 0.40052800  | -2.37768000 |
| C  | -3.21753500 | 1.78450500  | 0.86740800  |
| C  | -3.98555500 | 1.10409200  | 2.00493400  |
| C  | -3.45203700 | 3.30005700  | 0.87255600  |
| H  | -2.14933700 | 1.61446700  | 1.04478900  |
| H  | -3.86719600 | 0.01677300  | 1.97144100  |
| H  | -3.61775000 | 1.46113800  | 2.97157600  |
| H  | -5.05563800 | 1.32854700  | 1.95700300  |
| H  | -2.86084900 | 3.78189500  | 0.08987500  |
| H  | -4.50947700 | 3.52293400  | 0.69383200  |
| H  | -3.17131800 | 3.72817300  | 1.83980100  |
| C  | 0.16680800  | -1.61606000 | 2.20913100  |
| C  | 0.04578300  | -1.89111900 | 0.89546700  |
| Br | 0.84667200  | -3.51202500 | 0.17649300  |
| C  | -0.63572900 | -1.11522600 | -0.11154000 |
| O  | -1.40938000 | -1.77180100 | -1.05909600 |
| C  | 1.03076500  | -2.37894100 | 3.17373900  |
| H  | 0.40365300  | -2.93773100 | 3.87866700  |
| H  | 1.69819100  | -3.07908500 | 2.67362100  |
| H  | 1.63013600  | -1.68165400 | 3.77057200  |
| C  | -0.57332100 | -0.44616600 | 2.80578600  |
| H  | -1.47608100 | -0.21346000 | 2.23663600  |
| H  | -0.84619500 | -0.66581500 | 3.84259100  |

|   |             |             |             |
|---|-------------|-------------|-------------|
| H | 0.04405100  | 0.46452400  | 2.81809500  |
| H | -2.18267500 | -2.15160300 | -0.62349700 |

**si-TS2**

|   |             |             |             |
|---|-------------|-------------|-------------|
| C | -4.68022800 | 0.06529100  | -0.34601200 |
| C | -3.40604700 | 0.44248400  | 0.06785200  |
| C | -3.06782600 | 1.77625300  | 0.27754800  |
| C | -4.04101000 | 2.74226200  | 0.03252300  |
| C | -5.31983300 | 2.37592000  | -0.39683700 |
| C | -5.65126100 | 1.03573000  | -0.58253200 |
| C | -4.80225300 | -1.43406800 | -0.44440900 |
| C | -3.36658600 | -1.98150600 | -0.24138700 |
| C | -2.50679900 | -0.75664200 | 0.25164700  |
| H | -2.07212500 | 2.02288900  | 0.64115000  |
| H | -3.80657100 | 3.79132900  | 0.18495300  |
| H | -6.06558200 | 3.14381500  | -0.58050900 |
| H | -6.64944400 | 0.75277200  | -0.90537500 |
| H | -5.19722900 | -1.77654000 | -1.40728300 |
| H | -3.33728900 | -2.76165000 | 0.51955200  |
| H | -5.47076500 | -1.82291000 | 0.33048800  |
| H | -2.20175100 | -0.88893300 | 1.28896700  |
| N | -1.27465800 | -0.63201800 | -0.54062500 |
| O | -2.87802500 | -2.62356300 | -1.41299700 |
| C | -0.06175500 | -0.10658000 | -0.22725100 |
| C | -1.21916800 | -1.05037600 | -1.84245700 |
| N | 0.66418800  | -0.26424000 | -1.35642700 |
| N | -0.05172300 | -0.85991000 | -2.36863800 |
| C | -2.42252700 | -1.72606000 | -2.40343100 |
| H | -3.19494400 | -0.98856600 | -2.66877200 |
| H | -2.15463900 | -2.29990900 | -3.29073300 |
| C | 2.06939900  | -0.02828100 | -1.52278400 |
| C | 2.46706900  | 1.19117900  | -2.05958000 |
| C | 2.97794600  | -1.02350500 | -1.13957200 |
| C | 3.82182300  | 1.46253600  | -2.20132700 |
| C | 4.33418100  | -0.72118700 | -1.30106200 |
| C | 4.75376700  | 0.50189400  | -1.81582400 |
| H | 4.14669200  | 2.41756900  | -2.60091300 |
| H | 5.07607800  | -1.45744200 | -1.00758600 |
| H | 1.71015500  | 1.92896500  | -2.30012600 |
| H | 5.81557100  | 0.70511500  | -1.91680800 |
| C | 2.51105600  | -2.37719900 | -0.63483100 |
| C | 3.47254100  | -3.02058100 | 0.36430500  |
| C | 2.27591500  | -3.31275300 | -1.83095200 |
| H | 1.56524100  | -2.24478000 | -0.09966900 |



|    |             |             |             |
|----|-------------|-------------|-------------|
| H  | 3.71190000  | -2.33655100 | 1.18096800  |
| H  | 2.99715400  | -3.89974600 | 0.80559200  |
| H  | 4.40323400  | -3.34296700 | -0.11722900 |
| H  | 1.55456800  | -2.88927200 | -2.53452400 |
| H  | 3.21692000  | -3.48473800 | -2.36632800 |
| H  | 1.89828800  | -4.27861500 | -1.48259000 |
| C  | 2.64203900  | 1.47997500  | 1.47545600  |
| C  | 1.38725200  | 1.41732400  | 1.02728000  |
| Br | 0.65797200  | 3.05049600  | 0.20926600  |
| C  | 0.35295300  | 0.34630300  | 1.10162100  |
| O  | -0.70750100 | 0.66377200  | 1.91582500  |
| H  | 0.78772400  | -0.78637100 | 1.56499100  |
| C  | 3.49634100  | 2.71666900  | 1.34277700  |
| H  | 3.06649300  | 3.55058600  | 1.90723600  |
| H  | 4.50735100  | 2.52836800  | 1.71205400  |
| H  | 3.55641500  | 3.03522300  | 0.29735000  |
| C  | 3.30001600  | 0.29901300  | 2.14095400  |
| H  | 3.69624900  | 0.60792600  | 3.11551500  |
| H  | 2.62633900  | -0.54653200 | 2.28997700  |
| H  | 4.15587100  | -0.02494300 | 1.53459300  |
| H  | -0.84474200 | -0.44840800 | 2.67690200  |
| C  | -0.09030100 | -2.33727500 | 2.91671100  |
| O  | -0.19371700 | -3.45718300 | 3.41780800  |
| O  | 0.90252600  | -1.98824600 | 2.13608500  |
| O  | -1.02966500 | -1.41237600 | 3.15741800  |

**si-TS2<sup>w</sup>**

|   |            |             |             |
|---|------------|-------------|-------------|
| C | 4.71038800 | 0.13098300  | 0.10536400  |
| C | 3.41381600 | -0.31801300 | 0.34026900  |
| C | 3.06669500 | -1.65731400 | 0.18944800  |
| C | 4.05445600 | -2.54950700 | -0.21886200 |
| C | 5.35845800 | -2.10818500 | -0.45747500 |
| C | 5.69677600 | -0.76711700 | -0.29456700 |
| C | 4.83383800 | 1.61239200  | 0.35310600  |
| C | 3.38774500 | 2.11691400  | 0.57792500  |
| C | 2.51085800 | 0.81816500  | 0.75925800  |
| H | 2.04980600 | -1.98957800 | 0.37663600  |
| H | 3.80975300 | -3.59856900 | -0.35011700 |
| H | 6.11562800 | -2.81793200 | -0.77592400 |
| H | 6.71107200 | -0.42664300 | -0.48146400 |
| H | 5.28983900 | 2.15413800  | -0.48214200 |
| H | 3.31158300 | 2.72843900  | 1.47697200  |
| H | 5.44750300 | 1.81344900  | 1.23701700  |
| H | 2.16821400 | 0.72083000  | 1.78717300  |

|    |             |             |             |
|----|-------------|-------------|-------------|
| N  | 1.30259600  | 0.88619000  | -0.07733400 |
| O  | 2.95191100  | 2.97826200  | -0.46309800 |
| C  | 0.06895200  | 0.36218500  | 0.08134300  |
| C  | 1.30538900  | 1.55971900  | -1.27198900 |
| N  | -0.62133300 | 0.78208900  | -0.98862300 |
| N  | 0.14468700  | 1.52338400  | -1.84862600 |
| C  | 2.54411100  | 2.30503000  | -1.63660800 |
| H  | 3.31936300  | 1.61894200  | -2.00649900 |
| H  | 2.32728300  | 3.05017500  | -2.40161500 |
| C  | -2.02714300 | 0.60335300  | -1.22917500 |
| C  | -2.39484100 | -0.33071300 | -2.18932900 |
| C  | -2.95256300 | 1.35157000  | -0.48658900 |
| C  | -3.74414400 | -0.56795400 | -2.42161400 |
| C  | -4.30039900 | 1.08550400  | -0.74629000 |
| C  | -4.69344500 | 0.13921500  | -1.68990700 |
| H  | -4.04885900 | -1.30116000 | -3.16045800 |
| H  | -5.06222600 | 1.62732500  | -0.19636400 |
| H  | -1.62025000 | -0.88588600 | -2.70644800 |
| H  | -5.75053700 | -0.04161700 | -1.85646400 |
| C  | -2.51552500 | 2.42613400  | 0.49921300  |
| C  | -3.61364100 | 2.83787900  | 1.48022200  |
| C  | -2.01992300 | 3.66325500  | -0.26773700 |
| H  | -1.68735700 | 2.04279500  | 1.10818100  |
| H  | -4.04529000 | 1.97652600  | 1.99659200  |
| H  | -3.18669700 | 3.50327800  | 2.23443100  |
| H  | -4.42066700 | 3.38093200  | 0.97670800  |
| H  | -1.20047200 | 3.42344300  | -0.94934800 |
| H  | -2.83761400 | 4.08882600  | -0.85903300 |
| H  | -1.67183900 | 4.42457200  | 0.43585000  |
| C  | -2.63568400 | -1.72181100 | 1.21302200  |
| C  | -1.38395500 | -1.50004500 | 0.80448100  |
| Br | -0.61284000 | -2.72357000 | -0.47857300 |
| C  | -0.44609800 | -0.42112700 | 1.21805100  |
| O  | 0.60761200  | -0.87236400 | 2.03645600  |
| H  | -0.88391400 | 0.39541100  | 2.01090100  |
| C  | -3.46007800 | -2.87302000 | 0.69646500  |
| H  | -2.98173600 | -3.83046700 | 0.92393000  |
| H  | -4.45873300 | -2.86426100 | 1.13735900  |
| H  | -3.55553600 | -2.81076600 | -0.39256400 |
| C  | -3.31688900 | -0.82058900 | 2.20753800  |
| H  | -3.66570400 | -1.41841100 | 3.05700400  |
| H  | -2.67613100 | -0.02277600 | 2.58650300  |
| H  | -4.20474900 | -0.37771900 | 1.74007300  |
| O  | -0.44116200 | 1.08032900  | 3.20156700  |

|   |             |             |            |
|---|-------------|-------------|------------|
| H | -0.98579300 | 0.90485400  | 3.97704600 |
| H | 0.43199400  | -0.23608800 | 2.81541600 |

**si-TS2<sup>D</sup>**

|   |             |             |             |
|---|-------------|-------------|-------------|
| C | 4.88125700  | 0.05385100  | -0.08818000 |
| C | 3.62947800  | -0.53680600 | 0.05416300  |
| C | 3.26105500  | -1.65821600 | -0.68236600 |
| C | 4.17624900  | -2.17328000 | -1.59659200 |
| C | 5.43063700  | -1.57769100 | -1.75841500 |
| C | 5.79515000  | -0.46649800 | -1.00202500 |
| C | 5.05100400  | 1.21849400  | 0.85280000  |
| C | 3.65731900  | 1.44130200  | 1.49233800  |
| C | 2.78390700  | 0.19696800  | 1.07091300  |
| H | 2.29191100  | -2.11952900 | -0.50182500 |
| H | 3.91782900  | -3.04791500 | -2.18476600 |
| H | 6.13141000  | -1.98989200 | -2.47767000 |
| H | 6.77464600  | -0.01338400 | -1.12431500 |
| H | 5.38188300  | 2.13565500  | 0.35391500  |
| H | 3.72115200  | 1.48677400  | 2.57976500  |
| H | 5.79304900  | 0.99319000  | 1.62527200  |
| H | 2.54374000  | -0.44109500 | 1.92017500  |
| N | 1.51577300  | 0.63530000  | 0.48092000  |
| O | 3.09412500  | 2.69149800  | 1.12707900  |
| C | 0.31203300  | -0.00669000 | 0.37896500  |
| C | 1.41899300  | 1.80177800  | -0.22798300 |
| N | -0.43173200 | 0.81057600  | -0.41543700 |
| N | 0.25739700  | 1.95410300  | -0.77170500 |
| C | 2.59176000  | 2.72164800  | -0.19427400 |
| H | 3.35132100  | 2.40730200  | -0.92493100 |
| H | 2.28070400  | 3.74155500  | -0.41982400 |
| C | -1.60521700 | 0.46825600  | -1.16447200 |
| C | -1.53874300 | -0.66702100 | -1.96781700 |
| C | -2.75159600 | 1.26684700  | -1.09328100 |
| C | -2.63941500 | -1.04001400 | -2.72781500 |
| C | -3.83397500 | 0.88233200  | -1.89006800 |
| C | -3.78870600 | -0.25404600 | -2.69102600 |
| H | -2.59456800 | -1.92813000 | -3.34967100 |
| H | -4.74087100 | 1.47829800  | -1.86814500 |
| H | -0.62185700 | -1.25006600 | -1.98139200 |
| H | -4.65368200 | -0.52698900 | -3.28685700 |
| C | -2.82553500 | 2.49222700  | -0.20267300 |
| C | -4.17930800 | 2.61305000  | 0.50426100  |
| C | -2.52791100 | 3.76282400  | -1.01020600 |
| H | -2.05494100 | 2.37778500  | 0.56801500  |

|    |             |             |             |
|----|-------------|-------------|-------------|
| H  | -4.45252000 | 1.67651000  | 0.99670300  |
| H  | -4.13339200 | 3.40423800  | 1.25782100  |
| H  | -4.97612700 | 2.87830300  | -0.19791300 |
| H  | -1.54341300 | 3.70704000  | -1.47843700 |
| H  | -3.28125600 | 3.89486600  | -1.79452400 |
| H  | -2.55914200 | 4.64219200  | -0.35948000 |
| C  | -1.89640900 | -2.81470400 | 0.42666700  |
| C  | -1.45131700 | -1.67900000 | 0.97151300  |
| Br | -2.68165400 | -0.45401900 | 1.82842000  |
| C  | -0.05811200 | -1.19404400 | 1.07629600  |
| O  | 1.01046700  | -2.13140600 | 1.38620900  |
| H  | 0.40836600  | -1.23998600 | 2.15649500  |
| C  | -3.32732000 | -3.26234500 | 0.40316000  |
| H  | -3.68879800 | -3.24404900 | -0.63303000 |
| H  | -3.40879200 | -4.29634600 | 0.75464000  |
| H  | -3.97650900 | -2.62678900 | 1.00365600  |
| C  | -0.92839200 | -3.70218500 | -0.31256900 |
| H  | 0.10733300  | -3.44169800 | -0.08543500 |
| H  | -1.09702700 | -4.74988000 | -0.04134700 |
| H  | -1.11067100 | -3.62010600 | -1.39219400 |

**si-M2**

|   |             |             |             |
|---|-------------|-------------|-------------|
| C | -4.56974000 | 0.48198400  | -0.69230800 |
| C | -3.38057000 | 0.71223700  | -0.00469400 |
| C | -2.75346300 | 1.95647600  | -0.04565400 |
| C | -3.33950800 | 2.97050600  | -0.79918400 |
| C | -4.53275900 | 2.74418100  | -1.48964800 |
| C | -5.15646500 | 1.50048600  | -1.43910100 |
| C | -5.06044000 | -0.92877700 | -0.48842800 |
| C | -3.93051700 | -1.65436200 | 0.28452000  |
| C | -2.91620600 | -0.53214700 | 0.72101100  |
| H | -1.82698500 | 2.13682500  | 0.49424100  |
| H | -2.86652200 | 3.94595700  | -0.84960500 |
| H | -4.97661800 | 3.54585400  | -2.07145100 |
| H | -6.08411900 | 1.32645700  | -1.97673900 |
| H | -5.26600900 | -1.45162100 | -1.42872300 |
| H | -4.31898800 | -2.15517800 | 1.17186100  |
| H | -5.98918900 | -0.94207100 | 0.09081600  |
| H | -2.94148500 | -0.39447400 | 1.80057800  |
| N | -1.55204600 | -0.90527000 | 0.35459100  |
| O | -3.34039600 | -2.70111300 | -0.46915500 |
| C | -0.35282100 | -0.31199100 | 0.74678200  |
| C | -1.30044600 | -1.58554000 | -0.81172500 |
| N | 0.57368500  | -0.77876700 | -0.19564700 |

|            |             |             |             |
|------------|-------------|-------------|-------------|
| N          | -0.06959500 | -1.56138600 | -1.17063300 |
| C          | -2.46182800 | -2.24671500 | -1.47755500 |
| H          | -2.95954700 | -1.53485100 | -2.15359600 |
| H          | -2.13156200 | -3.10887400 | -2.05716600 |
| C          | 1.71807900  | -0.05443400 | -0.65717000 |
| C          | 1.65034000  | 1.33628500  | -0.74533800 |
| C          | 2.87602100  | -0.74962600 | -1.03772400 |
| C          | 2.75254500  | 2.06799900  | -1.16301300 |
| C          | 3.96028100  | 0.01111400  | -1.49030900 |
| C          | 3.91377900  | 1.39989600  | -1.54431300 |
| H          | 2.69637700  | 3.15102000  | -1.20045800 |
| H          | 4.86672800  | -0.50114000 | -1.80014600 |
| H          | 0.73526200  | 1.84008200  | -0.45073700 |
| H          | 4.78068000  | 1.95784400  | -1.88353800 |
| C          | 2.95960200  | -2.26549000 | -1.00938900 |
| C          | 4.28278300  | -2.77005900 | -0.42146200 |
| C          | 2.75424600  | -2.83541700 | -2.41945700 |
| H          | 2.14080600  | -2.62866100 | -0.37900900 |
| H          | 4.50091800  | -2.31164000 | 0.54778000  |
| H          | 4.23973500  | -3.85455000 | -0.28631800 |
| H          | 5.12380400  | -2.55906800 | -1.08931300 |
| H          | 1.78917100  | -2.52380700 | -2.82267600 |
| H          | 3.54618800  | -2.48323100 | -3.08975800 |
| H          | 2.79020500  | -3.92922200 | -2.39742800 |
| C          | 2.30000800  | 0.45589000  | 2.38845200  |
| C          | 1.11522500  | 1.04353700  | 2.19415900  |
| Br         | 0.97597500  | 3.01332300  | 2.15919300  |
| C          | -0.15397700 | 0.44994600  | 1.86305400  |
| O          | -1.26380100 | 0.80724500  | 2.62376900  |
| C          | 3.62455900  | 1.15714500  | 2.39731500  |
| H          | 3.52206500  | 2.24096600  | 2.36657300  |
| H          | 4.20609700  | 0.87252300  | 3.27990900  |
| H          | 4.19189800  | 0.83820300  | 1.51243500  |
| C          | 2.36032000  | -1.04484000 | 2.50188800  |
| H          | 3.07901900  | -1.33228300 | 3.27593600  |
| H          | 1.38477000  | -1.47383500 | 2.73515100  |
| H          | 2.70520400  | -1.47788300 | 1.55608900  |
| H          | -1.19187800 | 1.75910500  | 2.80002900  |
| <b>TS3</b> |             |             |             |
| C          | 4.66096100  | -0.37540400 | 0.05432300  |
| C          | 3.39263200  | 0.17007000  | -0.12680700 |
| C          | 3.00113900  | 1.33933400  | 0.51901800  |
| C          | 3.92148000  | 1.96598000  | 1.35586500  |

|   |             |             |             |
|---|-------------|-------------|-------------|
| C | 5.19989500  | 1.43138000  | 1.53575000  |
| C | 5.57854000  | 0.25772600  | 0.88817200  |
| C | 4.83017000  | -1.64598800 | -0.74033800 |
| C | 3.42029600  | -1.98272700 | -1.28442100 |
| C | 2.56818100  | -0.67833700 | -1.06867000 |
| H | 2.00393600  | 1.75823700  | 0.39460700  |
| H | 3.63979300  | 2.87707300  | 1.87348800  |
| H | 5.90293500  | 1.93254300  | 2.19358700  |
| H | 6.56950000  | -0.16087500 | 1.03788300  |
| H | 5.20648100  | -2.48287000 | -0.14289600 |
| H | 3.44987200  | -2.23029600 | -2.34585300 |
| H | 5.53259200  | -1.50169600 | -1.56764100 |
| H | 2.38749900  | -0.17183400 | -2.01451700 |
| N | 1.26397700  | -1.00012500 | -0.48346400 |
| O | 2.86544300  | -3.14002200 | -0.67696100 |
| C | 0.07808700  | -0.31587400 | -0.49020100 |
| C | 1.14790400  | -2.01301700 | 0.43252600  |
| N | -0.69103600 | -0.98628700 | 0.41008700  |
| N | -0.02172200 | -2.04955600 | 0.97723700  |
| C | 2.32288600  | -2.91633500 | 0.60854300  |
| H | 3.05856800  | -2.46268400 | 1.28851500  |
| H | 2.00462900  | -3.87556000 | 1.01696600  |
| C | -2.01650100 | -0.69306500 | 0.86355900  |
| C | -2.22081200 | 0.48379700  | 1.58365700  |
| C | -3.04673900 | -1.60094500 | 0.59706300  |
| C | -3.49116300 | 0.77689700  | 2.05812100  |
| C | -4.31195600 | -1.28549400 | 1.10733100  |
| C | -4.53606100 | -0.11755800 | 1.82595700  |
| H | -3.66380800 | 1.70001600  | 2.60101400  |
| H | -5.13660100 | -1.97014900 | 0.93310700  |
| H | -1.40407400 | 1.19212300  | 1.69577200  |
| H | -5.53054800 | 0.09869100  | 2.20338200  |
| C | -2.81828100 | -2.88702700 | -0.17644300 |
| C | -3.89989100 | -3.13204100 | -1.23273400 |
| C | -2.72405100 | -4.07358200 | 0.79194900  |
| H | -1.85894000 | -2.80074700 | -0.69761300 |
| H | -3.99633200 | -2.28088400 | -1.91224200 |
| H | -3.64537900 | -4.01591100 | -1.82421300 |
| H | -4.87628900 | -3.31603200 | -0.77459800 |
| H | -1.92255200 | -3.91840600 | 1.51737900  |
| H | -3.66701400 | -4.19422000 | 1.33615900  |
| H | -2.52784400 | -4.99956500 | 0.24298200  |
| C | -2.64451800 | 1.73293700  | -1.33610800 |
| C | -1.35600700 | 1.56171400  | -1.11361300 |

|    |             |            |             |
|----|-------------|------------|-------------|
| Br | -0.38400200 | 3.39418000 | 0.14318500  |
| C  | -0.24457400 | 0.78653300 | -1.31133000 |
| O  | 0.81257000  | 1.33862600 | -2.02651500 |
| C  | -3.53707800 | 2.78247600 | -0.74427700 |
| H  | -3.01553500 | 3.38322500 | -0.00261500 |
| H  | -3.90880100 | 3.43510800 | -1.54219700 |
| H  | -4.40573800 | 2.29969600 | -0.28389300 |
| C  | -3.33463800 | 0.73681200 | -2.24307000 |
| H  | -3.87088500 | 1.26007900 | -3.04170100 |
| H  | -2.62815400 | 0.03116100 | -2.68235600 |
| H  | -4.07370200 | 0.18013000 | -1.65383000 |
| H  | 0.89441700  | 2.25072900 | -1.68230300 |

### M3

|   |             |             |             |
|---|-------------|-------------|-------------|
| C | 4.65702100  | -0.62639700 | -0.20753900 |
| C | 3.41625900  | 0.00636300  | -0.22769700 |
| C | 3.18164600  | 1.18628500  | 0.47009800  |
| C | 4.23725900  | 1.73419100  | 1.19571700  |
| C | 5.48761800  | 1.11311400  | 1.21693100  |
| C | 5.70748600  | -0.07235100 | 0.51735700  |
| C | 4.63901200  | -1.88425000 | -1.03985600 |
| C | 3.14493300  | -2.15154200 | -1.32597600 |
| C | 2.43882200  | -0.76938300 | -1.08437300 |
| H | 2.20985200  | 1.67741600  | 0.47078200  |
| H | 4.07792500  | 2.65478900  | 1.74742800  |
| H | 6.29656700  | 1.55537100  | 1.78992700  |
| H | 6.67845800  | -0.55807400 | 0.54401800  |
| H | 5.08194800  | -2.75028200 | -0.53915200 |
| H | 2.97856900  | -2.48886100 | -2.34980600 |
| H | 5.18161100  | -1.73780400 | -1.98007200 |
| H | 2.21852800  | -0.25606200 | -2.02046500 |
| N | 1.16581500  | -0.96897900 | -0.38138600 |
| O | 2.62263300  | -3.20353500 | -0.52354700 |
| C | -0.01869200 | -0.32917000 | -0.44606300 |
| C | 1.06664500  | -1.90262000 | 0.61293500  |
| N | -0.76894500 | -0.88553800 | 0.51080900  |
| N | -0.10719600 | -1.88371500 | 1.16877400  |
| C | 2.22330700  | -2.83184200 | 0.78321400  |
| H | 3.03468100  | -2.34815800 | 1.34264100  |
| H | 1.90849300  | -3.73308200 | 1.30895900  |
| C | -2.07142000 | -0.47797400 | 0.96927700  |
| C | -2.15902600 | 0.75896100  | 1.60098200  |
| C | -3.15782600 | -1.33657400 | 0.79599300  |
| C | -3.38753000 | 1.15609600  | 2.11274200  |

|    |             |             |             |
|----|-------------|-------------|-------------|
| C  | -4.37630300 | -0.90680100 | 1.33176000  |
| C  | -4.49132500 | 0.31477700  | 1.98835700  |
| H  | -3.47852400 | 2.12159300  | 2.59845500  |
| H  | -5.25041700 | -1.54408200 | 1.23444500  |
| H  | -1.29089200 | 1.41511600  | 1.63184400  |
| H  | -5.45159400 | 0.61627200  | 2.39467900  |
| C  | -3.03891000 | -2.66890300 | 0.08085800  |
| C  | -4.12105400 | -2.83511700 | -0.99015500 |
| C  | -3.07259700 | -3.82242300 | 1.09036200  |
| H  | -2.06832400 | -2.69638600 | -0.42670500 |
| H  | -4.10623600 | -2.00074500 | -1.69693400 |
| H  | -3.95711000 | -3.76262600 | -1.54578500 |
| H  | -5.11940000 | -2.88941100 | -0.54568400 |
| H  | -2.26772500 | -3.72094300 | 1.82249100  |
| H  | -4.02648900 | -3.83226700 | 1.62813900  |
| H  | -2.96157200 | -4.78244200 | 0.57784200  |
| C  | -2.85525200 | 1.34650700  | -1.96135700 |
| C  | -1.63518200 | 0.95524000  | -1.70680400 |
| Br | 0.11653500  | 3.36537100  | 0.42836800  |
| C  | -0.37693400 | 0.72076900  | -1.39910700 |
| O  | 0.68732000  | 1.43497000  | -1.87676600 |
| C  | -3.46060200 | 2.43711600  | -1.10867200 |
| H  | -2.70462800 | 2.87781200  | -0.45408700 |
| H  | -3.87053000 | 3.21397400  | -1.76255300 |
| H  | -4.28198500 | 2.03014100  | -0.50962400 |
| C  | -3.69667600 | 0.76837900  | -3.06783600 |
| H  | -3.96671700 | 1.55781400  | -3.77621200 |
| H  | -3.17905300 | -0.02780500 | -3.60410200 |
| H  | -4.62880700 | 0.37285400  | -2.65030800 |
| H  | 0.67322300  | 2.26933500  | -1.31480900 |

**TS3'**

|   |            |             |             |
|---|------------|-------------|-------------|
| C | 4.48400700 | 0.20079400  | -0.54018400 |
| C | 3.34475700 | -0.35398800 | 0.03890900  |
| C | 2.86500600 | -1.60134600 | -0.36120300 |
| C | 3.53143400 | -2.26537600 | -1.38910200 |
| C | 4.66232700 | -1.70431000 | -1.98693100 |
| C | 5.15261500 | -0.47328900 | -1.55897900 |
| C | 4.85238400 | 1.51504300  | 0.09741500  |
| C | 3.76587500 | 1.76443300  | 1.17518500  |
| C | 2.75857500 | 0.55917400  | 1.09433700  |
| H | 2.01097300 | -2.05052400 | 0.13779400  |
| H | 3.17407100 | -3.23516500 | -1.72086700 |
| H | 5.17077000 | -2.23810700 | -2.78389400 |



|    |             |             |             |
|----|-------------|-------------|-------------|
| H  | 6.04445600  | -0.04752500 | -2.01009200 |
| H  | 4.88206400  | 2.34135500  | -0.62110900 |
| H  | 4.21163300  | 1.77285000  | 2.17042600  |
| H  | 5.84425100  | 1.47072600  | 0.55707600  |
| H  | 2.64042800  | 0.03873800  | 2.04632800  |
| N  | 1.42821600  | 1.04785500  | 0.72433800  |
| O  | 3.15274700  | 3.03953300  | 1.06316900  |
| C  | 0.25612400  | 0.29853300  | 0.65694400  |
| C  | 1.20617000  | 2.20303200  | 0.03345200  |
| N  | -0.62899100 | 1.12841300  | -0.04090600 |
| N  | 0.00922000  | 2.31233000  | -0.43325600 |
| C  | 2.33436800  | 3.17502000  | -0.07855900 |
| H  | 2.89420300  | 2.98894700  | -1.00615300 |
| H  | 1.95400100  | 4.19662800  | -0.10257100 |
| C  | -1.74590200 | 0.69304100  | -0.79654900 |
| C  | -1.65086000 | -0.51210800 | -1.49375600 |
| C  | -2.92117400 | 1.46591800  | -0.83182300 |
| C  | -2.73448000 | -0.99127700 | -2.21889800 |
| C  | -3.98152300 | 0.97697000  | -1.59757400 |
| C  | -3.90295000 | -0.23806200 | -2.27756700 |
| H  | -2.65519200 | -1.94043100 | -2.73899900 |
| H  | -4.89908400 | 1.55572300  | -1.65430000 |
| H  | -0.72140600 | -1.06993500 | -1.44752200 |
| H  | -4.75473200 | -0.59079800 | -2.85019900 |
| C  | -3.04472600 | 2.78383900  | -0.09036300 |
| C  | -4.36466300 | 2.88984800  | 0.68084900  |
| C  | -2.88380100 | 3.95846900  | -1.06373600 |
| H  | -2.22234100 | 2.83844100  | 0.63057500  |
| H  | -4.36586500 | 3.79417300  | 1.29567000  |
| H  | -5.22234600 | 2.95384900  | 0.00424700  |
| H  | -4.51764500 | 2.02773300  | 1.33803900  |
| H  | -1.91450100 | 3.90792800  | -1.56406500 |
| H  | -3.67344700 | 3.93584300  | -1.82275500 |
| H  | -2.95372500 | 4.91025500  | -0.52823500 |
| C  | -2.38520300 | -1.22783400 | 1.53290400  |
| C  | -1.11137300 | -1.76862500 | 1.24080000  |
| Br | -0.98281200 | -3.33442800 | 0.07351300  |
| C  | 0.08775600  | -0.91968400 | 1.27377100  |
| O  | 0.94237600  | -1.45488700 | 2.15250100  |
| C  | -3.67159900 | -1.73116500 | 0.99295500  |
| H  | -4.14980900 | -0.93560400 | 0.40132200  |
| H  | -3.54458200 | -2.60895200 | 0.36199200  |
| H  | -4.35393600 | -1.95547200 | 1.82196600  |
| C  | -2.43030100 | -0.05052500 | 2.44355500  |

|   |             |             |            |
|---|-------------|-------------|------------|
| H | -3.36457100 | -0.02382500 | 3.01115200 |
| H | -1.56248200 | -0.03325600 | 3.10924400 |
| H | -2.37448500 | 0.87522700  | 1.84508000 |
| H | -0.43547100 | -2.15034600 | 2.21521700 |

**M3'**

|   |             |             |             |
|---|-------------|-------------|-------------|
| C | 4.38623700  | 0.88820300  | 0.43482200  |
| C | 3.29452200  | 0.13556900  | -0.00316800 |
| C | 3.44047600  | -0.84629600 | -0.97450900 |
| C | 4.71447600  | -1.08579500 | -1.48961500 |
| C | 5.81249700  | -0.35408900 | -1.03808800 |
| C | 5.65533700  | 0.64120300  | -0.07339200 |
| C | 3.94381400  | 1.92850300  | 1.43692400  |
| C | 2.43517900  | 2.04293300  | 1.17320700  |
| C | 2.04013400  | 0.61042600  | 0.70683700  |
| H | 2.58291000  | -1.41155100 | -1.32117700 |
| H | 4.85040600  | -1.84540600 | -2.25233600 |
| H | 6.79625300  | -0.55029200 | -1.45252400 |
| H | 6.50749800  | 1.22624300  | 0.25946600  |
| H | 4.43163400  | 2.89799100  | 1.31380900  |
| H | 1.85338200  | 2.33125100  | 2.05043200  |
| H | 4.12111600  | 1.58564400  | 2.46331600  |
| H | 1.76010100  | 0.00221700  | 1.57195000  |
| N | 0.86521400  | 0.70163200  | -0.14353100 |
| O | 2.17680900  | 3.04581000  | 0.18516600  |
| C | -0.34911700 | 0.13297000  | -0.00893900 |
| C | 0.77215100  | 1.68360300  | -1.08424600 |
| N | -1.11041300 | 0.76175000  | -0.91179200 |
| N | -0.42343900 | 1.73724100  | -1.59259100 |
| C | 1.91831300  | 2.63878700  | -1.15155100 |
| H | 2.79446000  | 2.17812400  | -1.62209600 |
| H | 1.63027000  | 3.52986400  | -1.70897100 |
| C | -2.50360300 | 0.55838100  | -1.21048700 |
| C | -2.79461700 | -0.00752300 | -2.44587800 |
| C | -3.48794500 | 0.92730300  | -0.28376200 |
| C | -4.11564600 | -0.26851400 | -2.78421200 |
| C | -4.80679800 | 0.63729700  | -0.65245100 |
| C | -5.11966900 | 0.04424300  | -1.87257000 |
| H | -4.35411400 | -0.72028100 | -3.74056500 |
| H | -5.61106800 | 0.88666100  | 0.03045800  |
| H | -1.97860400 | -0.25655000 | -3.11684300 |
| H | -6.15675000 | -0.16516100 | -2.11444000 |
| C | -3.14958800 | 1.66503600  | 1.00041500  |
| C | -4.28685100 | 1.65462700  | 2.02137600  |

|    |             |             |             |
|----|-------------|-------------|-------------|
| C  | -2.76213100 | 3.11539700  | 0.66703200  |
| H  | -2.28499400 | 1.18429600  | 1.47678000  |
| H  | -3.93013100 | 2.08687000  | 2.95936300  |
| H  | -5.14204000 | 2.25221200  | 1.68596300  |
| H  | -4.63672700 | 0.63979600  | 2.23186400  |
| H  | -1.91482500 | 3.16448700  | -0.02232900 |
| H  | -3.60514900 | 3.63949900  | 0.20349000  |
| H  | -2.48701600 | 3.64709000  | 1.58229800  |
| C  | -1.69271700 | -1.83755600 | 1.15883600  |
| C  | -0.21696300 | -2.09168100 | 1.35251900  |
| Br | 0.78060100  | -3.01532000 | -0.02010400 |
| C  | -0.70520000 | -0.65494000 | 1.22488200  |
| O  | -0.60039000 | 0.16707500  | 2.24793900  |
| C  | -2.32407600 | -2.34496300 | -0.11957900 |
| H  | -3.31471600 | -1.90420000 | -0.26585200 |
| H  | -1.71573000 | -2.13182500 | -1.00116100 |
| H  | -2.43309000 | -3.43426000 | -0.05620900 |
| C  | -2.56424000 | -1.98331500 | 2.38554400  |
| H  | -2.70088700 | -3.03632200 | 2.65286200  |
| H  | -2.11735700 | -1.44067300 | 3.22102900  |
| H  | -3.55186600 | -1.55121900 | 2.18786000  |
| H  | 0.15125700  | -2.35460500 | 2.33807700  |

**TS4'**

|   |             |             |             |
|---|-------------|-------------|-------------|
| C | -4.57949400 | -0.06770400 | -0.68456400 |
| C | -3.60286900 | 0.62294700  | 0.03384200  |
| C | -3.36016700 | 1.97509900  | -0.18746700 |
| C | -4.12437900 | 2.63328700  | -1.14904200 |
| C | -5.10982700 | 1.95062800  | -1.86467000 |
| C | -5.34538800 | 0.59625700  | -1.63704300 |
| C | -4.62581200 | -1.52176500 | -0.29458500 |
| C | -3.81315600 | -1.56127800 | 1.01869600  |
| C | -2.90281400 | -0.29609700 | 1.01128900  |
| H | -2.59563900 | 2.49020500  | 0.38634200  |
| H | -3.95593100 | 3.68836600  | -1.33851600 |
| H | -5.70000300 | 2.48103500  | -2.60536200 |
| H | -6.11390600 | 0.06839700  | -2.19396100 |
| H | -4.16567400 | -2.14030800 | -1.07336000 |
| H | -4.49811500 | -1.45468900 | 1.86244800  |
| H | -5.63951000 | -1.90082800 | -0.14491300 |
| H | -2.78513500 | 0.14800600  | 2.00295900  |
| N | -1.56382100 | -0.67400000 | 0.54692900  |
| O | -3.11635400 | -2.76596100 | 1.26877800  |
| C | -0.44111100 | 0.13071500  | 0.49560700  |

|            |             |             |             |
|------------|-------------|-------------|-------------|
| C          | -1.16518100 | -1.91772800 | 0.20923900  |
| N          | 0.56214200  | -0.67406100 | -0.01927000 |
| N          | 0.08542500  | -1.97183800 | -0.16573900 |
| C          | -2.11529300 | -3.06825600 | 0.32125600  |
| H          | -2.53583600 | -3.31237400 | -0.66227600 |
| H          | -1.57403800 | -3.94273500 | 0.68537800  |
| C          | 1.47678400  | -0.23444300 | -1.05671400 |
| C          | 1.10975900  | 0.89143800  | -1.79038900 |
| C          | 2.65879500  | -0.94087100 | -1.33166600 |
| C          | 1.94194500  | 1.37464800  | -2.78962600 |
| C          | 3.46904700  | -0.42950000 | -2.34916200 |
| C          | 3.13241900  | 0.71444500  | -3.06556100 |
| H          | 1.65834800  | 2.26384600  | -3.34176900 |
| H          | 4.39323000  | -0.94627400 | -2.58809100 |
| H          | 0.17917600  | 1.39769100  | -1.55582600 |
| H          | 3.79737600  | 1.08099500  | -3.84059000 |
| C          | 3.05092600  | -2.23696400 | -0.64188200 |
| C          | 4.55951600  | -2.35049400 | -0.38676400 |
| C          | 2.59184400  | -3.43812800 | -1.48336700 |
| H          | 2.53181900  | -2.27837900 | 0.32045800  |
| H          | 4.75505000  | -3.18548100 | 0.29261200  |
| H          | 5.10279700  | -2.55792500 | -1.31376700 |
| H          | 4.97810300  | -1.44263900 | 0.05263400  |
| H          | 1.51329200  | -3.41729100 | -1.64057300 |
| H          | 3.09163100  | -3.42040900 | -2.45795600 |
| H          | 2.85867300  | -4.37451600 | -0.98288000 |
| C          | 1.90638700  | -0.10750400 | 1.94727500  |
| C          | 1.26461500  | 1.18968100  | 1.87420100  |
| Br         | 2.45764800  | 2.60550100  | 0.64166000  |
| C          | -0.17002600 | 1.19848300  | 1.42906100  |
| O          | -0.99756000 | 2.00714900  | 1.85301600  |
| C          | 3.39552900  | -0.16775800 | 1.97177700  |
| H          | 3.78937800  | 0.20953900  | 1.02017500  |
| H          | 3.80785800  | 0.49190900  | 2.74859400  |
| H          | 3.75251100  | -1.18470300 | 2.15073300  |
| C          | 1.18027900  | -1.24926700 | 2.59151100  |
| H          | 1.40356100  | -1.24626100 | 3.66790100  |
| H          | 0.09308400  | -1.17619200 | 2.51006200  |
| H          | 1.51014600  | -2.21801700 | 2.19529600  |
| H          | 1.36121000  | 1.85707900  | 2.73084200  |
| <b>M4'</b> |             |             |             |
| C          | 4.57996100  | -0.24052500 | -0.06110600 |
| C          | 3.41356300  | 0.51210700  | 0.04940300  |

|   |             |             |             |
|---|-------------|-------------|-------------|
| C | 3.25879300  | 1.48119700  | 1.03617500  |
| C | 4.30631100  | 1.68312500  | 1.92972900  |
| C | 5.48002400  | 0.93219400  | 1.82712100  |
| C | 5.62757000  | -0.03079500 | 0.83185900  |
| C | 4.50303200  | -1.20814400 | -1.21403200 |
| C | 3.02281000  | -1.19685400 | -1.65324400 |
| C | 2.41476500  | 0.11003900  | -1.01323500 |
| H | 2.34856800  | 2.06922500  | 1.09789900  |
| H | 4.21175000  | 2.43103000  | 2.70953300  |
| H | 6.28609000  | 1.10103600  | 2.53341800  |
| H | 6.54151300  | -0.61185700 | 0.75813100  |
| H | 4.80411500  | -2.22697600 | -0.95317100 |
| H | 2.91549500  | -1.16861900 | -2.73747700 |
| H | 5.14388300  | -0.88302400 | -2.03965900 |
| H | 2.25102300  | 0.89021400  | -1.75931700 |
| N | 1.10976600  | -0.20264200 | -0.40513600 |
| O | 2.33222100  | -2.37569500 | -1.26559300 |
| C | -0.01128600 | 0.51772200  | -0.27186400 |
| C | 0.90597100  | -1.38129400 | 0.25627800  |
| N | -0.83375700 | -0.21674300 | 0.47960100  |
| N | -0.27238400 | -1.40943100 | 0.81271100  |
| C | 1.95596600  | -2.43358300 | 0.09699400  |
| H | 2.79999500  | -2.25531400 | 0.77582200  |
| H | 1.53426900  | -3.41908700 | 0.29234800  |
| C | -2.10192900 | 0.19397500  | 1.02678400  |
| C | -2.12307500 | 1.43596700  | 1.66120300  |
| C | -3.23044300 | -0.62687100 | 0.91491500  |
| C | -3.31317600 | 1.90984000  | 2.19114200  |
| C | -4.40871600 | -0.11892800 | 1.47477800  |
| C | -4.45889700 | 1.12388400  | 2.09499600  |
| H | -3.34071300 | 2.87355300  | 2.68629100  |
| H | -5.31182900 | -0.71788700 | 1.42247900  |
| H | -1.20701400 | 2.01341200  | 1.75064100  |
| H | -5.39548800 | 1.47716900  | 2.51269600  |
| C | -3.21661700 | -2.00818900 | 0.28245400  |
| C | -4.45759400 | -2.27117800 | -0.57915800 |
| C | -3.08850300 | -3.08078200 | 1.37337800  |
| H | -2.33568300 | -2.08356900 | -0.36362500 |
| H | -4.32395800 | -3.20096800 | -1.13757100 |
| H | -5.35377600 | -2.38984200 | 0.03616300  |
| H | -4.64819000 | -1.46445400 | -1.29383900 |
| H | -2.17688000 | -2.94041800 | 1.95730500  |
| H | -3.94712500 | -3.03455900 | 2.05062400  |
| H | -3.06565900 | -4.07575400 | 0.92008100  |

|   |             |             |             |
|---|-------------|-------------|-------------|
| C | -2.28100300 | 1.50789900  | -2.16849800 |
| C | -1.45553100 | 2.30230500  | -1.45858400 |
| C | -0.20038100 | 1.92186500  | -0.81791100 |
| O | 0.72950500  | 2.67942300  | -0.62238100 |
| C | -3.56000200 | 2.06647400  | -2.71622900 |
| H | -4.40036300 | 1.45814200  | -2.36199800 |
| H | -3.72136000 | 3.10136300  | -2.41424200 |
| H | -3.56430800 | 2.00689800  | -3.80918200 |
| C | -2.03961200 | 0.06572500  | -2.51279500 |
| H | -2.26042700 | -0.08742600 | -3.57318000 |
| H | -1.02255600 | -0.28588100 | -2.33604400 |
| H | -2.73653400 | -0.56880400 | -1.95508400 |
| H | -1.67602900 | 3.36121700  | -1.35880000 |

**TS4**

|   |             |             |             |
|---|-------------|-------------|-------------|
| C | 4.21856500  | 0.56682800  | 0.27987900  |
| C | 3.16095400  | 0.95972200  | -0.54896100 |
| C | 2.70779300  | 2.27710300  | -0.55787200 |
| C | 3.29979100  | 3.18678900  | 0.31710300  |
| C | 4.32865000  | 2.78835800  | 1.17093500  |
| C | 4.80450600  | 1.47806500  | 1.15007500  |
| C | 4.58407600  | -0.87712200 | 0.04788000  |
| C | 3.93602700  | -1.15124400 | -1.32705600 |
| C | 2.69798700  | -0.22033200 | -1.37615000 |
| H | 1.91288200  | 2.58783100  | -1.22534800 |
| H | 2.95855700  | 4.21629100  | 0.32741900  |
| H | 4.77696400  | 3.51109500  | 1.84489600  |
| H | 5.62655600  | 1.17845500  | 1.79274400  |
| H | 4.15656600  | -1.51210900 | 0.83325400  |
| H | 4.61491500  | -0.81707200 | -2.11428100 |
| H | 5.66068200  | -1.05796200 | 0.03361000  |
| H | 2.35708700  | 0.02141100  | -2.38227400 |
| N | 1.59324400  | -0.96583200 | -0.70461900 |
| O | 3.63910000  | -2.49572100 | -1.63268900 |
| C | 0.41526200  | -0.49320200 | -0.26050000 |
| C | 1.65159400  | -2.28186000 | -0.33578000 |
| N | -0.17999200 | -1.50721800 | 0.35900700  |
| N | 0.58030500  | -2.63477500 | 0.31926800  |
| C | 2.82399000  | -3.14658400 | -0.68761300 |
| H | 3.37523200  | -3.41309000 | 0.22249100  |
| H | 2.46380800  | -4.06763200 | -1.14901400 |
| C | -1.44307600 | -1.52814100 | 1.06342300  |
| C | -1.34717800 | -1.74270000 | 2.43330200  |
| C | -2.65727100 | -1.34163400 | 0.38877000  |

|   |             |             |             |
|---|-------------|-------------|-------------|
| C | -2.50443900 | -1.75772500 | 3.20104800  |
| C | -3.79637700 | -1.34442200 | 1.20007700  |
| C | -3.72860500 | -1.54552800 | 2.57613000  |
| H | -2.44600900 | -1.92267800 | 4.27102100  |
| H | -4.76464300 | -1.18293000 | 0.74339400  |
| H | -0.36894600 | -1.89061800 | 2.87945200  |
| H | -4.64265600 | -1.53771200 | 3.16026000  |
| C | -2.74889100 | -1.17622600 | -1.12313900 |
| C | -4.16741100 | -0.87650700 | -1.60941900 |
| C | -2.22458600 | -2.42929000 | -1.84394200 |
| H | -2.13306000 | -0.31602200 | -1.41503800 |
| H | -4.59846200 | -0.00966100 | -1.10583600 |
| H | -4.13932900 | -0.65380200 | -2.67870900 |
| H | -4.82134800 | -1.74312000 | -1.46121700 |
| H | -1.18973900 | -2.67500500 | -1.59328500 |
| H | -2.84254100 | -3.29385500 | -1.58217200 |
| H | -2.28402200 | -2.28349700 | -2.92549000 |
| C | -0.70267400 | 1.63165600  | 1.73583700  |
| C | -0.95402000 | 1.50249700  | 0.42216600  |
| C | -0.11612800 | 0.89989600  | -0.55040100 |
| O | 0.09433100  | 1.26652200  | -1.71168700 |
| C | 0.64029900  | 1.41675800  | 2.38805700  |
| H | 1.04053700  | 2.36791200  | 2.75865400  |
| H | 0.53468700  | 0.75917100  | 3.25946000  |
| H | 1.38742000  | 0.99921300  | 1.70580000  |
| C | -1.80113400 | 2.05058200  | 2.67545000  |
| H | -1.53097700 | 2.96567500  | 3.21510700  |
| H | -2.73695100 | 2.21233500  | 2.13856700  |
| H | -1.95456200 | 1.26883900  | 3.42989800  |
| H | -1.70293000 | 2.14589000  | -2.00485600 |
| H | -2.19730400 | 1.81648000  | -0.04552600 |
| C | -3.61865200 | 2.24242800  | -1.61153300 |
| O | -4.72222600 | 2.42232100  | -2.08838900 |
| O | -2.55174300 | 2.21356700  | -2.46895300 |
| O | -3.36216700 | 2.03730600  | -0.35518100 |

#### Z-TS4

|   |             |             |             |
|---|-------------|-------------|-------------|
| C | -4.39517800 | -0.48507400 | 0.25360500  |
| C | -3.11126300 | -0.09756500 | 0.62106500  |
| C | -2.71681700 | 1.23550700  | 0.60770500  |
| C | -3.63292900 | 2.19862100  | 0.19795800  |
| C | -4.92562400 | 1.81670100  | -0.17373200 |
| C | -5.31808700 | 0.48051400  | -0.14228800 |
| C | -4.57304300 | -1.97751700 | 0.36209600  |

|   |             |             |             |
|---|-------------|-------------|-------------|
| C | -3.16478100 | -2.54132900 | 0.67707800  |
| C | -2.25616700 | -1.28857100 | 0.97991000  |
| H | -1.71290200 | 1.52722100  | 0.90054700  |
| H | -3.32608100 | 3.23839300  | 0.15140200  |
| H | -5.63250900 | 2.57397100  | -0.49713300 |
| H | -6.32467900 | 0.19547200  | -0.43345400 |
| H | -4.96037700 | -2.43356200 | -0.55519500 |
| H | -3.18105800 | -3.19176000 | 1.55128600  |
| H | -5.27188100 | -2.23645200 | 1.16331800  |
| H | -1.90266100 | -1.27250800 | 2.01170600  |
| N | -1.05169100 | -1.31941900 | 0.13218600  |
| O | -2.66235100 | -3.37113800 | -0.35907500 |
| C | 0.12166000  | -0.68996800 | 0.28816600  |
| C | -1.04122500 | -1.88159900 | -1.11283700 |
| N | 0.80376700  | -0.92073600 | -0.83015100 |
| N | 0.09240700  | -1.66869800 | -1.71910600 |
| C | -2.24229500 | -2.67253100 | -1.51348200 |
| H | -3.02497300 | -2.00484000 | -1.90046600 |
| H | -1.98196900 | -3.40203000 | -2.28010700 |
| C | 2.14058300  | -0.47271300 | -1.13177500 |
| C | 2.25860800  | 0.53236400  | -2.08186000 |
| C | 3.22792300  | -1.02243700 | -0.43935300 |
| C | 3.52177700  | 1.03662100  | -2.36782100 |
| C | 4.47933500  | -0.48467400 | -0.74822500 |
| C | 4.62715800  | 0.52891700  | -1.69349200 |
| H | 3.63451800  | 1.82943200  | -3.09841600 |
| H | 5.35997500  | -0.86204000 | -0.24033900 |
| H | 1.36296600  | 0.94182100  | -2.53583200 |
| H | 5.61689000  | 0.92326800  | -1.90043700 |
| C | 3.05467200  | -2.17001000 | 0.54548500  |
| C | 4.27815900  | -2.40583500 | 1.43062900  |
| C | 2.70761600  | -3.46357600 | -0.20954300 |
| H | 2.21737000  | -1.92763800 | 1.21375300  |
| H | 4.58323100  | -1.49953300 | 1.95994100  |
| H | 4.04565000  | -3.17193900 | 2.17429800  |
| H | 5.12777900  | -2.76670500 | 0.84209700  |
| H | 1.81525700  | -3.35716400 | -0.83112200 |
| H | 3.53915000  | -3.74226000 | -0.86430600 |
| H | 2.54014300  | -4.28020800 | 0.49819400  |
| C | 2.36004400  | 1.83613400  | 1.54012600  |
| C | 1.17738900  | 1.37088000  | 1.10693900  |
| C | 0.55051700  | 0.14648400  | 1.49836400  |
| O | 0.14940900  | -0.26239700 | 2.58251500  |
| C | 2.89610500  | 3.15546500  | 1.04975000  |



|   |              |             |              |
|---|--------------|-------------|--------------|
| H | 3. 15371800  | 3. 81036500 | 1. 88984200  |
| H | 3. 81745600  | 2. 99234300 | 0. 47724200  |
| H | 2. 17821200  | 3. 66783600 | 0. 40546900  |
| C | 3. 28552500  | 1. 07514100 | 2. 45326800  |
| H | 3. 52867600  | 1. 67702900 | 3. 33632700  |
| H | 2. 84677100  | 0. 13270400 | 2. 78978800  |
| H | 4. 23314100  | 0. 86936200 | 1. 93967500  |
| H | -0. 13794100 | 3. 23830200 | 1. 03341200  |
| H | 0. 57092800  | 1. 93150800 | -0. 08655200 |
| C | -0. 73129700 | 3. 35437100 | -0. 79926700 |
| O | -1. 44551900 | 3. 91215000 | -1. 60015600 |
| O | -0. 74402300 | 3. 78184700 | 0. 50194500  |
| O | 0. 06544100  | 2. 34899600 | -1. 04851200 |

**M4**

|   |              |              |              |
|---|--------------|--------------|--------------|
| C | -4. 39517800 | -0. 48507400 | 0. 25360500  |
| C | -3. 11126300 | -0. 09756500 | 0. 62106500  |
| C | -2. 71681700 | 1. 23550700  | 0. 60770500  |
| C | -3. 63292900 | 2. 19862100  | 0. 19795800  |
| C | -4. 92562400 | 1. 81670100  | -0. 17373200 |
| C | -5. 31808700 | 0. 48051400  | -0. 14228800 |
| C | -4. 57304300 | -1. 97751700 | 0. 36209600  |
| C | -3. 16478100 | -2. 54132900 | 0. 67707800  |
| C | -2. 25616700 | -1. 28857100 | 0. 97991000  |
| H | -1. 71290200 | 1. 52722100  | 0. 90054700  |
| H | -3. 32608100 | 3. 23839300  | 0. 15140200  |
| H | -5. 63250900 | 2. 57397100  | -0. 49713300 |
| H | -6. 32467900 | 0. 19547200  | -0. 43345400 |
| H | -4. 96037700 | -2. 43356200 | -0. 55519500 |
| H | -3. 18105800 | -3. 19176000 | 1. 55128600  |
| H | -5. 27188100 | -2. 23645200 | 1. 16331800  |
| H | -1. 90266100 | -1. 27250800 | 2. 01170600  |
| N | -1. 05169100 | -1. 31941900 | 0. 13218600  |
| O | -2. 66235100 | -3. 37113800 | -0. 35907500 |
| C | 0. 12166000  | -0. 68996800 | 0. 28816600  |
| C | -1. 04122500 | -1. 88159900 | -1. 11283700 |
| N | 0. 80376700  | -0. 92073600 | -0. 83015100 |
| N | 0. 09240700  | -1. 66869800 | -1. 71910600 |
| C | -2. 24229500 | -2. 67253100 | -1. 51348200 |
| H | -3. 02497300 | -2. 00484000 | -1. 90046600 |
| H | -1. 98196900 | -3. 40203000 | -2. 28010700 |
| C | 2. 14058300  | -0. 47271300 | -1. 13177500 |
| C | 2. 25860800  | 0. 53236400  | -2. 08186000 |
| C | 3. 22792300  | -1. 02243700 | -0. 43935300 |

|   |              |              |              |
|---|--------------|--------------|--------------|
| C | 3. 52177700  | 1. 03662100  | -2. 36782100 |
| C | 4. 47933500  | -0. 48467400 | -0. 74822500 |
| C | 4. 62715800  | 0. 52891700  | -1. 69349200 |
| H | 3. 63451800  | 1. 82943200  | -3. 09841600 |
| H | 5. 35997500  | -0. 86204000 | -0. 24033900 |
| H | 1. 36296600  | 0. 94182100  | -2. 53583200 |
| H | 5. 61689000  | 0. 92326800  | -1. 90043700 |
| C | 3. 05467200  | -2. 17001000 | 0. 54548500  |
| C | 4. 27815900  | -2. 40583500 | 1. 43062900  |
| C | 2. 70761600  | -3. 46357600 | -0. 20954300 |
| H | 2. 21737000  | -1. 92763800 | 1. 21375300  |
| H | 4. 58323100  | -1. 49953300 | 1. 95994100  |
| H | 4. 04565000  | -3. 17193900 | 2. 17429800  |
| H | 5. 12777900  | -2. 76670500 | 0. 84209700  |
| H | 1. 81525700  | -3. 35716400 | -0. 83112200 |
| H | 3. 53915000  | -3. 74226000 | -0. 86430600 |
| H | 2. 54014300  | -4. 28020800 | 0. 49819400  |
| C | 2. 36004400  | 1. 83613400  | 1. 54012600  |
| C | 1. 17738900  | 1. 37088000  | 1. 10693900  |
| C | 0. 55051700  | 0. 14648400  | 1. 49836400  |
| O | 0. 14940900  | -0. 26239700 | 2. 58251500  |
| C | 2. 89610500  | 3. 15546500  | 1. 04975000  |
| H | 3. 15371800  | 3. 81036500  | 1. 88984200  |
| H | 3. 81745600  | 2. 99234300  | 0. 47724200  |
| H | 2. 17821200  | 3. 66783600  | 0. 40546900  |
| C | 3. 28552500  | 1. 07514100  | 2. 45326800  |
| H | 3. 52867600  | 1. 67702900  | 3. 33632700  |
| H | 2. 84677100  | 0. 13270400  | 2. 78978800  |
| H | 4. 23314100  | 0. 86936200  | 1. 93967500  |
| H | -0. 13794100 | 3. 23830200  | 1. 03341200  |
| H | 0. 57092800  | 1. 93150800  | -0. 08655200 |
| C | -0. 73129700 | 3. 35437100  | -0. 79926700 |
| O | -1. 44551900 | 3. 91215000  | -1. 60015600 |
| O | -0. 74402300 | 3. 78184700  | 0. 50194500  |
| O | 0. 06544100  | 2. 34899600  | -1. 04851200 |

#### Z-M4

|   |              |              |              |
|---|--------------|--------------|--------------|
| C | -4. 39517800 | -0. 48507400 | 0. 25360500  |
| C | -3. 11126300 | -0. 09756500 | 0. 62106500  |
| C | -2. 71681700 | 1. 23550700  | 0. 60770500  |
| C | -3. 63292900 | 2. 19862100  | 0. 19795800  |
| C | -4. 92562400 | 1. 81670100  | -0. 17373200 |
| C | -5. 31808700 | 0. 48051400  | -0. 14228800 |
| C | -4. 57304300 | -1. 97751700 | 0. 36209600  |

|   |             |             |             |
|---|-------------|-------------|-------------|
| C | -3.16478100 | -2.54132900 | 0.67707800  |
| C | -2.25616700 | -1.28857100 | 0.97991000  |
| H | -1.71290200 | 1.52722100  | 0.90054700  |
| H | -3.32608100 | 3.23839300  | 0.15140200  |
| H | -5.63250900 | 2.57397100  | -0.49713300 |
| H | -6.32467900 | 0.19547200  | -0.43345400 |
| H | -4.96037700 | -2.43356200 | -0.55519500 |
| H | -3.18105800 | -3.19176000 | 1.55128600  |
| H | -5.27188100 | -2.23645200 | 1.16331800  |
| H | -1.90266100 | -1.27250800 | 2.01170600  |
| N | -1.05169100 | -1.31941900 | 0.13218600  |
| O | -2.66235100 | -3.37113800 | -0.35907500 |
| C | 0.12166000  | -0.68996800 | 0.28816600  |
| C | -1.04122500 | -1.88159900 | -1.11283700 |
| N | 0.80376700  | -0.92073600 | -0.83015100 |
| N | 0.09240700  | -1.66869800 | -1.71910600 |
| C | -2.24229500 | -2.67253100 | -1.51348200 |
| H | -3.02497300 | -2.00484000 | -1.90046600 |
| H | -1.98196900 | -3.40203000 | -2.28010700 |
| C | 2.14058300  | -0.47271300 | -1.13177500 |
| C | 2.25860800  | 0.53236400  | -2.08186000 |
| C | 3.22792300  | -1.02243700 | -0.43935300 |
| C | 3.52177700  | 1.03662100  | -2.36782100 |
| C | 4.47933500  | -0.48467400 | -0.74822500 |
| C | 4.62715800  | 0.52891700  | -1.69349200 |
| H | 3.63451800  | 1.82943200  | -3.09841600 |
| H | 5.35997500  | -0.86204000 | -0.24033900 |
| H | 1.36296600  | 0.94182100  | -2.53583200 |
| H | 5.61689000  | 0.92326800  | -1.90043700 |
| C | 3.05467200  | -2.17001000 | 0.54548500  |
| C | 4.27815900  | -2.40583500 | 1.43062900  |
| C | 2.70761600  | -3.46357600 | -0.20954300 |
| H | 2.21737000  | -1.92763800 | 1.21375300  |
| H | 4.58323100  | -1.49953300 | 1.95994100  |
| H | 4.04565000  | -3.17193900 | 2.17429800  |
| H | 5.12777900  | -2.76670500 | 0.84209700  |
| H | 1.81525700  | -3.35716400 | -0.83112200 |
| H | 3.53915000  | -3.74226000 | -0.86430600 |
| H | 2.54014300  | -4.28020800 | 0.49819400  |
| C | 2.36004400  | 1.83613400  | 1.54012600  |
| C | 1.17738900  | 1.37088000  | 1.10693900  |
| C | 0.55051700  | 0.14648400  | 1.49836400  |
| O | 0.14940900  | -0.26239700 | 2.58251500  |
| C | 2.89610500  | 3.15546500  | 1.04975000  |

|   |              |             |              |
|---|--------------|-------------|--------------|
| H | 3. 15371800  | 3. 81036500 | 1. 88984200  |
| H | 3. 81745600  | 2. 99234300 | 0. 47724200  |
| H | 2. 17821200  | 3. 66783600 | 0. 40546900  |
| C | 3. 28552500  | 1. 07514100 | 2. 45326800  |
| H | 3. 52867600  | 1. 67702900 | 3. 33632700  |
| H | 2. 84677100  | 0. 13270400 | 2. 78978800  |
| H | 4. 23314100  | 0. 86936200 | 1. 93967500  |
| H | -0. 13794100 | 3. 23830200 | 1. 03341200  |
| H | 0. 57092800  | 1. 93150800 | -0. 08655200 |
| C | -0. 73129700 | 3. 35437100 | -0. 79926700 |
| O | -1. 44551900 | 3. 91215000 | -1. 60015600 |
| O | -0. 74402300 | 3. 78184700 | 0. 50194500  |
| O | 0. 06544100  | 2. 34899600 | -1. 04851200 |

**TS5**

|   |              |              |              |
|---|--------------|--------------|--------------|
| C | -4. 39517800 | -0. 48507400 | 0. 25360500  |
| C | -3. 11126300 | -0. 09756500 | 0. 62106500  |
| C | -2. 71681700 | 1. 23550700  | 0. 60770500  |
| C | -3. 63292900 | 2. 19862100  | 0. 19795800  |
| C | -4. 92562400 | 1. 81670100  | -0. 17373200 |
| C | -5. 31808700 | 0. 48051400  | -0. 14228800 |
| C | -4. 57304300 | -1. 97751700 | 0. 36209600  |
| C | -3. 16478100 | -2. 54132900 | 0. 67707800  |
| C | -2. 25616700 | -1. 28857100 | 0. 97991000  |
| H | -1. 71290200 | 1. 52722100  | 0. 90054700  |
| H | -3. 32608100 | 3. 23839300  | 0. 15140200  |
| H | -5. 63250900 | 2. 57397100  | -0. 49713300 |
| H | -6. 32467900 | 0. 19547200  | -0. 43345400 |
| H | -4. 96037700 | -2. 43356200 | -0. 55519500 |
| H | -3. 18105800 | -3. 19176000 | 1. 55128600  |
| H | -5. 27188100 | -2. 23645200 | 1. 16331800  |
| H | -1. 90266100 | -1. 27250800 | 2. 01170600  |
| N | -1. 05169100 | -1. 31941900 | 0. 13218600  |
| O | -2. 66235100 | -3. 37113800 | -0. 35907500 |
| C | 0. 12166000  | -0. 68996800 | 0. 28816600  |
| C | -1. 04122500 | -1. 88159900 | -1. 11283700 |
| N | 0. 80376700  | -0. 92073600 | -0. 83015100 |
| N | 0. 09240700  | -1. 66869800 | -1. 71910600 |
| C | -2. 24229500 | -2. 67253100 | -1. 51348200 |
| H | -3. 02497300 | -2. 00484000 | -1. 90046600 |
| H | -1. 98196900 | -3. 40203000 | -2. 28010700 |
| C | 2. 14058300  | -0. 47271300 | -1. 13177500 |
| C | 2. 25860800  | 0. 53236400  | -2. 08186000 |
| C | 3. 22792300  | -1. 02243700 | -0. 43935300 |

|   |              |              |              |
|---|--------------|--------------|--------------|
| C | 3. 52177700  | 1. 03662100  | -2. 36782100 |
| C | 4. 47933500  | -0. 48467400 | -0. 74822500 |
| C | 4. 62715800  | 0. 52891700  | -1. 69349200 |
| H | 3. 63451800  | 1. 82943200  | -3. 09841600 |
| H | 5. 35997500  | -0. 86204000 | -0. 24033900 |
| H | 1. 36296600  | 0. 94182100  | -2. 53583200 |
| H | 5. 61689000  | 0. 92326800  | -1. 90043700 |
| C | 3. 05467200  | -2. 17001000 | 0. 54548500  |
| C | 4. 27815900  | -2. 40583500 | 1. 43062900  |
| C | 2. 70761600  | -3. 46357600 | -0. 20954300 |
| H | 2. 21737000  | -1. 92763800 | 1. 21375300  |
| H | 4. 58323100  | -1. 49953300 | 1. 95994100  |
| H | 4. 04565000  | -3. 17193900 | 2. 17429800  |
| H | 5. 12777900  | -2. 76670500 | 0. 84209700  |
| H | 1. 81525700  | -3. 35716400 | -0. 83112200 |
| H | 3. 53915000  | -3. 74226000 | -0. 86430600 |
| H | 2. 54014300  | -4. 28020800 | 0. 49819400  |
| C | 2. 36004400  | 1. 83613400  | 1. 54012600  |
| C | 1. 17738900  | 1. 37088000  | 1. 10693900  |
| C | 0. 55051700  | 0. 14648400  | 1. 49836400  |
| O | 0. 14940900  | -0. 26239700 | 2. 58251500  |
| C | 2. 89610500  | 3. 15546500  | 1. 04975000  |
| H | 3. 15371800  | 3. 81036500  | 1. 88984200  |
| H | 3. 81745600  | 2. 99234300  | 0. 47724200  |
| H | 2. 17821200  | 3. 66783600  | 0. 40546900  |
| C | 3. 28552500  | 1. 07514100  | 2. 45326800  |
| H | 3. 52867600  | 1. 67702900  | 3. 33632700  |
| H | 2. 84677100  | 0. 13270400  | 2. 78978800  |
| H | 4. 23314100  | 0. 86936200  | 1. 93967500  |
| H | -0. 13794100 | 3. 23830200  | 1. 03341200  |
| H | 0. 57092800  | 1. 93150800  | -0. 08655200 |
| C | -0. 73129700 | 3. 35437100  | -0. 79926700 |
| O | -1. 44551900 | 3. 91215000  | -1. 60015600 |
| O | -0. 74402300 | 3. 78184700  | 0. 50194500  |
| O | 0. 06544100  | 2. 34899600  | -1. 04851200 |

### Z-TS5

|   |              |              |              |
|---|--------------|--------------|--------------|
| C | -3. 62115700 | 2. 04015400  | 0. 18096700  |
| C | -2. 61882100 | 1. 10479200  | -0. 06071700 |
| C | -2. 67315400 | -0. 18045600 | 0. 47347000  |
| C | -3. 76071100 | -0. 51769800 | 1. 27532900  |
| C | -4. 76860500 | 0. 41810400  | 1. 52532500  |
| C | -4. 70943500 | 1. 69826200  | 0. 98022600  |
| C | -3. 35526300 | 3. 34353800  | -0. 52586600 |

|   |             |             |             |
|---|-------------|-------------|-------------|
| C | -1.98361700 | 3.16466300  | -1.22201700 |
| C | -1.54118400 | 1.67606800  | -0.95008200 |
| H | -1.90445700 | -0.92736900 | 0.28536500  |
| H | -3.81445300 | -1.52215600 | 1.68142600  |
| H | -5.61333000 | 0.14053100  | 2.14794700  |
| H | -5.49925600 | 2.41864300  | 1.17256400  |
| H | -3.32288400 | 4.20046200  | 0.15614000  |
| H | -2.06732500 | 3.30950600  | -2.29895800 |
| H | -4.13039900 | 3.56318000  | -1.26575600 |
| H | -1.40508800 | 1.11095600  | -1.87223300 |
| N | -0.22980000 | 1.65220500  | -0.27158800 |
| O | -1.02785700 | 4.13422900  | -0.81959900 |
| C | 0.64820200  | 0.64402000  | -0.15650100 |
| C | 0.23908300  | 2.68391700  | 0.48876100  |
| N | 1.61833000  | 1.10586400  | 0.63174100  |
| N | 1.37847700  | 2.38468200  | 1.04456800  |
| C | -0.54597100 | 3.95323800  | 0.49440600  |
| H | -1.36118700 | 3.89334900  | 1.22921000  |
| H | 0.09723700  | 4.79680400  | 0.74420000  |
| C | 2.82305000  | 0.43192400  | 1.04341300  |
| C | 2.94531400  | 0.15520100  | 2.39936900  |
| C | 3.79702100  | 0.09594800  | 0.09508400  |
| C | 4.08237000  | -0.49975100 | 2.85562900  |
| C | 4.92227100  | -0.56895300 | 0.58913100  |
| C | 5.06580700  | -0.86528400 | 1.94230300  |
| H | 4.19220500  | -0.72701900 | 3.90984900  |
| H | 5.70718400  | -0.86260800 | -0.09839200 |
| H | 2.14815500  | 0.44774000  | 3.07488200  |
| H | 5.95543600  | -1.38502000 | 2.28247000  |
| C | 3.67371000  | 0.50336400  | -1.36532800 |
| C | 4.57024300  | -0.31111700 | -2.29702400 |
| C | 3.97207700  | 2.00443300  | -1.50301400 |
| H | 2.64380500  | 0.33102300  | -1.69551500 |
| H | 4.34463400  | -0.05341300 | -3.33443400 |
| H | 5.62921300  | -0.09261600 | -2.12715300 |
| H | 4.40918900  | -1.38496200 | -2.16946400 |
| H | 3.31261800  | 2.61032200  | -0.87463900 |
| H | 5.00425800  | 2.21053200  | -1.20252900 |
| H | 3.84596100  | 2.32205600  | -2.54166000 |
| C | 0.61999800  | -3.14201800 | -0.47844500 |
| C | 0.81372600  | -1.82090300 | -0.07144900 |
| C | 0.49972900  | -0.69995100 | -0.86193000 |
| O | 0.07641600  | -0.60802700 | -2.02076600 |
| C | 0.07595100  | -3.53912800 | -1.72808600 |

|   |             |             |             |
|---|-------------|-------------|-------------|
| H | 0.27173800  | -4.57601800 | -2.00093100 |
| H | -1.19938100 | -3.54949200 | -1.46184400 |
| H | 0.14717000  | -2.82759600 | -2.54471500 |
| C | 0.85668300  | -4.20793000 | 0.55312200  |
| H | 1.20707500  | -5.13654900 | 0.09812300  |
| H | 1.56580200  | -3.88341300 | 1.31771400  |
| H | -0.11162700 | -4.39271700 | 1.03300100  |
| H | 1.14447700  | -1.63693600 | 0.94490000  |
| H | -4.62748000 | -3.70396600 | -0.73009300 |
| C | -2.87089000 | -3.47169600 | -0.09317100 |
| O | -2.14833900 | -3.25687400 | 0.87810800  |
| O | -2.53932600 | -3.62771100 | -1.31842800 |
| O | -4.22050700 | -3.54773600 | 0.13194400  |

**M05**

|   |             |             |             |
|---|-------------|-------------|-------------|
| C | -3.70893900 | -0.63720000 | 0.12238600  |
| C | -2.67427000 | -1.47503400 | -0.30252900 |
| C | -2.36147100 | -2.64877000 | 0.37692200  |
| C | -3.08776100 | -2.95278900 | 1.52757500  |
| C | -4.10591800 | -2.10754100 | 1.97167800  |
| C | -4.43192300 | -0.94845400 | 1.26808000  |
| C | -3.87896400 | 0.53010700  | -0.81695400 |
| C | -3.12571900 | 0.04818400  | -2.07610200 |
| C | -2.03155100 | -0.90965900 | -1.54519300 |
| H | -1.56944600 | -3.29464600 | 0.01140900  |
| H | -2.85965500 | -3.85713600 | 2.08154500  |
| H | -4.66037700 | -2.36269700 | 2.86919300  |
| H | -5.24171000 | -0.30808900 | 1.60471700  |
| H | -3.39920400 | 1.42016300  | -0.39428900 |
| H | -3.80331900 | -0.55087600 | -2.68850300 |
| H | -4.92087700 | 0.77682300  | -1.03180300 |
| H | -1.69431900 | -1.65954000 | -2.26151900 |
| N | -0.85223000 | -0.07978900 | -1.21466800 |
| O | -2.63699100 | 1.05197900  | -2.94181300 |
| C | 0.23890800  | -0.45324100 | -0.52129000 |
| C | -0.66437600 | 1.21529100  | -1.60802000 |
| N | 1.04377300  | 0.61080600  | -0.54173200 |
| N | 0.48829000  | 1.66783100  | -1.20693500 |
| C | -1.72673500 | 1.95660000  | -2.35794500 |
| H | -2.22189300 | 2.66301800  | -1.67753200 |
| H | -1.27337300 | 2.53011100  | -3.16779300 |
| C | 2.36326200  | 0.73058400  | 0.02021900  |
| C | 2.51665300  | 1.64964000  | 1.05469300  |
| C | 3.41897000  | -0.03054500 | -0.49032100 |

|   |              |              |              |
|---|--------------|--------------|--------------|
| C | 3. 77117200  | 1. 82256600  | 1. 62426300  |
| C | 4. 66600900  | 0. 16301700  | 0. 11623100  |
| C | 4. 84535200  | 1. 06920800  | 1. 15572200  |
| H | 3. 90577900  | 2. 53869200  | 2. 42723400  |
| H | 5. 51745500  | -0. 40451000 | -0. 24828300 |
| H | 1. 65756000  | 2. 22335300  | 1. 38901900  |
| H | 5. 82939800  | 1. 19249000  | 1. 59658300  |
| C | 3. 28821300  | -0. 97671600 | -1. 67046000 |
| C | 3. 78432200  | -2. 38375800 | -1. 32522600 |
| C | 4. 03368000  | -0. 40524500 | -2. 88326500 |
| H | 2. 23426500  | -1. 07643400 | -1. 94151200 |
| H | 3. 57654800  | -3. 06335400 | -2. 15569000 |
| H | 4. 86421900  | -2. 39137100 | -1. 14383000 |
| H | 3. 27550200  | -2. 76239800 | -0. 43581700 |
| H | 3. 64882200  | 0. 58154400  | -3. 15570800 |
| H | 5. 10342800  | -0. 30477400 | -2. 67207700 |
| H | 3. 91981400  | -1. 07156000 | -3. 74318700 |
| C | 1. 01744400  | -1. 23008100 | 2. 21761700  |
| C | 1. 04905900  | -2. 15506500 | 1. 09665100  |
| C | 0. 56310100  | -1. 89439700 | -0. 16205200 |
| O | 0. 40477800  | -2. 64520400 | -1. 16667800 |
| C | -0. 07366200 | -0. 49023300 | 2. 52009500  |
| H | -0. 06454800 | 0. 20454800  | 3. 35753300  |
| H | -0. 80211600 | 1. 23229200  | 1. 54992200  |
| H | -1. 02882100 | -0. 69570100 | 2. 03922200  |
| C | 2. 26540800  | -1. 16283500 | 3. 06155900  |
| H | 2. 47526500  | -2. 15088000 | 3. 48695200  |
| H | 3. 12704400  | -0. 88685000 | 2. 44417100  |
| H | 2. 16796100  | -0. 44731000 | 3. 88135200  |
| H | 1. 50452400  | -3. 13197800 | 1. 24231000  |
| H | -3. 04954200 | 3. 29060300  | 0. 76439200  |
| C | -1. 21700600 | 3. 06233900  | 1. 20441900  |
| O | -0. 14923200 | 3. 51521000  | 1. 51074500  |
| O | -1. 54938800 | 1. 76405900  | 1. 20402100  |
| O | -2. 24126400 | 3. 82129200  | 0. 79907700  |

### Z-M05

|   |              |              |              |
|---|--------------|--------------|--------------|
| C | -4. 07564600 | 1. 44017100  | 0. 18850400  |
| C | -2. 93489200 | 0. 64562200  | 0. 12133500  |
| C | -2. 78873200 | -0. 49792700 | 0. 89965200  |
| C | -3. 82306300 | -0. 83525900 | 1. 76858600  |
| C | -4. 96975900 | -0. 04017800 | 1. 85042800  |
| C | -5. 10600200 | 1. 09938200  | 1. 06108800  |
| C | -4. 00848300 | 2. 59362900  | -0. 77828400 |



|   |             |             |             |
|---|-------------|-------------|-------------|
| C | -2.61504700 | 2.49214400  | -1.44911500 |
| C | -1.95581700 | 1.17002200  | -0.89857600 |
| H | -1.90866400 | -1.13302400 | 0.83072800  |
| H | -3.73655700 | -1.73235800 | 2.37293600  |
| H | -5.76810200 | -0.31854800 | 2.53129900  |
| H | -6.00292900 | 1.70893600  | 1.12140500  |
| H | -4.12036200 | 3.56806100  | -0.28997000 |
| H | -2.70620000 | 2.40985600  | -2.53212400 |
| H | -4.79915200 | 2.52880300  | -1.53155600 |
| H | -1.75370200 | 0.44594400  | -1.68710900 |
| N | -0.64578400 | 1.45923500  | -0.28649800 |
| O | -1.82933200 | 3.65835100  | -1.25812600 |
| C | 0.39722800  | 0.63952200  | -0.03644900 |
| C | -0.33643600 | 2.68242800  | 0.23629500  |
| N | 1.30228500  | 1.41508600  | 0.57844900  |
| N | 0.85164400  | 2.69249700  | 0.76152000  |
| C | -1.32067700 | 3.78786700  | 0.05230100  |
| H | -2.11581100 | 3.72303000  | 0.80876600  |
| H | -0.82573400 | 4.75513800  | 0.13681700  |
| C | 2.65535900  | 1.10218600  | 0.95139500  |
| C | 2.96277200  | 1.17458900  | 2.30703100  |
| C | 3.60234800  | 0.78725800  | -0.02793700 |
| C | 4.25910300  | 0.90995000  | 2.72621200  |
| C | 4.89633100  | 0.51932600  | 0.43111500  |
| C | 5.22555400  | 0.57559400  | 1.78041300  |
| H | 4.50974300  | 0.95989800  | 3.77985200  |
| H | 5.66554100  | 0.26819600  | -0.29350300 |
| H | 2.18066200  | 1.43380300  | 3.01290600  |
| H | 6.24163800  | 0.36060500  | 2.09441000  |
| C | 3.30634800  | 0.75777100  | -1.51659000 |
| C | 3.66939700  | -0.59667100 | -2.13418700 |
| C | 4.03857500  | 1.90695600  | -2.22158100 |
| H | 2.23389100  | 0.90757900  | -1.67290000 |
| H | 3.35894800  | -0.62097700 | -3.18253500 |
| H | 4.75081300  | -0.76505800 | -2.10324000 |
| H | 3.17536200  | -1.41626600 | -1.60599800 |
| H | 3.74940300  | 2.87549400  | -1.80432200 |
| H | 5.12297100  | 1.80126300  | -2.11457300 |
| H | 3.80282600  | 1.90448100  | -3.28948400 |
| C | 1.44674500  | -3.03824300 | 0.11108100  |
| C | 1.20985900  | -1.61508500 | 0.36171900  |
| C | 0.48288700  | -0.78867700 | -0.43993700 |
| O | -0.19760800 | -1.05851500 | -1.51506700 |
| C | 1.43880300  | -3.57694100 | -1.11821200 |

|   |              |              |              |
|---|--------------|--------------|--------------|
| H | 1. 63242300  | -4. 63641400 | -1. 25778900 |
| H | -0. 96871200 | -2. 22570600 | -1. 45210600 |
| H | 1. 22334900  | -2. 97866500 | -1. 99602400 |
| C | 1. 70818800  | -3. 87003700 | 1. 33951300  |
| H | 1. 97487900  | -4. 89626700 | 1. 07764500  |
| H | 2. 51823400  | -3. 44148400 | 1. 94037300  |
| H | 0. 80558900  | -3. 89052200 | 1. 95841500  |
| H | 1. 62428200  | -1. 20579500 | 1. 27855000  |
| H | -2. 63668500 | -4. 96484200 | -1. 49231700 |
| C | -1. 82108600 | -3. 67464000 | -0. 39055800 |
| O | -1. 50176600 | -3. 30143700 | 0. 71922500  |
| O | -1. 60907600 | -3. 07430800 | -1. 53358700 |
| O | -2. 49323000 | -4. 83627100 | -0. 54548300 |

**M5**

|   |              |              |              |
|---|--------------|--------------|--------------|
| C | 4. 27776600  | -0. 22557600 | 0. 52643500  |
| C | 3. 15132500  | 0. 44113900  | 0. 05437500  |
| C | 3. 02839400  | 1. 82600800  | 0. 12226100  |
| C | 4. 08083500  | 2. 54394100  | 0. 68522500  |
| C | 5. 21862100  | 1. 88614800  | 1. 16058400  |
| C | 5. 32718500  | 0. 49928500  | 1. 08481900  |
| C | 4. 15751700  | -1. 71504400 | 0. 32487100  |
| C | 2. 69235100  | -1. 95266500 | -0. 11259800 |
| C | 2. 14087800  | -0. 53246200 | -0. 50801800 |
| H | 2. 12970700  | 2. 32045900  | -0. 24758400 |
| H | 4. 01644300  | 3. 62478800  | 0. 75589600  |
| H | 6. 02744300  | 2. 46302800  | 1. 59807000  |
| H | 6. 21208000  | -0. 00633800 | 1. 46004300  |
| H | 4. 37338000  | -2. 29570900 | 1. 22728400  |
| H | 2. 62743200  | -2. 62638200 | -0. 96744900 |
| H | 4. 84632200  | -2. 06177400 | -0. 45239700 |
| H | 2. 01579300  | -0. 42829500 | -1. 58949900 |
| N | 0. 82304400  | -0. 32065800 | 0. 08328800  |
| O | 1. 92622600  | -2. 59965900 | 0. 89477500  |
| C | -0. 21198100 | 0. 40642500  | -0. 36614500 |
| C | 0. 48456200  | -0. 82238000 | 1. 30743400  |
| N | -1. 12641100 | 0. 32762300  | 0. 60165600  |
| N | -0. 71040300 | -0. 44782300 | 1. 65356900  |
| C | 1. 46261900  | -1. 75932300 | 1. 93590500  |
| H | 2. 28281400  | -1. 20408000 | 2. 41188000  |
| H | 0. 97180600  | -2. 38499700 | 2. 68095500  |
| C | -2. 44032200 | 0. 90864500  | 0. 59138500  |
| C | -2. 52543600 | 2. 29311400  | 0. 46696500  |
| C | -3. 56286200 | 0. 07845100  | 0. 69505300  |

|   |             |             |             |
|---|-------------|-------------|-------------|
| C | -3.77863000 | 2.89126600  | 0.47114100  |
| C | -4.80505400 | 0.72008700  | 0.71675800  |
| C | -4.91713300 | 2.10204900  | 0.61097300  |
| H | -3.86223900 | 3.96757900  | 0.36906300  |
| H | -5.70556200 | 0.12000500  | 0.80638800  |
| H | -1.61165500 | 2.86282700  | 0.33083100  |
| H | -5.89964800 | 2.56280700  | 0.62625800  |
| C | -3.47367600 | -1.43560900 | 0.78386100  |
| C | -4.44542700 | -2.12239200 | -0.18166000 |
| C | -3.70682200 | -1.90137200 | 2.22576200  |
| H | -2.46177400 | -1.73564800 | 0.49355400  |
| H | -4.27280800 | -3.20227100 | -0.17179400 |
| H | -5.48738100 | -1.95437500 | 0.10707900  |
| H | -4.31249700 | -1.76160500 | -1.20541000 |
| H | -4.70831900 | -1.61314900 | 2.56271300  |
| H | -3.62694200 | -2.99063000 | 2.29201700  |
| H | -2.97273400 | -1.45450300 | 2.90000800  |
| C | -0.45003400 | -0.64789000 | -3.07120300 |
| C | -0.16711400 | 0.76065400  | -2.80804400 |
| C | -0.14487300 | 1.34522900  | -1.56672000 |
| O | 0.06706600  | 2.53759400  | -1.19868900 |
| C | 0.34974900  | -1.27855700 | -4.18804800 |
| H | 0.19500900  | -0.72249100 | -5.11933400 |
| H | 1.42475700  | -1.24043400 | -3.97818500 |
| H | 0.05987400  | -2.31777800 | -4.35898200 |
| C | -1.35758300 | -1.37461700 | -2.39127700 |
| H | -2.03315900 | -0.90938100 | -1.67917500 |
| H | -1.47872600 | -2.43971100 | -2.56517900 |
| H | 0.09151600  | 1.40327600  | -3.64587800 |

### Z-M5

|   |            |             |             |
|---|------------|-------------|-------------|
| C | 4.40434300 | 0.06794100  | 0.01803200  |
| C | 3.10574100 | 0.56162900  | -0.06408700 |
| C | 2.71554500 | 1.70938000  | 0.62008800  |
| C | 3.66161800 | 2.36058200  | 1.40699300  |
| C | 4.96714000 | 1.87020400  | 1.49736600  |
| C | 5.34840700 | 0.72432800  | 0.80364500  |
| C | 4.57541600 | -1.16799000 | -0.82769100 |
| C | 3.15071400 | -1.54190300 | -1.30552800 |
| C | 2.24671700 | -0.30139100 | -0.95854900 |
| H | 1.69661400 | 2.08355000  | 0.54207300  |
| H | 3.38477900 | 3.25684400  | 1.95207700  |
| H | 5.69259000 | 2.38949500  | 2.11546300  |
| H | 6.36408500 | 0.34716400  | 0.87785600  |

|   |             |             |             |
|---|-------------|-------------|-------------|
| H | 5.01764800  | -2.00863800 | -0.28289800 |
| H | 3.12191300  | -1.72620800 | -2.37923400 |
| H | 5.22385200  | -0.96757000 | -1.68652100 |
| H | 1.88898700  | 0.22582200  | -1.84662400 |
| N | 1.04126700  | -0.73992400 | -0.24970700 |
| O | 2.69446000  | -2.76259000 | -0.73652400 |
| C | -0.15611300 | -0.13437700 | -0.15378700 |
| C | 1.03357800  | -1.81570600 | 0.58898300  |
| N | -0.85079800 | -0.89307100 | 0.70170900  |
| N | -0.11615400 | -1.94782900 | 1.18146700  |
| C | 2.26116800  | -2.66497800 | 0.60550800  |
| H | 3.02929500  | -2.21914300 | 1.25400600  |
| H | 2.02959900  | -3.66820400 | 0.96283200  |
| C | -2.22175700 | -0.73871400 | 1.10757500  |
| C | -2.44977500 | -0.47642000 | 2.45218800  |
| C | -3.25105700 | -0.87139700 | 0.16511700  |
| C | -3.75531600 | -0.31906900 | 2.90278800  |
| C | -4.54878000 | -0.69519400 | 0.65083900  |
| C | -4.80200200 | -0.42164700 | 1.99341000  |
| H | -3.94832600 | -0.11102300 | 3.94923600  |
| H | -5.38436300 | -0.77415200 | -0.03522100 |
| H | -1.60325700 | -0.39309100 | 3.12593200  |
| H | -5.82603000 | -0.29155300 | 2.32791900  |
| C | -2.97092100 | -1.25297900 | -1.28033600 |
| C | -4.13253800 | -0.94106500 | -2.22252500 |
| C | -2.60340500 | -2.74347800 | -1.35301600 |
| H | -2.11567000 | -0.67166700 | -1.63958000 |
| H | -3.82473800 | -1.13563700 | -3.25270200 |
| H | -5.00279800 | -1.57222100 | -2.01426300 |
| H | -4.43367000 | 0.10753100  | -2.15056400 |
| H | -1.74767800 | -2.98392700 | -0.71479200 |
| H | -3.44918000 | -3.35702800 | -1.02585700 |
| H | -2.35436000 | -3.02134400 | -2.38096000 |
| C | -1.74438900 | 3.28625900  | -0.78205500 |
| C | -1.25898600 | 2.02477200  | -0.24205900 |
| C | -0.54324400 | 1.08722900  | -0.95152500 |
| O | -0.12438900 | 1.05485400  | -2.14657600 |
| C | -1.54732200 | 3.69575300  | -2.04886400 |
| H | -1.94394900 | 4.65087400  | -2.38165300 |
| H | -0.99700500 | 3.08474800  | -2.75203400 |
| C | -2.52250800 | 4.13721800  | 0.19473700  |
| H | -2.86595300 | 5.06570900  | -0.26672200 |
| H | -3.39689600 | 3.59256700  | 0.56943300  |
| H | -1.90958800 | 4.39174800  | 1.06689500  |

|               |             |             |             |
|---------------|-------------|-------------|-------------|
| H             | -1.50030000 | 1.79907700  | 0.79291700  |
| <b>TS6(R)</b> |             |             |             |
| C             | 3.78316800  | -2.16915200 | -0.11533200 |
| C             | 2.83372700  | -1.49879300 | 0.65143200  |
| C             | 2.94040900  | -1.42147900 | 2.03594300  |
| C             | 4.02816100  | -2.03975100 | 2.64925200  |
| C             | 4.98872200  | -2.70875500 | 1.88698400  |
| C             | 4.87431700  | -2.77605600 | 0.49967600  |
| C             | 3.46944500  | -2.06646200 | -1.58578100 |
| C             | 2.03622500  | -1.49380200 | -1.64988600 |
| C             | 1.79474800  | -0.85277000 | -0.23855500 |
| H             | 2.20350200  | -0.86102600 | 2.60214900  |
| H             | 4.13585500  | -1.99336400 | 3.72830600  |
| H             | 5.83181100  | -3.18234300 | 2.38042900  |
| H             | 5.62335300  | -3.29626200 | -0.09065200 |
| H             | 3.50887300  | -3.02506600 | -2.11182400 |
| H             | 1.91955800  | -0.72810100 | -2.41840600 |
| H             | 4.17347200  | -1.38688000 | -2.07731700 |
| H             | 1.90083000  | 0.23121100  | -0.28325100 |
| N             | 0.43022700  | -1.11468900 | 0.21024500  |
| O             | 1.10149000  | -2.50764900 | -2.00700900 |
| C             | -0.46123300 | -0.33579500 | 0.84032700  |
| C             | -0.18148700 | -2.29497400 | -0.07388500 |
| N             | -1.55646200 | -1.09810100 | 0.96475400  |
| N             | -1.39928800 | -2.32429500 | 0.38220000  |
| C             | 0.56538400  | -3.25610400 | -0.93705400 |
| H             | 1.34614900  | -3.76926900 | -0.35829800 |
| H             | -0.11927800 | -3.99499600 | -1.35317000 |
| C             | -2.73580000 | -0.83078600 | 1.74044600  |
| C             | -2.54847200 | -0.49258900 | 3.07912600  |
| C             | -4.00282100 | -0.94614700 | 1.15910600  |
| C             | -3.65152500 | -0.24853400 | 3.88295300  |
| C             | -5.09340600 | -0.70936400 | 2.00399300  |
| C             | -4.92887300 | -0.36236300 | 3.33924100  |
| H             | -3.51342300 | 0.01781800  | 4.92470100  |
| H             | -6.09716100 | -0.79847900 | 1.60145300  |
| H             | -1.54070400 | -0.42706400 | 3.47700500  |
| H             | -5.80132200 | -0.18238000 | 3.95890900  |
| C             | -4.22412100 | -1.34300800 | -0.29074800 |
| C             | -5.29697400 | -0.48053700 | -0.96237300 |
| C             | -4.58995400 | -2.82985900 | -0.38697500 |
| H             | -3.28268400 | -1.19586300 | -0.83360400 |
| H             | -5.37247200 | -0.74096100 | -2.02147800 |

|   |             |             |             |
|---|-------------|-------------|-------------|
| H | -6.28301000 | -0.64746900 | -0.51892100 |
| H | -5.06012100 | 0.58385400  | -0.88071200 |
| H | -3.81119000 | -3.45250600 | 0.05752700  |
| H | -5.53419000 | -3.02457800 | 0.13288100  |
| H | -4.71363500 | -3.11896700 | -1.43542700 |
| C | -2.11642000 | 2.44220400  | 0.79498700  |
| C | -1.07904900 | 2.04658200  | 1.62625000  |
| C | -0.12890300 | 0.99493600  | 1.47484000  |
| O | 1.00254800  | 1.00853500  | 1.99859800  |
| C | -2.80923300 | 3.75099300  | 1.10314100  |
| H | -2.92480500 | 4.34958800  | 0.19321400  |
| H | -3.81462700 | 3.56600900  | 1.49588100  |
| H | -2.26040500 | 4.34001300  | 1.84125000  |
| C | -2.46061900 | 1.79729900  | -0.41202000 |
| H | -2.40492800 | 0.71721100  | -0.46316200 |
| H | -3.28793900 | 2.21805800  | -0.98196500 |
| H | -0.75473400 | 2.74971400  | 2.39066500  |
| C | -0.78990100 | 2.01933400  | -1.58023000 |
| N | 0.33402900  | 1.90690400  | -0.87505800 |
| N | 0.73648500  | 3.14949700  | -0.39027500 |
| O | 1.99425100  | 4.18494000  | 1.17166700  |
| C | 3.03730700  | 2.40208000  | -0.01711600 |
| C | 3.34295700  | 2.10242700  | -1.34638500 |
| C | 4.45867500  | 1.32272200  | -1.63955300 |
| C | 5.25614600  | 0.82771800  | -0.60762100 |
| C | 4.94698800  | 1.12459200  | 0.71845800  |
| C | 3.84587900  | 1.92235900  | 1.01264000  |
| H | 2.70121900  | 2.47349500  | -2.13928300 |
| H | 4.70593700  | 1.10027700  | -2.67376200 |
| H | 5.55194500  | 0.71532000  | 1.52153700  |
| H | 3.57287300  | 2.15596900  | 2.03620600  |
| C | -1.10115200 | 0.84824200  | -2.44931900 |
| O | -0.87683700 | -0.31212100 | -2.17346100 |
| O | -1.69450700 | 1.24058700  | -3.58365300 |
| C | -2.06387200 | 0.19468900  | -4.49973900 |
| C | -3.36159200 | -0.46267800 | -4.07350300 |
| H | -1.24976500 | -0.53171600 | -4.55106400 |
| H | -2.16538800 | 0.69730700  | -5.46255800 |
| H | -3.67932300 | -1.18939300 | -4.82559200 |
| H | -3.22440700 | -0.98419600 | -3.12316000 |
| H | -4.14788800 | 0.28801800  | -3.95984300 |
| H | -1.06922000 | 2.98397600  | -2.00720800 |
| H | -0.00260900 | 3.76938100  | -0.06118900 |
| C | 1.88916000  | 3.29409000  | 0.33973600  |

|               |             |             |             |
|---------------|-------------|-------------|-------------|
| H             | 6.11329000  | 0.20107200  | -0.83719500 |
| <b>TS6(S)</b> |             |             |             |
| C             | -5.83248900 | 0.47663900  | 0.23095500  |
| C             | -4.68515400 | -0.03210100 | -0.37005900 |
| C             | -4.70205600 | -1.21572200 | -1.10200900 |
| C             | -5.91204500 | -1.89280000 | -1.22718300 |
| C             | -7.07095000 | -1.38737000 | -0.63200700 |
| C             | -7.04116500 | -0.20255800 | 0.09961200  |
| C             | -5.54403200 | 1.76401900  | 0.96167600  |
| C             | -4.00200300 | 1.90609600  | 0.95450200  |
| C             | -3.49482700 | 0.85886900  | -0.10451800 |
| H             | -3.79412600 | -1.61214300 | -1.55230700 |
| H             | -5.95466500 | -2.81932100 | -1.78960700 |
| H             | -8.00597500 | -1.92807300 | -0.73744000 |
| H             | -7.94454600 | 0.18059900  | 0.56459900  |
| H             | -5.91191400 | 1.76874900  | 1.99261700  |
| H             | -3.68767700 | 2.90690300  | 0.65755000  |
| H             | -6.00614700 | 2.61580000  | 0.45263900  |
| H             | -3.13488300 | 1.35540500  | -1.00624700 |
| N             | -2.38191100 | 0.07776300  | 0.44277000  |
| O             | -3.43178100 | 1.73327800  | 2.24166900  |
| C             | -1.38177600 | -0.58017800 | -0.17510800 |
| C             | -2.35119500 | -0.27406700 | 1.76169000  |
| N             | -0.80083400 | -1.31136900 | 0.78262700  |
| N             | -1.39236000 | -1.11623100 | 1.99660300  |
| C             | -3.33274200 | 0.38938800  | 2.67035100  |
| H             | -4.30324300 | -0.12582600 | 2.63460600  |
| H             | -2.96274500 | 0.38649900  | 3.69533700  |
| C             | 0.33062400  | -2.20942800 | 0.71020300  |
| C             | 0.19135700  | -3.37077300 | -0.04335000 |
| C             | 1.47950200  | -1.91963200 | 1.45836900  |
| C             | 1.23979100  | -4.28083900 | -0.08860900 |
| C             | 2.50253700  | -2.86929000 | 1.40294700  |
| C             | 2.39561300  | -4.02795300 | 0.64055100  |
| H             | 1.14854100  | -5.17885700 | -0.68895700 |
| H             | 3.41541700  | -2.68317900 | 1.96015400  |
| H             | -0.72002000 | -3.53408600 | -0.60123600 |
| H             | 3.22091900  | -4.73305500 | 0.61447700  |
| C             | 1.61980800  | -0.68747000 | 2.33092600  |
| C             | 2.99748600  | -0.03330400 | 2.20829100  |
| C             | 1.33397100  | -1.04914200 | 3.79577300  |
| H             | 0.89488500  | 0.05599100  | 1.99057000  |
| H             | 3.00440500  | 0.88781200  | 2.79852400  |

|   |             |             |             |
|---|-------------|-------------|-------------|
| H | 3.79627100  | -0.67883200 | 2.58917900  |
| H | 3.21727000  | 0.21892100  | 1.16856700  |
| H | 2.07833900  | -1.76526600 | 4.16199300  |
| H | 1.39094600  | -0.15344500 | 4.42232000  |
| H | 0.34376600  | -1.49457500 | 3.91203900  |
| C | -1.04795900 | 1.78041600  | -2.36057300 |
| C | -1.30524400 | 0.42966400  | -2.55556700 |
| C | -1.19576400 | -0.67977700 | -1.67363000 |
| O | -1.08510300 | -1.84807800 | -2.08874600 |
| C | -1.09138300 | 2.68780200  | -3.56823600 |
| H | -1.33409900 | 2.14005700  | -4.47997600 |
| H | -1.83358000 | 3.48014800  | -3.43055000 |
| H | -0.12109500 | 3.17659800  | -3.70659600 |
| C | -0.56481600 | 2.33217600  | -1.16460300 |
| H | -0.78862200 | 1.88775000  | -0.20160200 |
| H | -0.44504900 | 3.41426000  | -1.12971000 |
| H | -1.44932200 | 0.08940200  | -3.57745100 |
| C | 1.30678500  | 1.53211200  | -1.13949400 |
| N | 1.28240800  | 0.22591100  | -0.88921800 |
| N | 1.68765300  | -0.56250900 | -2.00831600 |
| O | 2.96017600  | -2.36232300 | -2.52171300 |
| C | 4.03045600  | -0.70355100 | -1.21352800 |
| C | 4.86183900  | -1.59521800 | -0.53387500 |
| C | 5.96852800  | -1.13042900 | 0.16815800  |
| C | 6.27539900  | 0.22887400  | 0.16224700  |
| C | 5.48086300  | 1.11539000  | -0.56131800 |
| C | 4.35837200  | 0.65359100  | -1.24220200 |
| H | 4.61492200  | -2.65110900 | -0.56231400 |
| H | 6.59771000  | -1.82769800 | 0.71275300  |
| H | 5.73880700  | 2.16854200  | -0.60423200 |
| H | 3.75405600  | 1.34899100  | -1.81281700 |
| C | 1.64840900  | 2.42064700  | 0.02300900  |
| O | 1.28470600  | 2.26898900  | 1.16607700  |
| O | 2.39903300  | 3.45743900  | -0.39023800 |
| C | 2.74334500  | 4.41850100  | 0.62356600  |
| C | 3.94549500  | 3.95922700  | 1.42502300  |
| H | 1.87529900  | 4.57020200  | 1.26926700  |
| H | 2.95286200  | 5.33832500  | 0.07483200  |
| H | 4.16783300  | 4.68583400  | 2.21082200  |
| H | 3.74147800  | 2.99189000  | 1.88944000  |
| H | 4.82412700  | 3.86471200  | 0.78391300  |
| H | 1.67691900  | 1.89498600  | -2.10072500 |
| H | 0.95016000  | -1.17144500 | -2.37019600 |
| C | 2.85703900  | -1.28753000 | -1.94479100 |



|              |             |             |             |
|--------------|-------------|-------------|-------------|
| H            | 7.14208000  | 0.59346600  | 0.70496600  |
| <b>M6(R)</b> |             |             |             |
| C            | 3.55013700  | 2.27515300  | 0.61730200  |
| C            | 2.51585800  | 1.83623700  | -0.20497400 |
| C            | 2.31025900  | 2.37710900  | -1.47167900 |
| C            | 3.16703400  | 3.38993200  | -1.89712300 |
| C            | 4.20758000  | 3.83750300  | -1.07888800 |
| C            | 4.40867000  | 3.28146800  | 0.18235700  |
| C            | 3.59159600  | 1.50742500  | 1.91198500  |
| C            | 2.30783200  | 0.64861200  | 1.91485100  |
| C            | 1.75465100  | 0.70078500  | 0.44582800  |
| H            | 1.51666700  | 1.97553700  | -2.09670400 |
| H            | 3.03209800  | 3.82962700  | -2.88033200 |
| H            | 4.86743700  | 4.62472500  | -1.43042700 |
| H            | 5.22037600  | 3.62766900  | 0.81581900  |
| H            | 3.61195200  | 2.14820800  | 2.79979200  |
| H            | 2.51025500  | -0.38828500 | 2.18734300  |
| H            | 4.47579100  | 0.86419000  | 1.95256700  |
| H            | 1.90087700  | -0.24277200 | -0.07819100 |
| N            | 0.30859700  | 0.95002300  | 0.47108700  |
| O            | 1.37505500  | 1.10027900  | 2.89254600  |
| C            | -0.67346600 | 0.55213800  | -0.35884400 |
| C            | -0.23651800 | 1.80979400  | 1.37796200  |
| N            | -1.75414200 | 1.22843500  | 0.05018700  |
| N            | -1.49787100 | 2.01014400  | 1.14638300  |
| C            | 0.63552000  | 2.24491300  | 2.50821200  |
| H            | 1.29238200  | 3.07196300  | 2.20510200  |
| H            | 0.02799900  | 2.55819800  | 3.35678200  |
| C            | -3.03172100 | 1.36096900  | -0.59651400 |
| C            | -3.02500200 | 1.85166500  | -1.89999700 |
| C            | -4.20750600 | 1.04839000  | 0.09083500  |
| C            | -4.22647100 | 2.01776000  | -2.57239900 |
| C            | -5.40346800 | 1.24217500  | -0.61201000 |
| C            | -5.41976500 | 1.71180800  | -1.91994900 |
| H            | -4.23121200 | 2.38765400  | -3.59156300 |
| H            | -6.34377700 | 1.01779900  | -0.11750900 |
| H            | -2.07325800 | 2.07450000  | -2.37451200 |
| H            | -6.36791100 | 1.84380600  | -2.43094200 |
| C            | -4.21968500 | 0.56824100  | 1.53113800  |
| C            | -5.17780500 | -0.60923600 | 1.74145800  |
| C            | -4.57971700 | 1.73060800  | 2.46642700  |
| H            | -3.21219800 | 0.22728600  | 1.78823000  |
| H            | -5.04768600 | -1.01264800 | 2.74936800  |

|   |             |             |             |
|---|-------------|-------------|-------------|
| H | -6.22384800 | -0.30214400 | 1.64373600  |
| H | -4.99343000 | -1.41501400 | 1.02445100  |
| H | -3.86262700 | 2.54741400  | 2.35994600  |
| H | -5.58083900 | 2.11197800  | 2.23752000  |
| H | -4.57410500 | 1.39337200  | 3.50726400  |
| C | -2.57881800 | -1.66789700 | -1.72341400 |
| C | -1.69703600 | -0.82606800 | -2.26603500 |
| C | -0.40992300 | -0.41727300 | -1.55963300 |
| O | 0.51476200  | 0.09603500  | -2.31515800 |
| C | -3.85849000 | -2.07199200 | -2.39425600 |
| H | -3.93300200 | -3.16138800 | -2.48569200 |
| H | -4.71460800 | -1.73954300 | -1.79381400 |
| H | -3.94493100 | -1.62700200 | -3.38784500 |
| C | -2.36003600 | -2.15548600 | -0.31492200 |
| H | -2.79311600 | -1.42041700 | 0.37572000  |
| H | -2.90572400 | -3.08927100 | -0.14276300 |
| H | -1.82901200 | -0.41992900 | -3.26552100 |
| C | -0.87011700 | -2.35179100 | 0.05684000  |
| N | 0.10433200  | -1.69984200 | -0.82986400 |
| N | 0.53256900  | -2.59268100 | -1.82502800 |
| O | 1.98308400  | -2.64577300 | -3.56629200 |
| C | 2.86455500  | -1.90363000 | -1.48979900 |
| C | 3.04192900  | -2.47113700 | -0.22598200 |
| C | 4.11490500  | -2.06936100 | 0.56538900  |
| C | 4.99113600  | -1.08440400 | 0.10655100  |
| C | 4.79742000  | -0.50434000 | -1.14661000 |
| C | 3.74595700  | -0.92880700 | -1.95324500 |
| H | 2.33064600  | -3.20560400 | 0.13845900  |
| H | 4.26892200  | -2.52358600 | 1.54020000  |
| H | 5.46231000  | 0.28116200  | -1.49223200 |
| H | 3.57459700  | -0.49092000 | -2.93091100 |
| C | -0.59370500 | -1.88599700 | 1.48932600  |
| O | -1.28252800 | -1.11715100 | 2.12529600  |
| O | 0.52595600  | -2.43747200 | 1.96340400  |
| C | 0.85313300  | -2.13879200 | 3.33736900  |
| C | 0.03845100  | -3.00185600 | 4.28135900  |
| H | 0.68521600  | -1.07422700 | 3.51464400  |
| H | 1.91973500  | -2.36147900 | 3.41509100  |
| H | 0.33969000  | -2.80550700 | 5.31335600  |
| H | -1.02451100 | -2.77211700 | 4.18397000  |
| H | 0.19762100  | -4.06146800 | 4.06894400  |
| H | -0.61774400 | -3.41399400 | 0.03584900  |
| H | -0.16324000 | -2.77655900 | -2.55108300 |
| C | 1.77075400  | -2.36273000 | -2.40158800 |

|   |             |              |             |
|---|-------------|--------------|-------------|
| H | 5. 82842300 | -0. 77245100 | 0. 72420200 |
|---|-------------|--------------|-------------|

**M6(S)**

|   |              |              |              |
|---|--------------|--------------|--------------|
| C | 5. 32548300  | 0. 02391700  | -0. 85108700 |
| C | 4. 01059400  | -0. 41463600 | -0. 98317200 |
| C | 3. 55159700  | -1. 03121600 | -2. 14560400 |
| C | 4. 46572400  | -1. 23036200 | -3. 17863400 |
| C | 5. 79275400  | -0. 81461800 | -3. 04771700 |
| C | 6. 23181400  | -0. 18030200 | -1. 88736000 |
| C | 5. 54730400  | 0. 70498300  | 0. 47566700  |
| C | 4. 13646900  | 0. 87355900  | 1. 08992400  |
| C | 3. 20568100  | -0. 08028700 | 0. 25337400  |
| H | 2. 50613900  | -1. 32823400 | -2. 25100400 |
| H | 4. 13916200  | -1. 70642600 | -4. 09726700 |
| H | 6. 48818600  | -0. 97517400 | -3. 86543700 |
| H | 7. 25931900  | 0. 15980400  | -1. 79903100 |
| H | 6. 03085100  | 1. 68279900  | 0. 38396500  |
| H | 4. 12125300  | 0. 57866700  | 2. 14024400  |
| H | 6. 17548700  | 0. 09580600  | 1. 13359900  |
| H | 2. 94419800  | -0. 95816100 | 0. 84551700  |
| N | 1. 95637300  | 0. 59259300  | -0. 11649500 |
| O | 3. 69884700  | 2. 22305100  | 1. 10662300  |
| C | 0. 72185700  | 0. 12094300  | -0. 39824000 |
| C | 1. 97413800  | 1. 92532600  | -0. 43047700 |
| N | 0. 04370500  | 1. 19238700  | -0. 83732100 |
| N | 0. 82097300  | 2. 31722800  | -0. 86673600 |
| C | 3. 21928000  | 2. 69433700  | -0. 14043000 |
| H | 3. 96161600  | 2. 55838900  | -0. 93880300 |
| H | 2. 99286000  | 3. 75531400  | -0. 03741900 |
| C | -1. 32629300 | 1. 32696200  | -1. 27636400 |
| C | -1. 77790200 | 0. 46367300  | -2. 27255200 |
| C | -2. 11671300 | 2. 35417700  | -0. 74488100 |
| C | -3. 06362200 | 0. 62164700  | -2. 77258600 |
| C | -3. 39368400 | 2. 49893100  | -1. 30139700 |
| C | -3. 86763300 | 1. 65340200  | -2. 29655900 |
| H | -3. 43230800 | -0. 06612600 | -3. 52627000 |
| H | -4. 03878500 | 3. 28865900  | -0. 92707100 |
| H | -1. 11922700 | -0. 33726400 | -2. 59908500 |
| H | -4. 87195300 | 1. 78797200  | -2. 68542000 |
| C | -1. 67197300 | 3. 29449000  | 0. 36513600  |
| C | -2. 68669200 | 3. 34597000  | 1. 51084700  |
| C | -1. 40541700 | 4. 69391800  | -0. 20074000 |
| H | -0. 74486500 | 2. 90925600  | 0. 79261200  |
| H | -2. 32718800 | 4. 02603000  | 2. 28947300  |

|   |             |             |             |
|---|-------------|-------------|-------------|
| H | -3.66395100 | 3.71120100  | 1.17926000  |
| H | -2.80779900 | 2.35518900  | 1.95406200  |
| H | -0.64986800 | 4.65463900  | -0.98886300 |
| H | -2.32190400 | 5.12007100  | -0.62301100 |
| H | -1.05437200 | 5.36577900  | 0.58888900  |
| C | 0.93095800  | -3.10308700 | 1.24695500  |
| C | 1.22460100  | -2.35669400 | 0.18073700  |
| C | 0.28450200  | -1.37891000 | -0.53209800 |
| O | 0.27132300  | -1.65029600 | -1.81754100 |
| C | 1.83025100  | -4.19713200 | 1.74496400  |
| H | 2.71758400  | -4.30728800 | 1.11760200  |
| H | 2.14887800  | -3.98970400 | 2.77325200  |
| H | 1.29811300  | -5.15491400 | 1.76433400  |
| C | -0.36112000 | -2.91088000 | 1.98748400  |
| H | -0.18952000 | -2.92742600 | 3.06893800  |
| H | -1.03256100 | -3.74743900 | 1.75716400  |
| H | 2.13086000  | -2.56590300 | -0.38476800 |
| C | -1.04836500 | -1.61663400 | 1.57797600  |
| N | -1.10860600 | -1.40299800 | 0.11860300  |
| N | -1.82425700 | -2.44704200 | -0.50476800 |
| O | -3.44609800 | -3.06217100 | -1.90663400 |
| C | -4.13101500 | -1.43441800 | -0.32968000 |
| C | -3.87227500 | -0.31882700 | 0.47403400  |
| C | -4.93455200 | 0.41321500  | 1.00354600  |
| C | -6.25121500 | 0.04780300  | 0.74657800  |
| C | -6.51343000 | -1.05576000 | -0.06330200 |
| C | -5.46076900 | -1.78403700 | -0.59966300 |
| H | -2.85625400 | 0.01550300  | 0.65021000  |
| H | -4.72467800 | 1.28766700  | 1.61109800  |
| H | -7.53716800 | -1.34612600 | -0.27774200 |
| H | -5.64382800 | -2.63712100 | -1.24287200 |
| C | -0.43350700 | -0.34993200 | 2.17620800  |
| O | -0.90932800 | 0.75300600  | 2.02209600  |
| O | 0.68550100  | -0.56998100 | 2.87232200  |
| C | 1.32558700  | 0.59128500  | 3.43138400  |
| C | 2.40080500  | 0.09369100  | 4.37184600  |
| H | 0.57603100  | 1.19944400  | 3.94333700  |
| H | 1.73770900  | 1.19179400  | 2.61003000  |
| H | 2.97409500  | 0.93787300  | 4.76200200  |
| H | 1.95792800  | -0.44543500 | 5.21205500  |
| H | 3.08460900  | -0.58591500 | 3.85532700  |
| H | -2.08550600 | -1.61489700 | 1.93283700  |
| H | -1.23477800 | -2.92356600 | -1.18968700 |
| C | -3.10621100 | -2.31818500 | -0.99550400 |

|               |             |             |             |
|---------------|-------------|-------------|-------------|
| H             | -7.06972400 | 0.62333400  | 1.16834300  |
| <b>TS7(R)</b> |             |             |             |
| C             | -3.41476600 | -2.47779300 | -0.47645300 |
| C             | -2.40422200 | -1.67234300 | -0.99490300 |
| C             | -2.18444200 | -1.58045300 | -2.36665500 |
| C             | -3.00305100 | -2.31911100 | -3.21752400 |
| C             | -4.02081600 | -3.12734800 | -2.70443900 |
| C             | -4.23466600 | -3.21068800 | -1.33100400 |
| C             | -3.47379100 | -2.39342100 | 1.02479700  |
| C             | -2.25103700 | -1.54084800 | 1.43537700  |
| C             | -1.66870300 | -0.93493100 | 0.10471800  |
| H             | -1.41282500 | -0.91931100 | -2.74996700 |
| H             | -2.85436700 | -2.26041100 | -4.29102900 |
| H             | -4.65046900 | -3.69548300 | -3.38220100 |
| H             | -5.02560700 | -3.83986700 | -0.93261500 |
| H             | -3.42454800 | -3.37239600 | 1.51419800  |
| H             | -2.53619600 | -0.72703700 | 2.10233900  |
| H             | -4.40039200 | -1.91412300 | 1.35515400  |
| H             | -1.82826200 | 0.14514300  | 0.05044600  |
| N             | -0.22091700 | -1.15369500 | 0.03754100  |
| O             | -1.30789700 | -2.30280600 | 2.18067800  |
| C             | 0.73480100  | -0.41895400 | -0.57905500 |
| C             | 0.34334500  | -2.29213900 | 0.54392200  |
| N             | 1.82768900  | -1.18572100 | -0.42888600 |
| N             | 1.61035400  | -2.34877800 | 0.27465500  |
| C             | -0.51627000 | -3.17076200 | 1.38801000  |
| H             | -1.13938400 | -3.82994800 | 0.76715700  |
| H             | 0.09473500  | -3.77851100 | 2.05502000  |
| C             | 3.12246600  | -0.96472800 | -1.00461300 |
| C             | 3.18444100  | -0.79872900 | -2.38703500 |
| C             | 4.26755100  | -0.94434900 | -0.19932500 |
| C             | 4.41149600  | -0.60231000 | -3.00499000 |
| C             | 5.49248100  | -0.76982500 | -0.85525400 |
| C             | 5.57156800  | -0.59885800 | -2.23248500 |
| H             | 4.46200200  | -0.46889100 | -4.08012800 |
| H             | 6.40472200  | -0.76313500 | -0.26601500 |
| H             | 2.26224200  | -0.82590000 | -2.95922100 |
| H             | 6.53945400  | -0.46202200 | -2.70393700 |
| C             | 4.21842400  | -1.12101900 | 1.30748300  |
| C             | 5.06689200  | -0.07313300 | 2.03553600  |
| C             | 4.65846500  | -2.54016700 | 1.68759800  |
| H             | 3.18437500  | -0.98434100 | 1.63220600  |
| H             | 4.90326800  | -0.15373300 | 3.11379900  |

|   |             |             |             |
|---|-------------|-------------|-------------|
| H | 6.13675700  | -0.21620500 | 1.85266300  |
| H | 4.80214700  | 0.94274300  | 1.72674500  |
| H | 4.00965600  | -3.28146500 | 1.21591100  |
| H | 5.68991400  | -2.72309900 | 1.36650000  |
| H | 4.61153900  | -2.67367300 | 2.77267500  |
| C | 2.46574600  | 2.28314500  | -1.14936600 |
| C | 1.50962300  | 1.85426100  | -1.97658900 |
| C | 0.19789300  | 1.34510800  | -1.47181100 |
| O | -0.73047600 | 1.09764100  | -2.25045900 |
| C | 3.80945600  | 2.75036800  | -1.62079600 |
| H | 4.03399100  | 3.75481600  | -1.24585200 |
| H | 4.58468000  | 2.07636100  | -1.23347900 |
| H | 3.87276800  | 2.75425300  | -2.71083300 |
| C | 2.28998900  | 2.14310700  | 0.33663800  |
| H | 2.72415500  | 1.17692300  | 0.62795400  |
| H | 2.87693800  | 2.90521400  | 0.86062300  |
| H | 1.63367000  | 1.85815600  | -3.05621200 |
| C | 0.82958200  | 2.18647300  | 0.83056500  |
| N | -0.21117300 | 2.01129200  | -0.19067200 |
| N | -0.78033700 | 3.24901100  | -0.55500300 |
| O | -2.42844200 | 3.99584600  | -1.91981000 |
| C | -3.03723500 | 2.29398300  | -0.37583500 |
| C | -3.14414300 | 2.26324700  | 1.01539600  |
| C | -4.12026100 | 1.47131500  | 1.61352300  |
| C | -4.96471700 | 0.68890500  | 0.82474200  |
| C | -4.83251600 | 0.69640100  | -0.56346300 |
| C | -3.88195000 | 1.51550000  | -1.16536900 |
| H | -2.46263000 | 2.85237500  | 1.61980000  |
| H | -4.23005200 | 1.46926400  | 2.69425400  |
| H | -5.47032000 | 0.06690700  | -1.17628800 |
| H | -3.76170800 | 1.53768100  | -2.24308700 |
| C | 0.61315500  | 1.17843800  | 1.96766400  |
| O | 1.42322300  | 0.36277000  | 2.34709200  |
| O | -0.58476200 | 1.34632100  | 2.53302700  |
| C | -0.84804400 | 0.56398800  | 3.71627200  |
| C | -0.13044500 | 1.14244100  | 4.92059600  |
| H | -0.56241300 | -0.47276200 | 3.52348600  |
| H | -1.93204400 | 0.62480000  | 3.83851700  |
| H | -0.40575600 | 0.58118500  | 5.81692600  |
| H | 0.95115700  | 1.07534800  | 4.79089700  |
| H | -0.41048300 | 2.18830000  | 5.06789600  |
| H | 0.62255500  | 3.16067500  | 1.28203400  |
| H | -0.18622000 | 3.82291100  | -1.15761200 |
| C | -2.07763700 | 3.22316600  | -1.04913300 |

|               |             |             |             |
|---------------|-------------|-------------|-------------|
| H             | -5.73151300 | 0.07871000  | 1.29317000  |
| <b>TS7(S)</b> |             |             |             |
| C             | 5.23677400  | -0.08455600 | -1.05895200 |
| C             | 3.90146500  | -0.47987300 | -1.07625700 |
| C             | 3.36296500  | -1.18778600 | -2.14819300 |
| C             | 4.21107400  | -1.53063300 | -3.19957800 |
| C             | 5.55784200  | -1.16119600 | -3.17718600 |
| C             | 6.07923700  | -0.43046100 | -2.11156100 |
| C             | 5.54922000  | 0.72359200  | 0.17545400  |
| C             | 4.17512400  | 1.03281900  | 0.81521300  |
| C             | 3.17471700  | 0.01393700  | 0.15724900  |
| H             | 2.30655000  | -1.45524100 | -2.17497600 |
| H             | 3.81796000  | -2.08232100 | -4.04709600 |
| H             | 6.20139000  | -1.43346200 | -4.00763900 |
| H             | 7.12127700  | -0.12435900 | -2.10979700 |
| H             | 6.07717800  | 1.65765400  | -0.04052200 |
| H             | 4.19920300  | 0.89214600  | 1.89695600  |
| H             | 6.17190200  | 0.15391900  | 0.87346100  |
| H             | 2.93432600  | -0.78807400 | 0.85924300  |
| N             | 1.92221000  | 0.66403000  | -0.20712200 |
| O             | 3.78711700  | 2.38928000  | 0.65471900  |
| C             | 0.65960600  | 0.16956500  | -0.28857500 |
| C             | 1.94339700  | 1.94139500  | -0.70136200 |
| N             | -0.01578000 | 1.20124200  | -0.82242200 |
| N             | 0.76237600  | 2.30693200  | -1.08211500 |
| C             | 3.22546900  | 2.69993100  | -0.61092400 |
| H             | 3.90491500  | 2.43085200  | -1.43135500 |
| H             | 3.03740000  | 3.77307000  | -0.63907900 |
| C             | -1.40203700 | 1.28700900  | -1.19924600 |
| C             | -1.87992100 | 0.36156400  | -2.12245000 |
| C             | -2.18280300 | 2.34480800  | -0.71713100 |
| C             | -3.17206500 | 0.49924400  | -2.61545800 |
| C             | -3.46695500 | 2.46531000  | -1.25604500 |
| C             | -3.95943700 | 1.56581000  | -2.19540600 |
| H             | -3.55778000 | -0.22665900 | -3.32355500 |
| H             | -4.10257200 | 3.27967600  | -0.91900400 |
| H             | -1.24066700 | -0.46371300 | -2.41968200 |
| H             | -4.96763200 | 1.68450900  | -2.57954400 |
| C             | -1.69677400 | 3.34086600  | 0.32289200  |
| C             | -2.68710600 | 3.47242700  | 1.48422800  |
| C             | -1.42558900 | 4.70360000  | -0.32454900 |
| H             | -0.76270400 | 2.96151700  | 0.74597300  |
| H             | -2.29212800 | 4.16951400  | 2.23004000  |

|   |             |             |             |
|---|-------------|-------------|-------------|
| H | -3.65463300 | 3.86174100  | 1.15051200  |
| H | -2.84082500 | 2.50490700  | 1.96650300  |
| H | -0.68538600 | 4.61091300  | -1.12220700 |
| H | -2.34629300 | 5.11465600  | -0.75293900 |
| H | -1.05401200 | 5.41474100  | 0.42015200  |
| C | 1.21420300  | -2.93297900 | 1.58743000  |
| C | 1.26558500  | -2.44906200 | 0.34301400  |
| C | 0.12861400  | -1.75585500 | -0.36509700 |
| O | -0.00602700 | -2.00745600 | -1.57618800 |
| C | 2.33179300  | -3.73002300 | 2.19215300  |
| H | 3.13728200  | -3.90477200 | 1.47559700  |
| H | 2.74044700  | -3.20174900 | 3.06206100  |
| H | 1.96724900  | -4.69844000 | 2.55206400  |
| C | 0.00107000  | -2.71244600 | 2.44734100  |
| H | 0.30083500  | -2.49624300 | 3.47798500  |
| H | -0.59109200 | -3.63629900 | 2.48025100  |
| H | 2.12522200  | -2.65657200 | -0.29010800 |
| C | -0.87259600 | -1.58645900 | 1.90553700  |
| N | -1.11229500 | -1.66759000 | 0.45211200  |
| N | -1.90705100 | -2.78946500 | 0.16529000  |
| O | -3.43448100 | -3.70337500 | -1.17761600 |
| C | -4.08765900 | -1.61037700 | -0.27417000 |
| C | -3.88778300 | -0.51840600 | 0.57628800  |
| C | -4.92748500 | 0.38023500  | 0.80355500  |
| C | -6.15664700 | 0.22148700  | 0.17197800  |
| C | -6.34921900 | -0.84651100 | -0.70196300 |
| C | -5.32343900 | -1.75795100 | -0.91586500 |
| H | -2.92679300 | -0.33005300 | 1.03607000  |
| H | -4.76176800 | 1.22456000  | 1.46566400  |
| H | -7.30223000 | -0.97667300 | -1.20510400 |
| H | -5.46130000 | -2.61078400 | -1.57098300 |
| C | -0.37604600 | -0.17958000 | 2.24119400  |
| O | -1.05810800 | 0.80783000  | 2.09396200  |
| O | 0.85981300  | -0.15845200 | 2.75518400  |
| C | 1.38294900  | 1.12534700  | 3.14139600  |
| C | 2.46726000  | 0.87555300  | 4.16746800  |
| H | 0.56988800  | 1.73608900  | 3.53959400  |
| H | 1.77429500  | 1.62250200  | 2.24472700  |
| H | 2.97126300  | 1.81311700  | 4.41311300  |
| H | 2.04334300  | 0.45616700  | 5.08250400  |
| H | 3.20986600  | 0.17058600  | 3.78347400  |
| H | -1.86360600 | -1.63658700 | 2.36736700  |
| H | -1.38681600 | -3.60865600 | -0.14369200 |
| C | -3.11277200 | -2.73067000 | -0.51232900 |



|             |             |             |             |
|-------------|-------------|-------------|-------------|
| H           | -6.95848300 | 0.93111300  | 0.35272300  |
| <b>P(R)</b> |             |             |             |
| C           | 3.14686400  | -0.80175700 | 0.71244300  |
| C           | 2.05370100  | -1.21619400 | 1.36834900  |
| C           | 0.82012600  | -1.60569600 | 0.64542600  |
| O           | 0.01311500  | -2.40755600 | 1.08374000  |
| C           | 4.46458500  | -0.55542600 | 1.37638800  |
| H           | 5.25246900  | -1.13384800 | 0.88160500  |
| H           | 4.73477200  | 0.50162800  | 1.27654000  |
| H           | 4.44312800  | -0.81981300 | 2.43468500  |
| C           | 3.06324200  | -0.56829200 | -0.77975400 |
| H           | 3.78009400  | 0.19403500  | -1.09086200 |
| H           | 3.29805600  | -1.49362300 | -1.31923900 |
| H           | 2.05883700  | -1.43031000 | 2.43158900  |
| C           | 1.65158100  | -0.09277600 | -1.11853700 |
| N           | 0.66261700  | -1.02834100 | -0.60349000 |
| N           | -0.23966300 | -1.60143100 | -1.49080100 |
| O           | -2.15853800 | -2.78841100 | -1.46342300 |
| C           | -2.22485800 | -0.73422900 | -0.27416000 |
| C           | -2.25249300 | 0.58739700  | -0.71340100 |
| C           | -3.00454300 | 1.52947700  | -0.01543100 |
| C           | -3.70018900 | 1.15600900  | 1.13190100  |
| C           | -3.66137500 | -0.16546300 | 1.57534900  |
| C           | -2.93876200 | -1.11486900 | 0.86274400  |
| H           | -1.69601700 | 0.87095100  | -1.60166700 |
| H           | -3.05379600 | 2.55531200  | -0.36828900 |
| H           | -4.20503600 | -0.45592200 | 2.46826100  |
| H           | -2.90675700 | -2.15183300 | 1.18005400  |
| C           | 1.50691700  | 1.33274800  | -0.55933700 |
| O           | 2.38862700  | 2.15336400  | -0.67481300 |
| O           | 0.34477100  | 1.54808700  | 0.03872100  |
| C           | 0.12465100  | 2.87004400  | 0.56741700  |
| C           | -0.18455900 | 3.86158000  | -0.53736000 |
| H           | 1.00946800  | 3.16890800  | 1.13471600  |
| H           | -0.72166300 | 2.74341000  | 1.24408800  |
| H           | -0.44699800 | 4.82829000  | -0.10024900 |
| H           | 0.68116000  | 3.99749500  | -1.18712400 |
| H           | -1.02938600 | 3.51451800  | -1.13772100 |
| H           | 1.50251100  | -0.02988300 | -2.19987500 |
| H           | 0.10790700  | -2.46684500 | -1.90263200 |
| C           | -1.56378500 | -1.80291800 | -1.08118900 |
| H           | -4.27984300 | 1.89424200  | 1.67727200  |

**P(S)**

|   |             |             |             |
|---|-------------|-------------|-------------|
| C | 3.30942400  | 0.70219900  | -0.26502600 |
| C | 3.03448800  | -0.45211300 | -0.87946600 |
| C | 2.04468600  | -1.42703400 | -0.36699800 |
| O | 1.98304500  | -2.57226700 | -0.77598800 |
| C | 4.38646200  | 1.63699300  | -0.72090200 |
| H | 4.94691200  | 1.22550800  | -1.56159300 |
| H | 3.95019300  | 2.59520300  | -1.02330000 |
| H | 5.08247500  | 1.84679300  | 0.09901800  |
| C | 2.54559700  | 1.09548700  | 0.97528700  |
| H | 2.43295500  | 2.18428200  | 1.02655000  |
| H | 3.12167900  | 0.79821100  | 1.86060100  |
| H | 3.57967400  | -0.78405000 | -1.75627800 |
| C | 1.15839200  | 0.44654900  | 1.01745300  |
| N | 1.23536700  | -0.96668100 | 0.66091600  |
| N | 0.46055500  | -1.86890000 | 1.35764700  |
| O | -1.52502200 | -2.27755800 | 2.33358900  |
| C | -1.61409200 | -1.31099500 | 0.15837000  |
| C | -1.17702800 | -1.61263200 | -1.13221600 |
| C | -1.89297000 | -1.13382400 | -2.22463100 |
| C | -3.02966900 | -0.35278900 | -2.03019100 |
| C | -3.46981400 | -0.06054100 | -0.73898200 |
| C | -2.76749200 | -0.54908400 | 0.35705600  |
| H | -0.29068200 | -2.22524600 | -1.27292600 |
| H | -1.56038900 | -1.36794500 | -3.23029500 |
| H | -4.36146700 | 0.54061200  | -0.58822300 |
| H | -3.10040300 | -0.35282200 | 1.37184200  |
| C | 0.22864700  | 1.20498700  | 0.06271200  |
| O | 0.26168900  | 1.11301400  | -1.13820100 |
| O | -0.58345000 | 2.01937100  | 0.74263300  |
| C | -1.49914700 | 2.79448500  | -0.05688100 |
| C | -2.57112400 | 3.31856800  | 0.87086200  |
| H | -1.90810700 | 2.14404400  | -0.83377500 |
| H | -0.93819000 | 3.60004800  | -0.54078300 |
| H | -3.28244200 | 3.92769800  | 0.30834100  |
| H | -3.11185400 | 2.48740900  | 1.33063800  |
| H | -2.13736000 | 3.93312100  | 1.66293200  |
| H | 0.74370100  | 0.50984600  | 2.02526200  |
| H | 0.86702200  | -2.21733000 | 2.21985400  |
| C | -0.92228000 | -1.84706400 | 1.36736100  |
| H | -3.57973800 | 0.02404800  | -2.88691800 |

**Z-TS6(R)**

|   |             |            |             |
|---|-------------|------------|-------------|
| C | -2.18876100 | 3.66699800 | -1.12531000 |
|---|-------------|------------|-------------|

|   |             |             |             |
|---|-------------|-------------|-------------|
| C | -1.81085500 | 2.32798200  | -1.07497100 |
| C | -2.65614100 | 1.34996700  | -0.56530800 |
| C | -3.88908800 | 1.74657300  | -0.05448000 |
| C | -4.26390300 | 3.09354900  | -0.06778400 |
| C | -3.42193900 | 4.06195900  | -0.61140900 |
| C | -1.15298600 | 4.51199000  | -1.81576900 |
| C | 0.03775400  | 3.56298700  | -2.09615600 |
| C | -0.45034900 | 2.11061800  | -1.68776700 |
| H | -2.36227000 | 0.30584100  | -0.55169400 |
| H | -4.55429700 | 0.99032100  | 0.34787300  |
| H | -5.22724000 | 3.38857500  | 0.33727200  |
| H | -3.72480200 | 5.10471400  | -0.64094000 |
| H | -0.81497000 | 5.36322100  | -1.21490300 |
| H | 0.30241700  | 3.55654500  | -3.15381600 |
| H | -1.54199000 | 4.92271200  | -2.75248200 |
| H | -0.50271400 | 1.44823100  | -2.54940200 |
| N | 0.52420700  | 1.48066600  | -0.76383600 |
| O | 1.21816900  | 3.99626800  | -1.44202300 |
| C | 0.95548100  | 0.20398800  | -0.64987500 |
| C | 1.32204000  | 2.24559500  | 0.04145900  |
| N | 2.01936200  | 0.26897700  | 0.17254300  |
| N | 2.25757600  | 1.53877700  | 0.60165000  |
| C | 1.19635400  | 3.72540700  | -0.05183200 |
| H | 0.27171900  | 4.07691400  | 0.42388000  |
| H | 2.05559100  | 4.20695800  | 0.41420200  |
| C | 3.09936700  | -0.68181500 | 0.31622500  |
| C | 3.21919900  | -1.39089000 | 1.50443000  |
| C | 3.99636300  | -0.82042200 | -0.75012200 |
| C | 4.23724600  | -2.32867300 | 1.62605500  |
| C | 5.00041200  | -1.78200300 | -0.59662000 |
| C | 5.11749800  | -2.53469500 | 0.56655000  |
| H | 4.33294000  | -2.89600000 | 2.54523700  |
| H | 5.70753300  | -1.93818600 | -1.40620000 |
| H | 2.52495800  | -1.22657300 | 2.32096600  |
| H | 5.90656600  | -3.27494600 | 0.65060600  |
| C | 3.91407200  | 0.00019600  | -2.02594700 |
| C | 3.50598400  | -0.87817500 | -3.21497400 |
| C | 5.23741000  | 0.72335700  | -2.30124800 |
| H | 3.15141500  | 0.77676600  | -1.89797800 |
| H | 3.41877100  | -0.27341800 | -4.12211200 |
| H | 4.26008100  | -1.65124900 | -3.39517400 |
| H | 2.54912800  | -1.37651600 | -3.03409700 |
| H | 5.52999900  | 1.34422000  | -1.45076400 |
| H | 6.04455200  | 0.01169100  | -2.49935500 |

|   |             |             |             |
|---|-------------|-------------|-------------|
| H | 5.13660800  | 1.36481400  | -3.18111200 |
| C | 0.03658900  | -3.43520500 | -0.98271300 |
| C | 0.78643000  | -2.27635400 | -0.97006300 |
| C | 0.24842100  | -0.98761100 | -1.27313900 |
| O | -0.71589500 | -0.70523000 | -1.99863900 |
| C | 0.67857500  | -4.72645200 | -0.54402100 |
| H | 1.70407700  | -4.57487100 | -0.19807400 |
| H | 0.10137100  | -5.18646400 | 0.26715500  |
| H | 0.69595700  | -5.44967500 | -1.36595900 |
| C | -1.37240200 | -3.39824500 | -1.12666100 |
| H | -1.77725200 | -2.66058400 | -1.80911100 |
| H | -1.89306500 | -4.35376600 | -1.12234700 |
| H | 1.79922000  | -2.34045300 | -0.59856700 |
| C | -1.92804500 | -2.61971200 | 0.56510100  |
| N | -1.27244100 | -1.52011900 | 0.97878700  |
| N | -0.33497400 | -1.83287900 | 1.94744100  |
| O | 0.99074400  | -1.49126300 | 3.70845300  |
| C | -0.04059300 | 0.46956700  | 2.84579400  |
| C | -1.13377500 | 1.09256500  | 2.23549400  |
| C | -1.27576400 | 2.47841300  | 2.30715400  |
| C | -0.33324900 | 3.24877800  | 2.98465900  |
| C | 0.75787600  | 2.63150700  | 3.59682300  |
| C | 0.89614900  | 1.25064100  | 3.53555300  |
| H | -1.86564700 | 0.49221400  | 1.71256200  |
| H | -2.13259400 | 2.94788500  | 1.82931300  |
| H | 1.49449000  | 3.22509000  | 4.12901200  |
| H | 1.72544200  | 0.74861600  | 4.02173600  |
| C | -3.35446800 | -2.40280500 | 0.15425900  |
| O | -3.87270100 | -1.34331700 | -0.10772300 |
| O | -4.00861300 | -3.57751500 | 0.10471000  |
| C | -5.36010800 | -3.52536700 | -0.38002000 |
| C | -5.38305800 | -3.42319300 | -1.89348100 |
| H | -5.87076300 | -2.67816900 | 0.08335600  |
| H | -5.81330300 | -4.45483700 | -0.03177800 |
| H | -6.41399500 | -3.44982800 | -2.25551900 |
| H | -4.92606000 | -2.48542200 | -2.21596200 |
| H | -4.83666500 | -4.25775200 | -2.33989700 |
| H | -1.82754200 | -3.53278200 | 1.16382200  |
| H | -0.06114100 | -2.80495500 | 2.08116000  |
| C | 0.21149200  | -1.01032800 | 2.87041300  |
| H | -0.45163500 | 4.32744100  | 3.04297100  |

**Z-TS-6(S)**

|   |             |            |             |
|---|-------------|------------|-------------|
| C | -5.46429200 | 0.36700500 | -0.71468700 |
|---|-------------|------------|-------------|

|   |             |             |             |
|---|-------------|-------------|-------------|
| C | -4.30996800 | 0.78574900  | -0.04482400 |
| C | -3.78555900 | 2.05992700  | -0.24260100 |
| C | -4.41830800 | 2.90156800  | -1.15489500 |
| C | -5.55782200 | 2.47981800  | -1.84049300 |
| C | -6.09512100 | 1.21226500  | -1.61925200 |
| C | -5.86729000 | -1.01966100 | -0.28328200 |
| C | -5.11305600 | -1.16736400 | 1.05562100  |
| C | -3.83942800 | -0.29424900 | 0.90394400  |
| H | -2.90767300 | 2.38787200  | 0.30438700  |
| H | -4.02196600 | 3.89725300  | -1.32505400 |
| H | -6.04002600 | 3.15157000  | -2.54356000 |
| H | -6.99627000 | 0.89639100  | -2.13599900 |
| H | -5.53659800 | -1.76016200 | -1.02154500 |
| H | -5.71108800 | -0.71361200 | 1.84895700  |
| H | -6.94483200 | -1.14437600 | -0.15714400 |
| H | -3.44350900 | 0.08049400  | 1.84866300  |
| N | -2.78450200 | -1.16599800 | 0.32105000  |
| O | -4.85307700 | -2.48373700 | 1.49263800  |
| C | -1.56562300 | -0.81467000 | -0.12666200 |
| C | -2.88773000 | -2.52149000 | 0.15366400  |
| N | -0.98833300 | -1.93377400 | -0.53748700 |
| N | -1.80496400 | -3.01462100 | -0.37697100 |
| C | -4.11222800 | -3.26794700 | 0.58660800  |
| H | -4.70452200 | -3.56077700 | -0.28871400 |
| H | -3.81122900 | -4.17532200 | 1.11266100  |
| C | 0.36717000  | -2.09968100 | -1.00379200 |
| C | 0.53211900  | -2.34941000 | -2.36066900 |
| C | 1.42370800  | -2.03532200 | -0.08620100 |
| C | 1.81300100  | -2.54608000 | -2.85871600 |
| C | 2.69631100  | -2.24335200 | -0.62573900 |
| C | 2.89090800  | -2.49322100 | -1.98147800 |
| H | 1.96722100  | -2.72524200 | -3.91644900 |
| H | 3.56265300  | -2.18487900 | 0.02343400  |
| H | -0.34020700 | -2.38189400 | -3.00587200 |
| H | 3.90053000  | -2.62588900 | -2.35640000 |
| C | 1.19791900  | -1.77844800 | 1.39737800  |
| C | 2.49074100  | -1.46979300 | 2.14537300  |
| C | 0.49775100  | -2.97004100 | 2.07055200  |
| H | 0.57561400  | -0.87687900 | 1.47973300  |
| H | 2.25036900  | -1.22372800 | 3.18421600  |
| H | 3.16251300  | -2.33585500 | 2.15851300  |
| H | 2.99415100  | -0.61301400 | 1.69668000  |
| H | 1.13911400  | -3.85646300 | 2.02330300  |
| H | 0.31447300  | -2.74456600 | 3.12579600  |

|                |             |             |             |
|----------------|-------------|-------------|-------------|
| H              | -0.45630800 | -3.23153700 | 1.60882900  |
| C              | -0.32602100 | 2.44910700  | -1.56777000 |
| C              | -0.77190400 | 1.15424100  | -1.37506600 |
| C              | -1.03594000 | 0.60432400  | -0.09342500 |
| O              | -1.09312700 | 1.12323700  | 1.03229100  |
| C              | -0.12852300 | 2.98638900  | -2.96127500 |
| H              | -0.22670600 | 2.20908000  | -3.72298900 |
| H              | -0.86945500 | 3.76532800  | -3.17263500 |
| H              | 0.85882800  | 3.45039800  | -3.05708000 |
| C              | 0.09507300  | 3.22551200  | -0.44723700 |
| H              | -0.55741400 | 3.19822200  | 0.41795400  |
| H              | 0.43220600  | 4.23325100  | -0.68850000 |
| H              | -0.94080600 | 0.50438700  | -2.23021100 |
| C              | 1.54189600  | 2.34839200  | 0.33609500  |
| N              | 1.80903600  | 1.07478200  | -0.06134800 |
| N              | 2.33499800  | 1.13610400  | -1.36298800 |
| O              | 3.66805600  | 0.48630100  | -3.04455100 |
| C              | 4.63214800  | 0.33127700  | -0.88130000 |
| C              | 4.73437300  | 0.78618100  | 0.43631800  |
| C              | 5.84515500  | 0.44717300  | 1.20771600  |
| C              | 6.85787900  | -0.34769700 | 0.67899200  |
| C              | 6.76849500  | -0.79109700 | -0.63979000 |
| C              | 5.66913700  | -0.44194300 | -1.41440100 |
| H              | 3.93783600  | 1.37782200  | 0.86849600  |
| H              | 5.91308600  | 0.80508000  | 2.23045600  |
| H              | 7.55916500  | -1.40173800 | -1.06476000 |
| H              | 5.58709400  | -0.75207100 | -2.45065100 |
| C              | 1.24380000  | 2.48753100  | 1.81638400  |
| O              | 0.77263600  | 3.48142000  | 2.32367000  |
| O              | 1.63133900  | 1.41574200  | 2.52035800  |
| C              | 1.32595800  | 1.43674200  | 3.91999700  |
| C              | -0.09033900 | 0.94544500  | 4.15093300  |
| H              | 1.46491000  | 2.44885700  | 4.30594500  |
| H              | 2.06241600  | 0.77220400  | 4.37712000  |
| H              | -0.30970300 | 0.91351000  | 5.22162400  |
| H              | -0.80099300 | 1.61123200  | 3.65744800  |
| H              | -0.21416200 | -0.05827700 | 3.73287500  |
| H              | 2.26046500  | 3.12043800  | 0.02707400  |
| H              | 1.65875100  | 1.29459400  | -2.10953800 |
| C              | 3.50327500  | 0.64364000  | -1.83036300 |
| H              | 7.71580100  | -0.61576900 | 1.28795400  |
| <b>Z-M6(R)</b> |             |             |             |
| C              | 5.09076700  | 0.35199200  | -0.61814800 |

|   |             |             |             |
|---|-------------|-------------|-------------|
| C | 4.00793600  | -0.14763800 | 0.11165000  |
| C | 3.86564000  | -1.51413800 | 0.34200700  |
| C | 4.79916200  | -2.37807800 | -0.22691900 |
| C | 5.85303400  | -1.88539000 | -0.99946100 |
| C | 6.01478200  | -0.51458300 | -1.19182200 |
| C | 5.10835700  | 1.85744800  | -0.57754600 |
| C | 4.27007900  | 2.11280500  | 0.69244300  |
| C | 3.19408600  | 0.99158300  | 0.68528300  |
| H | 3.01165500  | -1.87089700 | 0.91001700  |
| H | 4.70422600  | -3.44751700 | -0.06710000 |
| H | 6.56826100  | -2.57641400 | -1.43503300 |
| H | 6.85815200  | -0.13009500 | -1.75759600 |
| H | 4.63236200  | 2.28000900  | -1.47084600 |
| H | 4.89915700  | 1.91100400  | 1.56303100  |
| H | 6.11048600  | 2.28448300  | -0.49982200 |
| H | 2.77541200  | 0.75887200  | 1.66421400  |
| N | 2.01268100  | 1.49876900  | -0.11123500 |
| O | 3.78856700  | 3.42229800  | 0.87917800  |
| C | 0.79629000  | 0.91487600  | -0.31010800 |
| C | 1.82927900  | 2.84535400  | -0.31751300 |
| N | -0.04198100 | 1.91309300  | -0.58200200 |
| N | 0.59836900  | 3.12513500  | -0.60838800 |
| C | 2.92339000  | 3.84791800  | -0.14532500 |
| H | 3.45463600  | 4.00070200  | -1.09346300 |
| H | 2.48293200  | 4.79759600  | 0.16014600  |
| C | -1.48610300 | 1.99500200  | -0.57114600 |
| C | -2.09882300 | 2.41217600  | -1.74664500 |
| C | -2.16629000 | 1.85100600  | 0.64501600  |
| C | -3.45595200 | 2.70317500  | -1.73842600 |
| C | -3.53000900 | 2.16654500  | 0.61497800  |
| C | -4.16608700 | 2.59003500  | -0.54657200 |
| H | -3.95012800 | 3.01161600  | -2.65303600 |
| H | -4.11544000 | 2.05975600  | 1.52090300  |
| H | -1.50650000 | 2.49759200  | -2.65155800 |
| H | -5.22835400 | 2.81070500  | -0.52376100 |
| C | -1.46870500 | 1.40106700  | 1.92334500  |
| C | -2.45115100 | 0.94259300  | 3.00150900  |
| C | -0.58559400 | 2.51685900  | 2.50442700  |
| H | -0.83314000 | 0.53754400  | 1.68122000  |
| H | -1.89072100 | 0.55937800  | 3.85854300  |
| H | -3.06882700 | 1.77177500  | 3.36350300  |
| H | -3.10884200 | 0.14775800  | 2.63942900  |
| H | -1.19662600 | 3.38489700  | 2.77388300  |
| H | -0.08526900 | 2.15845400  | 3.40950800  |

|   |             |             |             |
|---|-------------|-------------|-------------|
| H | 0.18418900  | 2.86033900  | 1.81021400  |
| C | 1.25930400  | -2.53824400 | -1.61924400 |
| C | 1.47985300  | -1.26645200 | -1.28060400 |
| C | 0.64955100  | -0.61076500 | -0.15531000 |
| O | 1.03712900  | -0.89233800 | 1.07519000  |
| C | 2.13830400  | -3.27985500 | -2.58475600 |
| H | 2.91287100  | -2.62932500 | -2.99771200 |
| H | 2.63295000  | -4.11574700 | -2.07588200 |
| H | 1.55437200  | -3.70576500 | -3.40830000 |
| C | 0.11194500  | -3.32074600 | -1.03165500 |
| H | 0.50258100  | -4.17433100 | -0.46804900 |
| H | -0.47375700 | -3.73647000 | -1.86113900 |
| H | 2.30210300  | -0.72117200 | -1.73547100 |
| C | -0.80545100 | -2.50647900 | -0.10408400 |
| N | -0.78994200 | -1.04776600 | -0.37332700 |
| N | -1.18947800 | -0.80300000 | -1.69636100 |
| O | -2.58441900 | -0.52279000 | -3.39572800 |
| C | -3.67740500 | -0.66201600 | -1.29583100 |
| C | -3.71107900 | -0.91625900 | 0.07954600  |
| C | -4.93238900 | -0.93446100 | 0.75254800  |
| C | -6.12094300 | -0.67844100 | 0.07805600  |
| C | -6.09192700 | -0.41192500 | -1.29026000 |
| C | -4.88122200 | -0.41408500 | -1.96835900 |
| H | -2.79741000 | -1.06663100 | 0.64100100  |
| H | -4.94650400 | -1.14564700 | 1.81798500  |
| H | -7.01321900 | -0.21049200 | -1.82760500 |
| H | -4.83675100 | -0.21858500 | -3.03358500 |
| C | -0.52321600 | -2.78503700 | 1.37096500  |
| O | 0.17854400  | -3.68334800 | 1.77270300  |
| O | -1.31035700 | -2.04271300 | 2.16773000  |
| C | -1.07799900 | -2.20266700 | 3.57458900  |
| C | 0.19065200  | -1.48799500 | 4.00196500  |
| H | -1.02508100 | -3.26961700 | 3.80626700  |
| H | -1.96490800 | -1.77801900 | 4.04967800  |
| H | 0.31735000  | -1.57745900 | 5.08478200  |
| H | 1.05304900  | -1.92305200 | 3.49493500  |
| H | 0.14643700  | -0.43076800 | 3.72789300  |
| H | -1.84411100 | -2.82300900 | -0.26052500 |
| H | -0.51323700 | -1.00888100 | -2.42850300 |
| C | -2.45903400 | -0.65094500 | -2.18100700 |
| H | -7.06578100 | -0.69048300 | 0.61292800  |

**Z-M6(S)**

|   |            |             |             |
|---|------------|-------------|-------------|
| C | 3.27437000 | -2.45692900 | -1.17279300 |
|---|------------|-------------|-------------|



|   |              |              |              |
|---|--------------|--------------|--------------|
| C | 2. 47279100  | -1. 32494200 | -1. 05639800 |
| C | 2. 99585900  | -0. 11348500 | -0. 62527100 |
| C | 4. 33392400  | -0. 06114400 | -0. 24537300 |
| C | 5. 13903100  | -1. 20130000 | -0. 33144600 |
| C | 4. 61729200  | -2. 40314800 | -0. 80507700 |
| C | 2. 52284900  | -3. 61412900 | -1. 76594500 |
| C | 1. 11902100  | -3. 05313900 | -2. 10008600 |
| C | 1. 06807400  | -1. 56605100 | -1. 54633500 |
| H | 2. 34134500  | 0. 74761100  | -0. 59491900 |
| H | 4. 73879700  | 0. 87401300  | 0. 12840400  |
| H | 6. 18262900  | -1. 14813500 | -0. 03611900 |
| H | 5. 24925600  | -3. 28215100 | -0. 89491800 |
| H | 2. 44129900  | -4. 46133900 | -1. 07552100 |
| H | 0. 97648300  | -2. 99818500 | -3. 18027900 |
| H | 3. 00879200  | -3. 99557500 | -2. 66836800 |
| H | 0. 80204800  | -0. 84082200 | -2. 31543300 |
| N | -0. 02604100 | -1. 41494500 | -0. 53609800 |
| O | 0. 08847800  | -3. 91341200 | -1. 64918500 |
| C | -0. 83813700 | -0. 35992100 | -0. 28047300 |
| C | -0. 61952500 | -2. 51269500 | 0. 03038500  |
| N | -1. 89292200 | -0. 88348700 | 0. 36298500  |
| N | -1. 76693200 | -2. 22566100 | 0. 56547900  |
| C | -0. 06541500 | -3. 86182000 | -0. 24318600 |
| H | 0. 88354400  | -4. 01408500 | 0. 28728300  |
| H | -0. 78014900 | -4. 62724900 | 0. 05787900  |
| C | -3. 22907500 | -0. 33298400 | 0. 43517300  |
| C | -3. 65686600 | 0. 31033900  | 1. 58645800  |
| C | -4. 03376200 | -0. 49245400 | -0. 70349900 |
| C | -4. 92468600 | 0. 88363200  | 1. 59979400  |
| C | -5. 29693200 | 0. 10203000  | -0. 65483500 |
| C | -5. 73474300 | 0. 79247600  | 0. 47285100  |
| H | -5. 27147200 | 1. 39852800  | 2. 48900000  |
| H | -5. 95379400 | 0. 02294100  | -1. 51483100 |
| H | -3. 01171800 | 0. 36385900  | 2. 45760900  |
| H | -6. 72052000 | 1. 24647100  | 0. 47319300  |
| C | -3. 55812200 | -1. 23777000 | -1. 94546400 |
| C | -2. 89322400 | -0. 30102800 | -2. 96853300 |
| C | -4. 69799900 | -2. 01284100 | -2. 61567700 |
| H | -2. 81498300 | -1. 97874100 | -1. 63033500 |
| H | -2. 66422600 | -0. 86251200 | -3. 87953600 |
| H | -3. 57442600 | 0. 51395800  | -3. 23686800 |
| H | -1. 95913700 | 0. 14610500  | -2. 61295400 |
| H | -5. 25207900 | -2. 61779700 | -1. 89331100 |
| H | -5. 40210100 | -1. 33890300 | -3. 11365100 |

|   |             |             |             |
|---|-------------|-------------|-------------|
| H | -4.28878300 | -2.67703100 | -3.38115400 |
| C | -1.54688800 | 3.33979000  | -0.67459200 |
| C | -1.73479500 | 2.02062000  | -0.74258000 |
| C | -0.48499100 | 1.13561000  | -0.61781800 |
| O | 0.34377500  | 1.19273400  | -1.62174800 |
| C | -2.64420400 | 4.34774000  | -0.85336500 |
| H | -3.61201300 | 3.86119500  | -0.99760000 |
| H | -2.71247100 | 5.00894400  | 0.01804700  |
| H | -2.44352400 | 4.98755900  | -1.72044400 |
| C | -0.13811000 | 3.84427100  | -0.50672300 |
| H | 0.35619000  | 3.76557500  | -1.47696700 |
| H | -0.12144500 | 4.89596400  | -0.20585800 |
| H | -2.72366600 | 1.62271000  | -0.93541700 |
| C | 0.66896300  | 3.01085400  | 0.51864800  |
| N | 0.22707600  | 1.60767400  | 0.69321600  |
| N | -0.60091300 | 1.53700400  | 1.81775300  |
| O | -1.36841800 | 0.69086900  | 3.73509500  |
| C | 0.41676900  | -0.52874600 | 2.76234700  |
| C | 1.72065400  | -0.46305900 | 2.26726900  |
| C | 2.50847700  | -1.61398100 | 2.26243300  |
| C | 2.00293700  | -2.82242900 | 2.73435800  |
| C | 0.70421000  | -2.88533600 | 3.23931400  |
| C | -0.07942000 | -1.73787700 | 3.26635000  |
| H | 2.11304900  | 0.47149100  | 1.88004400  |
| H | 3.51849000  | -1.56351500 | 1.86756300  |
| H | 0.30586100  | -3.82205500 | 3.61672300  |
| H | -1.08906300 | -1.76062500 | 3.66276700  |
| C | 2.17690700  | 3.10031100  | 0.30846300  |
| O | 2.98380400  | 2.42507300  | 0.90606400  |
| O | 2.51310800  | 4.08572900  | -0.52923300 |
| C | 3.91660200  | 4.26640300  | -0.78656600 |
| C | 4.35382700  | 3.36873400  | -1.92754200 |
| H | 4.47471600  | 4.05820000  | 0.12844100  |
| H | 4.01905800  | 5.32223800  | -1.04287200 |
| H | 5.41503300  | 3.52264100  | -2.13964900 |
| H | 4.19854700  | 2.31850800  | -1.66898200 |
| H | 3.77995500  | 3.59227300  | -2.82934100 |
| H | 0.53946800  | 3.46992300  | 1.50527100  |
| H | -1.39149100 | 2.17752300  | 1.87614200  |
| C | -0.54384600 | 0.62144200  | 2.82408300  |
| H | 2.62374600  | -3.71380900 | 2.71558000  |

**Z-TS7(R)**

|   |             |             |             |
|---|-------------|-------------|-------------|
| C | -5.01390600 | -0.10500000 | -0.62671300 |
|---|-------------|-------------|-------------|

|   |             |             |             |
|---|-------------|-------------|-------------|
| C | -4.03416200 | 0.25119000  | 0.30847400  |
| C | -3.81266500 | 1.58026700  | 0.64717600  |
| C | -4.53459200 | 2.56439200  | -0.02820700 |
| C | -5.46479200 | 2.21721100  | -1.00784500 |
| C | -5.72333400 | 0.87772500  | -1.30556100 |
| C | -5.19516900 | -1.60242500 | -0.64866300 |
| C | -4.63647400 | -1.96441200 | 0.74682300  |
| C | -3.43870900 | -0.99356400 | 0.91996900  |
| H | -3.04993500 | 1.84226600  | 1.37252900  |
| H | -4.36335100 | 3.60988100  | 0.20630600  |
| H | -6.01346300 | 2.99705900  | -1.52686100 |
| H | -6.48408600 | 0.61054100  | -2.03303100 |
| H | -4.59983800 | -2.06223300 | -1.44720200 |
| H | -5.37816000 | -1.67918800 | 1.49755300  |
| H | -6.23304100 | -1.91702300 | -0.77673700 |
| H | -3.14498000 | -0.86438500 | 1.96440600  |
| N | -2.26802400 | -1.59153400 | 0.21428800  |
| O | -4.35287200 | -3.31703500 | 0.99931300  |
| C | -1.01539300 | -1.05533200 | 0.01780500  |
| C | -2.19585600 | -2.95863800 | 0.04196000  |
| N | -0.28190900 | -2.15115400 | -0.23384800 |
| N | -0.99003000 | -3.33373700 | -0.23491100 |
| C | -3.38335800 | -3.86199900 | 0.13383800  |
| H | -3.79737700 | -4.03359800 | -0.86914300 |
| H | -3.07512600 | -4.82423600 | 0.54476300  |
| C | 1.14877000  | -2.31306400 | -0.21696300 |
| C | 1.71796300  | -2.97202500 | -1.30131400 |
| C | 1.88439400  | -1.97473400 | 0.93018900  |
| C | 3.05939800  | -3.32936800 | -1.26665100 |
| C | 3.22786300  | -2.36656700 | 0.93719300  |
| C | 3.81037600  | -3.03760200 | -0.13284800 |
| H | 3.50986200  | -3.82837300 | -2.11781800 |
| H | 3.84328500  | -2.12193700 | 1.79550300  |
| H | 1.09787200  | -3.19596400 | -2.16252800 |
| H | 4.86073000  | -3.30759000 | -0.08876500 |
| C | 1.25576400  | -1.25468100 | 2.11738400  |
| C | 2.28830000  | -0.67382200 | 3.08526700  |
| C | 0.30753100  | -2.18930200 | 2.88557700  |
| H | 0.67798900  | -0.40808400 | 1.72901300  |
| H | 1.77602100  | -0.08798700 | 3.85401900  |
| H | 2.85255100  | -1.46093000 | 3.59745100  |
| H | 2.99592300  | -0.01431400 | 2.57364500  |
| H | 0.87057200  | -3.01663100 | 3.33075400  |
| H | -0.18869100 | -1.64116000 | 3.69263600  |

|   |             |             |             |
|---|-------------|-------------|-------------|
| H | -0.46474900 | -2.62427300 | 2.24526000  |
| C | -0.99516600 | 2.60463000  | -1.87736900 |
| C | -1.40905000 | 1.56041800  | -1.14892300 |
| C | -0.54125700 | 1.15966200  | 0.01469700  |
| O | -0.77293000 | 1.50281300  | 1.16534500  |
| C | -1.83294900 | 3.19475900  | -2.97477400 |
| H | -2.78911200 | 2.67431600  | -3.06418200 |
| H | -2.03239700 | 4.25268300  | -2.77216800 |
| H | -1.30918600 | 3.14568700  | -3.93591700 |
| C | 0.35004500  | 3.25626500  | -1.64495500 |
| H | 0.20364200  | 4.30017800  | -1.34812500 |
| H | 0.88279700  | 3.27648600  | -2.60327600 |
| H | -2.36462500 | 1.08847200  | -1.32989800 |
| C | 1.22671300  | 2.56164400  | -0.58339600 |
| N | 0.88517900  | 1.12131700  | -0.39446700 |
| N | 1.06073900  | 0.43797500  | -1.60760100 |
| O | 2.18424400  | -0.45453200 | -3.29608400 |
| C | 3.54302400  | 0.05817900  | -1.41866900 |
| C | 3.73763200  | 0.52493900  | -0.11482900 |
| C | 5.01521700  | 0.52587500  | 0.44171300  |
| C | 6.10361600  | 0.05265500  | -0.28306500 |
| C | 5.91442600  | -0.42034300 | -1.58122300 |
| C | 4.64513800  | -0.41225200 | -2.14303300 |
| H | 2.89787200  | 0.85701300  | 0.48146100  |
| H | 5.15146600  | 0.89447800  | 1.45451500  |
| H | 6.75775900  | -0.79191800 | -2.15472000 |
| H | 4.47456600  | -0.78039400 | -3.14838000 |
| C | 1.19889500  | 3.27011300  | 0.77158000  |
| O | 0.68248600  | 4.34326600  | 0.96953300  |
| O | 1.90115700  | 2.58996200  | 1.68178800  |
| C | 1.88193500  | 3.11367000  | 3.02059700  |
| C | 0.55922000  | 2.82360100  | 3.70355900  |
| H | 2.08499300  | 4.18697900  | 2.98280800  |
| H | 2.71104000  | 2.60692800  | 3.51860900  |
| H | 0.60631100  | 3.15165600  | 4.74552700  |
| H | -0.25245300 | 3.34987400  | 3.19934000  |
| H | 0.33989700  | 1.75431600  | 3.66988300  |
| H | 2.27613700  | 2.58224200  | -0.89994400 |
| H | 0.30658400  | 0.49654000  | -2.28631700 |
| C | 2.23201400  | -0.00650400 | -2.15416800 |
| H | 7.09592000  | 0.05339800  | 0.15788000  |

**Z-TS7(S)**

|   |            |             |             |
|---|------------|-------------|-------------|
| C | 3.87238300 | -1.10489100 | -1.11579100 |
|---|------------|-------------|-------------|

|   |              |              |              |
|---|--------------|--------------|--------------|
| C | 2. 65227000  | -0. 42723600 | -1. 16708000 |
| C | 2. 61724900  | 0. 96300300  | -1. 09059500 |
| C | 3. 81550100  | 1. 66114400  | -0. 95748900 |
| C | 5. 03546600  | 0. 98415800  | -0. 92523500 |
| C | 5. 07003200  | -0. 40576300 | -0. 99975200 |
| C | 3. 68406000  | -2. 58574300 | -1. 26500100 |
| C | 2. 29542800  | -2. 68066600 | -1. 92445000 |
| C | 1. 51588600  | -1. 36532000 | -1. 53847800 |
| H | 1. 67356400  | 1. 49230000  | -1. 14928000 |
| H | 3. 78282000  | 2. 74354900  | -0. 88827900 |
| H | 5. 96338200  | 1. 54297200  | -0. 84379500 |
| H | 6. 01624600  | -0. 93964900 | -0. 98213800 |
| H | 3. 70338800  | -3. 07425000 | -0. 28343200 |
| H | 2. 42777400  | -2. 64524700 | -3. 00850500 |
| H | 4. 44713900  | -3. 06514000 | -1. 88313700 |
| H | 0. 98479300  | -0. 96829600 | -2. 40764500 |
| N | 0. 43548500  | -1. 66267600 | -0. 56212900 |
| O | 1. 61833300  | -3. 89495000 | -1. 68324600 |
| C | -0. 67504300 | -0. 90170600 | -0. 31741600 |
| C | 0. 20346300  | -2. 93486500 | -0. 09111100 |
| N | -1. 48584300 | -1. 77575700 | 0. 29652600  |
| N | -0. 97418200 | -3. 04050100 | 0. 44319600  |
| C | 1. 17903200  | -4. 02827000 | -0. 34541800 |
| H | 2. 01263100  | -3. 98032900 | 0. 36813800  |
| H | 0. 68521300  | -4. 99516500 | -0. 24901200 |
| C | -2. 88757300 | -1. 54892100 | 0. 51340000  |
| C | -3. 33808600 | -1. 21688100 | 1. 78564900  |
| C | -3. 74172800 | -1. 63898400 | -0. 59368300 |
| C | -4. 67939900 | -0. 89401000 | 1. 96505100  |
| C | -5. 08210200 | -1. 30180100 | -0. 38171100 |
| C | -5. 54566900 | -0. 92208600 | 0. 87516800  |
| H | -5. 04400000 | -0. 62230400 | 2. 95003600  |
| H | -5. 77861500 | -1. 34241900 | -1. 21358400 |
| H | -2. 62466800 | -1. 20727600 | 2. 60490800  |
| H | -6. 59169600 | -0. 66271900 | 1. 00524900  |
| C | -3. 23915900 | -2. 06308500 | -1. 96574400 |
| C | -2. 92343200 | -0. 84977100 | -2. 85286700 |
| C | -4. 22791300 | -2. 99586600 | -2. 67248700 |
| H | -2. 31081300 | -2. 62652200 | -1. 81772400 |
| H | -2. 61624800 | -1. 18459600 | -3. 84847000 |
| H | -3. 81539200 | -0. 22327400 | -2. 96975900 |
| H | -2. 11979000 | -0. 23198100 | -2. 43927800 |
| H | -4. 51410200 | -3. 83496100 | -2. 03310100 |
| H | -5. 13760400 | -2. 46515100 | -2. 97031500 |

|   |             |             |             |
|---|-------------|-------------|-------------|
| H | -3.77276200 | -3.39491300 | -3.58306300 |
| C | -2.71320900 | 2.49392900  | 0.65963300  |
| C | -2.33246100 | 1.50672300  | -0.16043700 |
| C | -0.86646700 | 1.31990600  | -0.40919200 |
| O | -0.36303500 | 1.66443500  | -1.46970200 |
| C | -4.15861900 | 2.83751700  | 0.87888100  |
| H | -4.81231400 | 2.17560400  | 0.30681700  |
| H | -4.41747200 | 2.74499800  | 1.94015900  |
| H | -4.35996900 | 3.87409400  | 0.58770900  |
| C | -1.71334500 | 3.32584400  | 1.43448700  |
| H | -1.88091600 | 4.38398500  | 1.20990400  |
| H | -1.92627900 | 3.20743700  | 2.50488800  |
| H | -3.05458100 | 0.94339900  | -0.74092200 |
| C | -0.23537500 | 2.96593300  | 1.17691900  |
| N | -0.06537900 | 1.52701800  | 0.83980300  |
| N | -0.53896500 | 0.79628800  | 1.93521400  |
| O | -0.53864600 | -1.02587000 | 3.22807500  |
| C | 1.57116000  | -0.47794100 | 2.31859000  |
| C | 2.49446200  | 0.54653900  | 2.10615700  |
| C | 3.85440600  | 0.24893500  | 2.08872400  |
| C | 4.29275100  | -1.06333700 | 2.23552400  |
| C | 3.36969500  | -2.09180700 | 2.42478600  |
| C | 2.01443100  | -1.79430700 | 2.48699800  |
| H | 2.16288700  | 1.56488000  | 1.93419900  |
| H | 4.57315600  | 1.04529800  | 1.93127500  |
| H | 3.70896900  | -3.11629900 | 2.54853500  |
| H | 1.27438900  | -2.56465500 | 2.68221500  |
| C | 0.48499400  | 3.78707100  | 0.10960100  |
| O | 1.69071800  | 3.79873800  | 0.01847600  |
| O | -0.33849300 | 4.49823700  | -0.65720600 |
| C | 0.27833100  | 5.22692500  | -1.73661800 |
| C | 0.64741100  | 4.30045900  | -2.87892200 |
| H | 1.15466000  | 5.75059100  | -1.34627600 |
| H | -0.47599700 | 5.95644100  | -2.03534600 |
| H | 1.03335100  | 4.88985700  | -3.71504600 |
| H | 1.41317400  | 3.58980400  | -2.56150200 |
| H | -0.22639000 | 3.73569300  | -3.20783500 |
| H | 0.34621700  | 3.12793400  | 2.08910200  |
| H | -1.54795000 | 0.77843100  | 2.07675900  |
| C | 0.10448700  | -0.26682800 | 2.51003500  |
| H | 5.35506200  | -1.28543300 | 2.19735000  |

**When the reaction in 1,4-dioxane:**

**M4-NHC**

|   |             |             |             |
|---|-------------|-------------|-------------|
| C | 3.54047800  | 0.56417100  | -0.10040200 |
| C | 2.60972100  | 1.05336900  | -1.02383700 |
| C | 2.27949100  | 2.40399100  | -1.08101100 |
| C | 2.86888000  | 3.26939000  | -0.16060900 |
| C | 3.77354600  | 2.78298000  | 0.78462100  |
| C | 4.12369900  | 1.43359200  | 0.81410900  |
| C | 3.78919300  | -0.90787900 | -0.29623600 |
| C | 3.19315600  | -1.15575800 | -1.70073000 |
| C | 2.08171100  | -0.08675400 | -1.85851700 |
| H | 1.58951900  | 2.78007000  | -1.82997300 |
| H | 2.62862100  | 4.32738500  | -0.18531400 |
| H | 4.22231700  | 3.46854900  | 1.49672200  |
| H | 4.84336400  | 1.06587200  | 1.53860800  |
| H | 3.28460500  | -1.51347000 | 0.46787400  |
| H | 3.94536900  | -0.93721800 | -2.46308600 |
| H | 4.85264700  | -1.15972800 | -0.27118300 |
| H | 1.84509700  | 0.15609600  | -2.89563500 |
| N | 0.85533100  | -0.65430700 | -1.24374300 |
| O | 2.74312700  | -2.46140700 | -1.98388400 |
| C | -0.23016000 | 0.00187500  | -0.81330400 |
| C | 0.69795500  | -1.95660500 | -0.86680600 |
| N | -1.00317900 | -0.90570000 | -0.23515000 |
| N | -0.45034300 | -2.13884200 | -0.27129100 |
| C | 1.78918900  | -2.95915100 | -1.06427000 |
| H | 2.21525500  | -3.17079900 | -0.07329100 |
| H | 1.37768700  | -3.87612400 | -1.48938500 |
| C | -2.23048800 | -0.66698300 | 0.47602400  |
| C | -2.13718000 | -0.70316500 | 1.86514500  |
| C | -3.40996600 | -0.40880200 | -0.22345500 |
| C | -3.28281900 | -0.43969600 | 2.60509500  |
| C | -4.54016200 | -0.14698900 | 0.55869600  |
| C | -4.47953800 | -0.15466900 | 1.94781100  |
| H | -3.24035100 | -0.45810700 | 3.68854200  |
| H | -5.48661200 | 0.05586000  | 0.06599200  |
| H | -1.17358300 | -0.92401500 | 2.32421000  |
| H | -5.37638500 | 0.05441900  | 2.52207900  |
| C | -3.50636400 | -0.46926900 | -1.73782700 |
| C | -4.11710100 | 0.80432900  | -2.32891100 |
| C | -4.30380800 | -1.71095500 | -2.15794800 |
| H | -2.49719900 | -0.57222700 | -2.15123100 |
| H | -4.12686600 | 0.74228100  | -3.42025800 |
| H | -5.14925500 | 0.94244100  | -1.99250500 |
| H | -3.54474700 | 1.69029500  | -2.04269200 |
| H | -3.84870600 | -2.62221000 | -1.76147800 |

|   |             |             |             |
|---|-------------|-------------|-------------|
| H | -5.33096300 | -1.65310600 | -1.78372300 |
| H | -4.34266100 | -1.78631400 | -3.24825500 |
| C | -0.92288400 | 2.63424200  | 0.88642100  |
| C | -1.21813300 | 2.39432500  | -0.40790600 |
| C | -0.65344500 | 1.37869500  | -1.28921400 |
| O | -0.58506900 | 1.51303800  | -2.49940100 |
| C | 0.10460400  | 1.91453800  | 1.69700800  |
| H | 0.80396700  | 2.65561100  | 2.10224300  |
| H | -0.36789000 | 1.42350500  | 2.55454100  |
| H | 0.68406600  | 1.15825600  | 1.17097700  |
| C | -1.63243000 | 3.74612400  | 1.60339900  |
| H | -0.90904800 | 4.46767800  | 1.99615000  |
| H | -2.34767900 | 4.26618900  | 0.96481000  |
| H | -2.16504800 | 3.33078200  | 2.46639800  |
| H | -1.88697000 | 3.06788900  | -0.93776100 |
| H | 0.87180000  | -2.86027500 | 3.80441900  |
| C | 1.40327000  | -1.87096200 | 2.28797100  |
| O | 1.17275300  | -0.83550400 | 1.63175600  |
| O | 2.22349300  | -2.78678300 | 2.07436000  |
| O | 0.60500900  | -2.01578600 | 3.41986900  |

**TS6(R)-NHC**

|   |             |             |             |
|---|-------------|-------------|-------------|
| C | -3.78445900 | -2.16819200 | 0.09863400  |
| C | -2.83423600 | -1.49311700 | -0.66301500 |
| C | -2.94107900 | -1.40474500 | -2.04683000 |
| C | -4.02978600 | -2.01669100 | -2.66473300 |
| C | -4.99109000 | -2.69040800 | -1.90759000 |
| C | -4.87652400 | -2.76874700 | -0.52089900 |
| C | -3.47074000 | -2.07663200 | 1.56983800  |
| C | -2.03677800 | -1.50633700 | 1.63818200  |
| C | -1.79505700 | -0.85451400 | 0.23202900  |
| H | -2.20365900 | -0.84076800 | -2.60881400 |
| H | -4.13762600 | -1.96160700 | -3.74337500 |
| H | -5.83490800 | -3.15903500 | -2.40452400 |
| H | -5.62623800 | -3.29243300 | 0.06547600  |
| H | -3.51155400 | -3.03888900 | 2.08907700  |
| H | -1.91896400 | -0.74692700 | 2.41273000  |
| H | -4.17384800 | -1.39947900 | 2.06603600  |
| H | -1.90102900 | 0.22911500  | 0.28538200  |
| N | -0.43062400 | -1.11312300 | -0.21881300 |
| O | -1.10332300 | -2.52426600 | 1.98697000  |
| C | 0.46117200  | -0.32943900 | -0.84243900 |
| C | 0.18086000  | -2.29572300 | 0.05615600  |
| N | 1.55626800  | -1.09096200 | -0.97258800 |



|   |              |              |              |
|---|--------------|--------------|--------------|
| N | 1. 39878900  | -2. 32173000 | -0. 39976800 |
| C | -0. 56661200 | -3. 26367100 | 0. 91116000  |
| H | -1. 34699400 | -3. 77208000 | 0. 32762800  |
| H | 0. 11786100  | -4. 00589400 | 1. 32166400  |
| C | 2. 73553100  | -0. 81743900 | -1. 74618800 |
| C | 2. 54799800  | -0. 46905000 | -3. 08221800 |
| C | 4. 00263100  | -0. 93631100 | -1. 16574600 |
| C | 3. 65085100  | -0. 21767500 | -3. 88403800 |
| C | 5. 09303700  | -0. 69178900 | -2. 00865200 |
| C | 4. 92824800  | -0. 33442500 | -3. 34111300 |
| H | 3. 51258500  | 0. 05682400  | -4. 92365200 |
| H | 6. 09683600  | -0. 78304300 | -1. 60670000 |
| H | 1. 54016400  | -0. 40110300 | -3. 47956800 |
| H | 5. 80054900  | -0. 14856600 | -3. 95924300 |
| C | 4. 22399000  | -1. 34502300 | 0. 28079700  |
| C | 5. 29664100  | -0. 48802400 | 0. 95967100  |
| C | 4. 58975800  | -2. 83265400 | 0. 36451700  |
| H | 3. 28252000  | -1. 20247900 | 0. 82481700  |
| H | 5. 37200700  | -0. 75719800 | 2. 01659500  |
| H | 6. 28278700  | -0. 65116200 | 0. 51504600  |
| H | 5. 05960800  | 0. 57697200  | 0. 88683600  |
| H | 3. 81117800  | -3. 45130600 | -0. 08584000 |
| H | 5. 53426200  | -3. 02297500 | -0. 15645700 |
| H | 4. 71277000  | -3. 13091600 | 1. 41048300  |
| C | 2. 11710700  | 2. 44801600  | -0. 77588600 |
| C | 1. 07987100  | 2. 05865000  | -1. 61009200 |
| C | 0. 12927200  | 1. 00631600  | -1. 46614400 |
| O | -1. 00238800 | 1. 02471200  | -1. 98918800 |
| C | 2. 81079500  | 3. 75841100  | -1. 07516400 |
| H | 2. 93274200  | 4. 34809300  | -0. 16029600 |
| H | 3. 81358700  | 3. 57510100  | -1. 47532600 |
| H | 2. 25918800  | 4. 35554700  | -1. 80467000 |
| C | 2. 46111200  | 1. 79430200  | 0. 42664200  |
| H | 2. 40633500  | 0. 71379600  | 0. 46967800  |
| H | 3. 28833000  | 2. 21107700  | 0. 99967200  |
| H | 0. 75514400  | 2. 76753400  | -2. 36898400 |
| C | 0. 79086200  | 2. 00595300  | 1. 59613500  |
| N | -0. 33288700 | 1. 89931900  | 0. 88962900  |
| N | -0. 73480900 | 3. 14591600  | 0. 41454100  |
| O | -1. 98902600 | 4. 18891900  | -1. 14565300 |
| C | -3. 03548500 | 2. 40179300  | 0. 03409500  |
| C | -3. 34234700 | 2. 09664000  | 1. 36182800  |
| C | -4. 45873800 | 1. 31639300  | 1. 65084900  |
| C | -5. 25587400 | 0. 82653000  | 0. 61621300  |

|   |             |             |             |
|---|-------------|-------------|-------------|
| C | -4.94533700 | 1.12864500  | -0.70833800 |
| C | -3.84327700 | 1.92660400  | -0.99837100 |
| H | -2.70101600 | 2.46413000  | 2.15673900  |
| H | -4.70703300 | 1.08979500  | 2.68391800  |
| H | -5.54982700 | 0.72299400  | -1.51362500 |
| H | -3.56868400 | 2.16376700  | -2.02067800 |
| C | 1.10154800  | 0.82764000  | 2.45559500  |
| O | 0.87708700  | -0.33034100 | 2.17004600  |
| O | 1.69461400  | 1.21011300  | 3.59347100  |
| C | 2.06213400  | 0.15628300  | 4.50107300  |
| C | 3.35931300  | -0.49927500 | 4.07029100  |
| H | 1.24713400  | -0.56961100 | 4.54572900  |
| H | 2.16367100  | 0.65084600  | 5.46806500  |
| H | 3.67585900  | -1.23240000 | 4.81665900  |
| H | 3.22193800  | -1.01298900 | 3.11574000  |
| H | 4.14654500  | 0.25137700  | 3.96299300  |
| H | 1.06956900  | 2.96696200  | 2.03162700  |
| H | 0.00499800  | 3.76672700  | 0.08867000  |
| C | -1.88629100 | 3.29462400  | -0.31760600 |
| H | -6.11377400 | 0.19968200  | 0.84247100  |

**M4-NHC1**

|   |             |             |             |
|---|-------------|-------------|-------------|
| C | -3.68888700 | 0.63252300  | -0.22249000 |
| C | -2.71880800 | 1.27721300  | 0.55016000  |
| C | -2.31561600 | 2.57893600  | 0.26159200  |
| C | -2.86437200 | 3.21627900  | -0.85033900 |
| C | -3.81108200 | 2.56482200  | -1.64117400 |
| C | -4.23868400 | 1.27709900  | -1.32415200 |
| C | -4.00651300 | -0.73768100 | 0.30868800  |
| C | -3.39718600 | -0.69852000 | 1.72593700  |
| C | -2.27135900 | 0.37537300  | 1.67727400  |
| H | -1.61112700 | 3.10364200  | 0.89754700  |
| H | -2.56425300 | 4.23104800  | -1.09051500 |
| H | -4.23191400 | 3.07358900  | -2.50275400 |
| H | -4.99048000 | 0.78118300  | -1.93019300 |
| H | -3.53661600 | -1.50027100 | -0.32276600 |
| H | -4.14428300 | -0.32362400 | 2.43023800  |
| H | -5.08029300 | -0.93776000 | 0.34943300  |
| H | -2.12647900 | 0.88582900  | 2.63060800  |
| N | -0.98980700 | -0.31651500 | 1.38044100  |
| O | -2.97238900 | -1.92981200 | 2.26714500  |
| C | 0.18496400  | 0.22853600  | 1.04601000  |
| C | -0.82952300 | -1.66867000 | 1.28924100  |
| N | 1.01437800  | -0.78229800 | 0.80623400  |

|   |             |             |             |
|---|-------------|-------------|-------------|
| N | 0.39997100  | -1.97933800 | 0.97409100  |
| C | -1.98481200 | -2.58934600 | 1.49612300  |
| H | -2.34534800 | -2.89985800 | 0.50379100  |
| H | -1.66273100 | -3.46455400 | 2.06228500  |
| C | 2.40966900  | -0.70460200 | 0.46157700  |
| C | 2.79335600  | -1.15795100 | -0.80734000 |
| C | 3.30708100  | -0.18091200 | 1.39581300  |
| C | 4.13505600  | -1.00218800 | -1.14903400 |
| C | 4.63854200  | -0.05575100 | 0.99805300  |
| C | 5.06684900  | -0.44798300 | -0.26838700 |
| H | 4.46084200  | -1.33117100 | -2.13288300 |
| H | 5.35720700  | 0.35297300  | 1.70400000  |
| C | 1.43866300  | 2.27571300  | -1.03244100 |
| C | 1.39197800  | 2.40784500  | 0.30880100  |
| C | 0.54214700  | 1.68332000  | 1.24737800  |
| O | 0.15508300  | 2.15336600  | 2.30341700  |
| C | 0.54746100  | 1.40907200  | -1.86576100 |
| H | -0.12040600 | 0.72725900  | -1.33697200 |
| H | -0.08714300 | 2.06910500  | -2.47066100 |
| H | 1.14744300  | 0.82607800  | -2.57264500 |
| C | 2.41249100  | 3.10844800  | -1.81514300 |
| H | 1.89233000  | 3.67784500  | -2.59178400 |
| H | 2.97740200  | 3.79470900  | -1.18299500 |
| H | 3.11558000  | 2.44201800  | -2.32754400 |
| H | 1.98659700  | 3.17665700  | 0.79578700  |
| H | -1.40790100 | -2.95337300 | -3.55682600 |
| C | -1.67660000 | -2.04675800 | -1.93277000 |
| O | -1.34509600 | -1.04690600 | -1.25850300 |
| O | -2.47089200 | -2.96467900 | -1.63916900 |
| O | -1.06190900 | -2.13826700 | -3.17182300 |
| C | 2.89522700  | 0.23680100  | 2.78529800  |
| H | 2.67903100  | 1.30861400  | 2.83807900  |
| H | 2.00974300  | -0.30019900 | 3.13384900  |
| H | 3.70840000  | 0.03458400  | 3.48496600  |
| C | 6.51375000  | -0.32193900 | -0.66847500 |
| H | 7.03271800  | 0.41640000  | -0.05397700 |
| H | 7.02990200  | -1.27966300 | -0.54843900 |
| H | 6.60770400  | -0.02808100 | -1.71661700 |
| C | 1.82127600  | -1.81352700 | -1.74985400 |
| H | 1.73072000  | -2.87780900 | -1.50787300 |
| H | 0.81559700  | -1.39205700 | -1.68746400 |
| H | 2.17717900  | -1.73258300 | -2.77908000 |

TS6(R)-NHC1

|   |             |             |             |
|---|-------------|-------------|-------------|
| C | 3.90547500  | -0.82864800 | -1.78449000 |
| C | 2.80257100  | -1.23246000 | -1.03598500 |
| C | 2.70462300  | -2.52107400 | -0.52145700 |
| C | 3.74383200  | -3.41316800 | -0.77656800 |
| C | 4.85793800  | -3.01407500 | -1.51919800 |
| C | 4.94745200  | -1.71908900 | -2.02643500 |
| C | 3.79182400  | 0.62016500  | -2.18540500 |
| C | 2.33822400  | 1.01712800  | -1.84479200 |
| C | 1.84900500  | -0.07603200 | -0.83189700 |
| H | 1.84957500  | -2.79380400 | 0.08904200  |
| H | 3.69288000  | -4.42463300 | -0.38617200 |
| H | 5.66082200  | -3.72106900 | -1.70421100 |
| H | 5.81489800  | -1.41188300 | -2.60380400 |
| H | 3.98516100  | 0.79910600  | -3.24739600 |
| H | 2.26393600  | 2.00102300  | -1.37928300 |
| H | 4.49705300  | 1.23034100  | -1.61128600 |
| H | 1.87048700  | 0.30369700  | 0.18970800  |
| N | 0.46216100  | -0.43694600 | -1.11136700 |
| O | 1.54794400  | 1.11873100  | -3.02561500 |
| C | -0.57421200 | -0.67734100 | -0.29502000 |
| C | 0.00389500  | -0.50103400 | -2.39032700 |
| N | -1.60356800 | -0.93536300 | -1.11376600 |
| N | -1.25936300 | -0.81129500 | -2.43082700 |
| C | 0.94812900  | -0.08103000 | -3.46677500 |
| H | 1.69034400  | -0.86811700 | -3.65960000 |
| H | 0.40145000  | 0.13302500  | -4.38505800 |
| C | -2.92981500 | -1.36207400 | -0.76499000 |
| C | -3.09265400 | -2.58712900 | -0.10690300 |
| C | -4.00358500 | -0.54362900 | -1.12911400 |
| C | -4.38966400 | -2.95162000 | 0.24619100  |
| C | -5.27932000 | -0.95882100 | -0.74887300 |
| C | -5.48975200 | -2.14540700 | -0.04917300 |
| H | -4.54394300 | -3.89913800 | 0.75642500  |
| H | -6.13047600 | -0.33586200 | -1.01329700 |
| C | -2.43686100 | 0.40346100  | 2.12929900  |
| C | -1.50612400 | -0.62558000 | 2.11459200  |
| C | -0.44859100 | -0.88851000 | 1.19631900  |
| O | 0.58725100  | -1.51226700 | 1.50455900  |
| C | -3.30761700 | 0.55979400  | 3.35510200  |
| H | -3.34492600 | 1.60724000  | 3.67214100  |
| H | -4.33527500 | 0.25507400  | 3.12984400  |
| H | -2.95062300 | -0.04565700 | 4.19113300  |
| C | -2.51248100 | 1.40494300  | 1.14249300  |
| H | -2.30977100 | 1.13245500  | 0.11702300  |

|   |             |             |             |
|---|-------------|-------------|-------------|
| H | -3.28697300 | 2.16362200  | 1.24760700  |
| H | -1.36679000 | -1.18813700 | 3.03579600  |
| C | -0.69259700 | 2.36605500  | 1.27012800  |
| N | 0.30127400  | 1.50837000  | 1.48346000  |
| N | 0.53439300  | 1.34131500  | 2.84582500  |
| O | 1.47962500  | -0.00900400 | 4.38878300  |
| C | 2.80923700  | 0.51846700  | 2.48050500  |
| C | 3.30148900  | 1.67161600  | 1.86539700  |
| C | 4.50148800  | 1.62253000  | 1.16208700  |
| C | 5.20266100  | 0.42063500  | 1.06082200  |
| C | 4.71053500  | -0.72906200 | 1.67497700  |
| C | 3.52062600  | -0.67778300 | 2.39401600  |
| H | 2.73710500  | 2.59613400  | 1.93320200  |
| H | 4.89095900  | 2.52183300  | 0.69345300  |
| H | 5.24078500  | -1.67053600 | 1.56933500  |
| H | 3.10703000  | -1.56121800 | 2.86900700  |
| C | -0.76866300 | 2.90062600  | -0.11937300 |
| O | -0.47776100 | 2.28784000  | -1.12658500 |
| O | -1.23353300 | 4.15602900  | -0.11726400 |
| C | -1.37096500 | 4.79474500  | -1.39875100 |
| C | -2.66984800 | 4.39349200  | -2.06997300 |
| H | -0.50875200 | 4.53396400  | -2.01600300 |
| H | -1.34910000 | 5.86218000  | -1.17456800 |
| H | -2.80949700 | 4.97145500  | -2.98706100 |
| H | -2.65055100 | 3.33375400  | -2.33014800 |
| H | -3.51727800 | 4.58435200  | -1.40669900 |
| H | -0.97989100 | 3.07610400  | 2.04686100  |
| H | -0.28874700 | 1.28739300  | 3.44390800  |
| C | 1.55864100  | 0.54898500  | 3.30347100  |
| H | 6.12760700  | 0.37747900  | 0.49269600  |
| C | -1.93692500 | -3.50494700 | 0.19720500  |
| H | -1.16031000 | -3.44799600 | -0.57095100 |
| H | -1.47041700 | -3.25932000 | 1.15587500  |
| H | -2.28873800 | -4.53709100 | 0.24741000  |
| C | -6.87462800 | -2.54793300 | 0.38619700  |
| H | -7.63428300 | -2.14420100 | -0.28675000 |
| H | -6.97980000 | -3.63484300 | 0.41508800  |
| H | -7.08565300 | -2.16867800 | 1.39138400  |
| C | -3.83299000 | 0.71629200  | -1.93907000 |
| H | -4.02277900 | 0.50941900  | -2.99696200 |
| H | -4.54559300 | 1.47583000  | -1.60736400 |
| H | -2.82452100 | 1.12856600  | -1.86999900 |
